# Supplementary material for: A regioselective, convergent, and additive-free approach for the synthesis of pyrido[1,4]oxazocines
Source: Royal Society of Chemistry journal article supplement (doi:10.1039/d3nj03776b), 2023-01-01

# Supplementary Information

## A regioselective, convergent, and additive-free approach for the synthesis of pyrido[1,4]oxazocines

Kai-Qiang Tian,<sup>‡a</sup> Tongbo Zhang,<sup>‡b</sup> Shi-Jiao Zhang,<sup>c</sup> Jun Zhao,<sup>a</sup> Leilei Mao,<sup>\*d</sup>  
Guiyun Duan<sup>\*a</sup> and Hong-Shuang Li<sup>\*a</sup>

<sup>a</sup> School of Pharmaceutical Sciences & Institute of Materia Medica, Shandong First Medical University & Shandong Academy of Medical Sciences, Taian 271016, P. R. China

E-mail: gyduan@sdfmu.edu.cn; hsli@sdfmu.edu.cn

<sup>b</sup> Beijing Pharmaceutical Research Institute, Heilongjiang ZBD Pharmaceutical Co., Ltd., Beijing 101102, P. R. China

<sup>c</sup> Pharmacy Intravenous Admixture Services, The Affiliated Taian City Central Hospital of Qingdao University, Taian 271000, P. R. China

<sup>d</sup> Institute for Neurological Research, The Second Affiliated Hospital; School of Basic Medical Sciences of Shandong First Medical University & Shandong Academy of Medical Sciences, Taian 271000, P. R. China

E-mail: leilei-0318@163.com

<sup>‡</sup> These authors contributed equally.

| <b>Table of contents:</b>                | <b>Page</b> |
|------------------------------------------|-------------|
| <b>1. General Experiment Information</b> | <b>S2</b>   |
| <b>2. General Procedures</b>             | <b>S4</b>   |
| <b>3. Characterization of Materials</b>  | <b>S9</b>   |
| <b>4. References</b>                     | <b>S26</b>  |
| <b>5. Copies of NMR Spectra</b>          | <b>S27</b>  |

## 1. General Experiment Information

Unless otherwise noted, all the reactions were carried out under ambient atmosphere. All chemicals and solvents were directly used without further purification. Substituted ethanolamines (**2a–2u**) were commercially available.

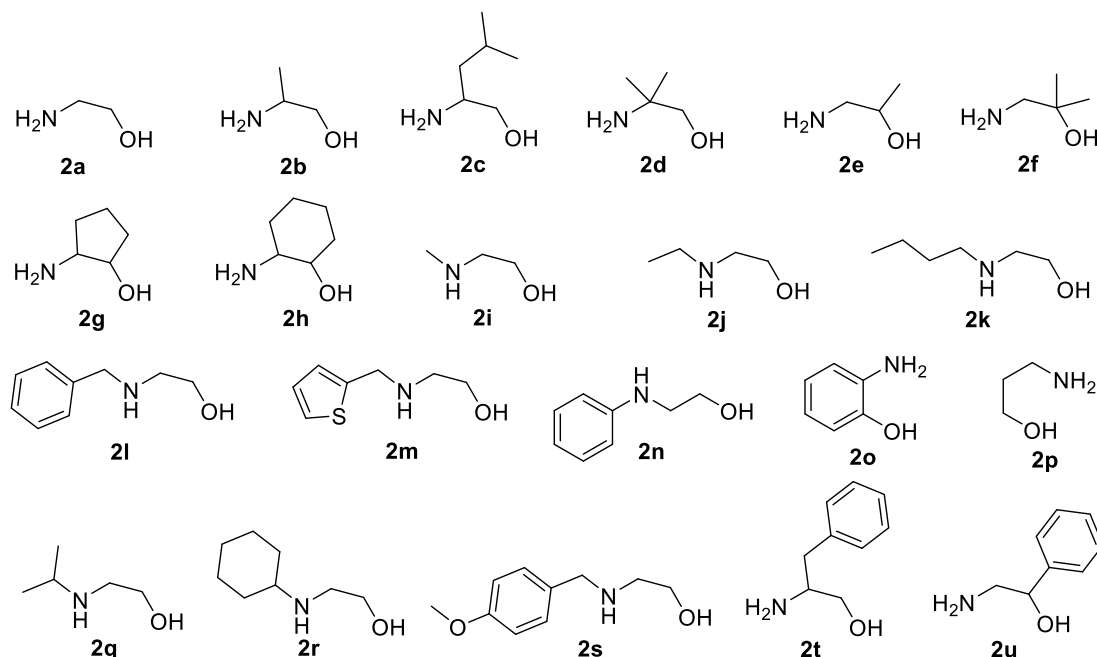

Organic solvents of commercial grade were concentrated under reduced pressure on a EYELA rotary evaporator (Japan). Analytical thin-layer chromatography (TLC) was performed on 0.25 mm commercial silica gel plates (purchased from Aladdin, silica gel GF254), and the compounds were visualized with the UV light at 254 nm and 365 nm, respectively. Column chromatography was performed on silica gel 200–300 mesh (purchased from Qingdao Haiyang Chemical, China). High-resolution mass spectra (HRMS) using electrospray ionization (ESI) as the ion source was performed by LC–MSD TOF using a column of C18 (rapid resolution, 3.5  $\mu\text{m}$ , 2.1 mm  $\times$  30 mm) at a flow of 0.40 mL/min.

$\text{CD}_3\text{OD}$  and  $\text{CDCl}_3$  was purchased from Innochem (Beijing).  $^1\text{H}$  NMR spectra were recorded on the Bruker Ascend<sup>TM</sup> 400 with 400 MHz frequencies, and  $^{13}\text{C}$  NMR spectra were recorded with 100 MHz frequencies. Chemical shifts are given in ppm and coupling constants in Hertz (Hz), respectively.  $^1\text{H}$  spectra were calibrated in relation to the reference measurement of TMS ( $\delta_{\text{H}} = 0.000$  ppm).  $^{13}\text{C}$  spectra were

calibrated in relation to CD<sub>3</sub>OD ( $\delta_C = 49.00$  ppm) or CDCl<sub>3</sub> ( $\delta_C = 77.10$  ppm). The following abbreviations were used for <sup>1</sup>H NMR and <sup>13</sup>C NMR spectra to indicate the signal multiplicities: bs (broad singlet), s (singlet), d (doublet), t (triplet), q (quartet) and m (multiplets), as well as combinations of them.

## 2. General Procedures

### (1) General Procedure for the Preparation of 4-Chloro-3-(oxiran-2-yl)pyridines (1a–1d) and 2-Chloro-3-(oxiran-2-yl)pyridine (1e)

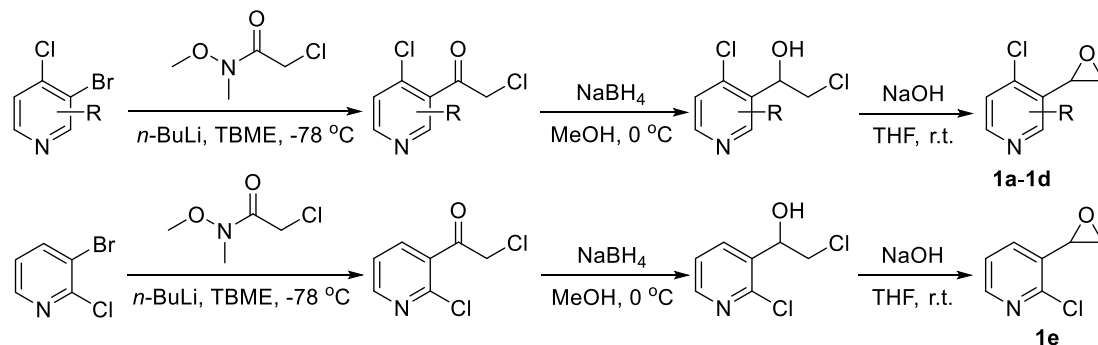

4-Chloro-3-(oxiran-2-yl)pyridines (**1a–1d**) and 2-chloro-3-(oxiran-2-yl)pyridine (**1e**) were prepared from corresponding 3-bromo-4-chloropyridines or 3-bromo-2-chloropyridine through selective lithium–bromine exchange with *n*-BuLi at -78 °C in dry *t*-butyl methyl ether (TBME) with subsequent reaction of the aryllithium with Weinreb amide,<sup>[1]</sup> NaBH<sub>4</sub> reduction,<sup>[2]</sup> and cyclization under basic conditions<sup>[1]</sup> according to the literature procedures.

### (2) General Procedure for the Synthesis of Pyrido[1,4]oxazocines 3

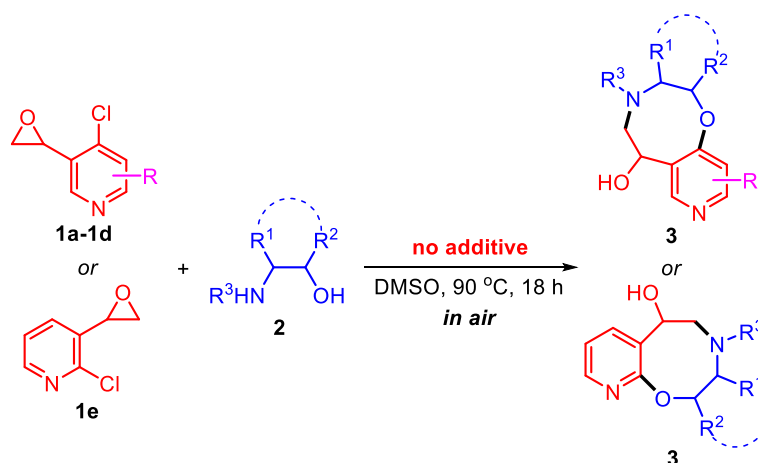

To a sealed tube (10 mL) equipped with a stirrer bar under ambient atmosphere was added 4-Chloro-3-(oxiran-2-yl)pyridine or 2-chloro-3-(oxiran-2-yl)pyridine (**1**, 0.2 mmol) and substituted ethanolamine (**2**, 0.4 mmol). Then DMSO (2.0 mL, 0.1 M) was added. The tube was sealed and the reaction mixture was stirred at 90 °C for 18 h using a Heidolph MR Hei-Tec heating magnetic stirrer (Heidolph Instruments,

Germany). Upon completion, the reaction mixture was cooled to room temperature and 10 mL of H<sub>2</sub>O was added. The mixture was extracted with DCM (3 × 10 mL). The combined organic phases were washed successively with 15 mL of H<sub>2</sub>O and 15 mL of saturated brine, dried over anhydrous Na<sub>2</sub>SO<sub>4</sub>, and concentrated in vacuo. The crude residue was purified by flash chromatography on silica gel (DCM/MeOH) to afford the desired product **3**.

### (3) Scale-Up Synthesis of **3bl**

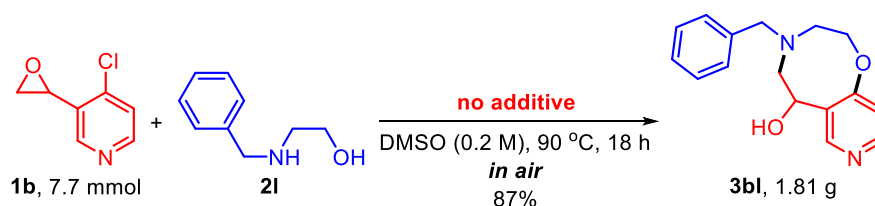

To a 100 mL of round-bottomed flask equipped with a stir bar under air was added 4-chloro-3-(oxiran-2-yl)pyridine **1b** (7.7 mmol, 1.198 g) and 2-(benzylamino)ethan-1-ol **2l** (15.4 mmol, 2.328 g). Then DMSO (38.5 mL, 0.2 M) was added. The reaction mixture was stirred at 90 °C for 18 h using a heating magnetic stirrer. Upon completion, the reaction mixture was cooled to room temperature and 100 mL of H<sub>2</sub>O was added. The mixture was extracted with DCM (3 × 50 mL). The combined organic phases were washed successively with 75 mL of H<sub>2</sub>O and 75 mL of saturated brine, dried over anhydrous Na<sub>2</sub>SO<sub>4</sub>, and concentrated in vacuo. The crude residue was purified by flash chromatography on silica gel (DCM/MeOH = 150:1) to afford the desired product **3bl** as a brown oil (1.81 g, 87%).

### (4) Scale-Up Synthesis of **3el**

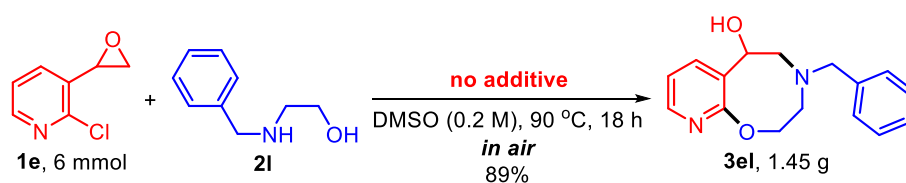

To a 100 mL of round-bottomed flask equipped with a stir bar under air was added 2-chloro-3-(oxiran-2-yl)pyridine **1e** (6 mmol, 0.933 g) and 2-(benzylamino)ethan-1-ol **2l** (12 mmol, 1.815 g). Then DMSO (30 mL, 0.2 M) was added. The reaction mixture was stirred at 90 °C for 18 h using a heating magnetic stirrer. Upon completion, the

reaction mixture was cooled to room temperature and 100 mL of H<sub>2</sub>O was added. The mixture was extracted with DCM (3 × 50 mL). The combined organic phases were washed successively with 75 mL of H<sub>2</sub>O and 75 mL of saturated brine, dried over anhydrous Na<sub>2</sub>SO<sub>4</sub>, and concentrated in vacuo. The crude residue was purified by flash chromatography on silica gel (DCM/MeOH = 150:1) to afford the desired product **3el** as a brown oil (1.45 g, 89%).

### (5) Synthesis of **4**

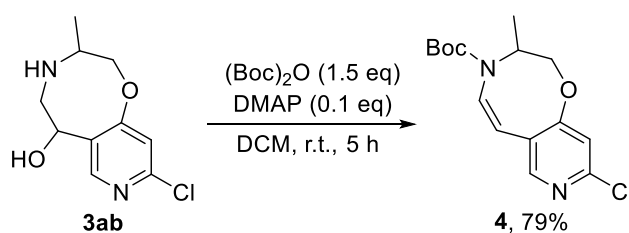

To a solution of 9-chloro-3-methyl-3,4,5,6-tetrahydro-2*H*-pyrido[3,4-*g*][1,4]oxazocin-6-ol (**3ab**, 457.4 mg, 2 mmol) in DCM (10 mL) was added di-*tert*-butyl dicarbonate (654.8 mg, 3 mmol) and DMAP (24.4 mg, 0.2 mmol). The mixture was stirred at room temperature for 5 h. Upon completion of the reaction, H<sub>2</sub>O (6 mL) was added to the mixture and then extracted. The aqueous phase was extracted with DCM (2 × 6 mL). The combined organic phases were dried over anhydrous Na<sub>2</sub>SO<sub>4</sub>, and concentrated in vacuo. The residue was purified by silica gel chromatography (DCM/MeOH = 400:1) to give the target product **4** (491 mg, 79% yield) as a yellow oil.

### (6) Synthesis of **5**

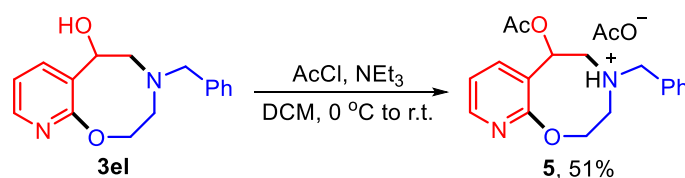

The product **5** was prepared according to the literature procedure.<sup>[3]</sup> To a stirred solution of **3el** (100.0 mg, 0.37 mmol) and triethyl amine (67 μL, 0.48 mmol) in absolute CH<sub>2</sub>Cl<sub>2</sub> (600 μL) was added acetyl chloride (34 μL, 0.48 mmol) at 0 °C. The reaction mixture was taken slowly to room temperature and stirred overnight. To the

crude reaction mixture was added  $\text{CH}_2\text{Cl}_2$  (500  $\mu\text{L}$ ) and a saturated  $\text{NaHCO}_3$  solution (500  $\mu\text{L}$ ). The organic phase was removed and washed with water ( $2 \times 1$  mL). After drying over  $\text{Na}_2\text{SO}_4$ , filtration and evaporation of the solvent, the residue was purified by silica gel chromatography ( $\text{CH}_2\text{Cl}_2/\text{MeOH} = 300:1$ ) to afford the desired product **5** as a light-yellow oil, 70.1 mg (51%).

### (7) Synthesis of **6**

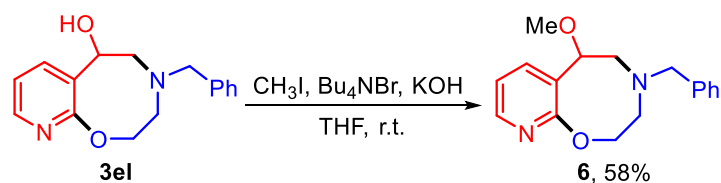

The product **6** was prepared according to the literature procedure.<sup>[4]</sup> A mixture of **3el** (162.2 mg, 0.6 mmol),  $\text{CH}_3\text{I}$  (936.5 mg, 6.6 mmol),  $\text{Bu}_4\text{NBr}$  (851.1 mg, 2.6 mmol), and  $\text{KOH}$  (306.3 mg, 5.5 mmol) in anhydrous THF (10 mL) was stirred for 18 h at room temperature. The mixture was diluted with water and extracted with EA. The extract was washed with water, dried, and evaporated. The residue was purified by silica gel chromatography ( $\text{CH}_2\text{Cl}_2/\text{MeOH} = 300:1$ ) to afford the desired product **6** as a light-yellow oil, 99.1 mg (58%).

### (8) Synthesis of **7**

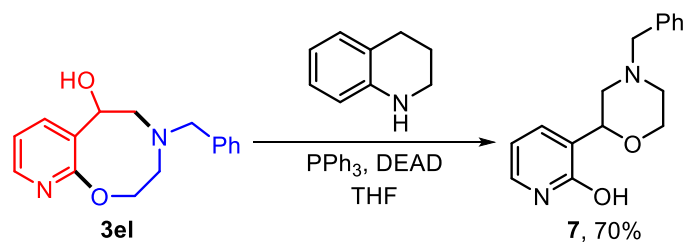

The product **7** was prepared under the Mitsunobu reaction conditions.<sup>[5]</sup> To a stirred solution of **3el** (100.0 mg, 0.37 mmol), 1,2,3,4-tetrahydroquinoline (98.6 mg, 0.74 mmol), and triphenylphosphine (145.6 mg, 0.56 mmol) in anhydrous THF (10 mL) under atmosphere of  $\text{N}_2$  was added DEAD (97.5 mg, 0.56 mmol) in anhydrous THF (5 mL) dropwise at 0  $^\circ\text{C}$ . The reaction mixture was stirred at 0  $^\circ\text{C}$  for additional 1 h. It was then allowed to warm to room temperature and was stirred for an additional 14 h. To the reaction mixture was added hexane (25 mL), and triphenylphosphine oxide

precipitated was filtered off. The solvent was removed in vacuum, and the mixture was diluted with 30 mL of water and the aqueous layer was extracted with EA (3 × 30 mL) and dried over anhydrous Na<sub>2</sub>SO<sub>4</sub>. Concentration under vacuum and column chromatography of crude product over silica gel (CH<sub>2</sub>Cl<sub>2</sub>/MeOH = 300:1) furnished the desired product **7** as a light-yellow oil, 70.4 mg (70%).

### (9) Synthesis of **8**

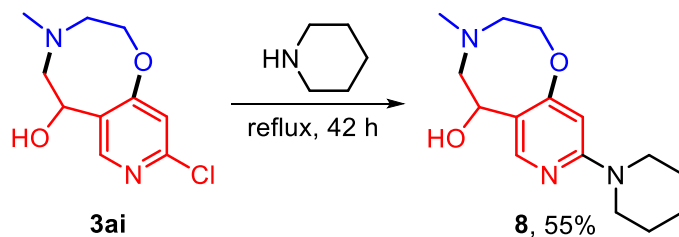

**3ai** (30 mg, 0.13 mmol) was refluxed in piperidine (0.5 mL) for 42 h. The excess of piperidine was distilled off under reduced pressure and the residue was purified by silica gel chromatography (CH<sub>2</sub>Cl<sub>2</sub>/MeOH = 300:1) to afford the desired product **8** as a light-yellow oil, 19.8 mg (55%).



### 3. Characterization of Materials

#### 2,4-dichloro-5-(oxiran-2-yl)pyridine (**1a**)

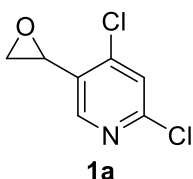

According to the General Procedure, the product **1a** was obtained as a light-yellow oil (42% yield in three steps) after silica gel chromatography (*n*-hexane/EtOAc = 20:1). <sup>1</sup>H NMR (400 MHz, CDCl<sub>3</sub>) δ 8.24 (s, 1H), 7.38 (s, 1H), 4.14 (ddd, *J* = 4.0 Hz, 2.4 Hz, 0.8 Hz, 1H), 3.25 (dd, *J* = 5.2 Hz, 4.0 Hz, 1H), 2.74 (dd, *J* = 5.2 Hz, 2.4 Hz, 1H); <sup>13</sup>C NMR (100 MHz, CDCl<sub>3</sub>) δ 151.3, 147.4, 144.9, 130.8, 124.1, 50.5, 48.3; HRMS (ESI-TOF) calcd for C<sub>7</sub>H<sub>6</sub>Cl<sub>2</sub>NO [M+H]<sup>+</sup> (189.9826), found 189.9827.

#### 4-chloro-3-(oxiran-2-yl)pyridine (**1b**)

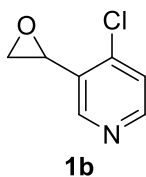

According to the General Procedure, the product **1b** was obtained as a colorless oil (49% yield in three steps) after silica gel chromatography (*n*-hexane/EtOAc = 20:1). <sup>1</sup>H NMR (400 MHz, CDCl<sub>3</sub>) δ 8.46-8.47 (m, 2H), 7.32 (d, *J* = 5.2 Hz, 1H), 4.19-4.21 (m, 1H), 3.25 (dd, *J* = 5.6 Hz, 4.4 Hz, 1H), 2.77 (dd, *J* = 5.6 Hz, 2.4 Hz, 1H); <sup>13</sup>C NMR (100 MHz, CDCl<sub>3</sub>) δ 149.9, 147.7, 143.3, 131.5, 124.0, 50.5, 48.7; HRMS (ESI-TOF) calcd for C<sub>7</sub>H<sub>7</sub>ClNO [M+H]<sup>+</sup> (156.0216), found 156.0214.

#### 4-chloro-2-methyl-5-(oxiran-2-yl)pyridine (**1c**)

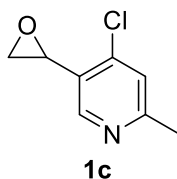

According to the General Procedure, the product **1c** was obtained as a light-yellow oil

(68% yield in three steps) after silica gel chromatography (*n*-hexane/EtOAc = 20:1). <sup>1</sup>H NMR (400 MHz, CD<sub>3</sub>OD) δ 8.11 (s, 1H), 7.30 (s, 1H), 4.06 (dd, *J* = 4.0 Hz, 2.4 Hz, 1H), 3.11 (dd, *J* = 5.6 Hz, 4.0 Hz, 1H), 2.67 (dd, *J* = 5.6 Hz, 2.4 Hz, 1H), 2.42 (s, 3H); <sup>13</sup>C NMR (100 MHz, CD<sub>3</sub>OD) δ 160.4, 147.3, 145.4, 130.7, 125.0, 50.8, 49.3, 23.4; HRMS (ESI-TOF) calcd for C<sub>8</sub>H<sub>9</sub>ClNO [M+H]<sup>+</sup> (170.0373), found 170.0370.

#### 4-chloro-2-fluoro-5-(oxiran-2-yl)pyridine (**1d**)

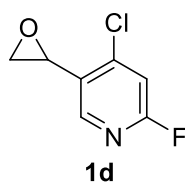

According to the General Procedure, the product **1d** was obtained as a light-yellow oil (50% yield in three steps) after silica gel chromatography (*n*-hexane/EtOAc = 20:1). <sup>1</sup>H NMR (400 MHz, CDCl<sub>3</sub>) δ 8.10 (s, 1H), 7.01 (d, *J* = 2.8 Hz, 1H), 4.13-4.15 (m, 1H), 3.23 (dd, *J* = 5.6 Hz, 4.0 Hz, 1H), 2.75 (dd, *J* = 5.6 Hz, 2.4 Hz, 1H); <sup>13</sup>C NMR (100 MHz, CDCl<sub>3</sub>) δ 163.2 (d, *J* = 239.2 Hz), 146.7 (d, *J* = 10.5 Hz), 145.5 (d, *J* = 16.8 Hz), 129.6 (d, *J* = 5.3 Hz), 110.0 (d, *J* = 40.8 Hz), 50.4, 48.4; HRMS (ESI-TOF) calcd for C<sub>7</sub>H<sub>6</sub>ClFNO [M+H]<sup>+</sup> (174.0122), found 174.0120.

#### 2-chloro-3-(oxiran-2-yl)pyridine (**1e**)

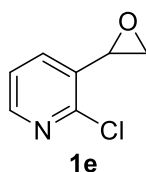

According to the General Procedure, the product **1e** was obtained as a light-yellow oil (66% yield in three steps) after silica gel chromatography (*n*-hexane/EtOAc = 20:1). <sup>1</sup>H NMR (400 MHz, CDCl<sub>3</sub>) δ 8.34 (dd, *J* = 4.8 Hz, 2.0 Hz, 1H), 7.59 (dd, *J* = 7.6 Hz, 2.0 Hz, 1H), 7.26 (dd, *J* = 7.6 Hz, 4.8 Hz, 1H), 4.17 (dd, *J* = 4.0 Hz, 2.8 Hz, 1H), 3.24 (dd, *J* = 5.6 Hz, 4.0 Hz, 1H), 2.67 (dd, *J* = 5.6 Hz, 2.8 Hz, 1H); <sup>13</sup>C NMR (100 MHz, CDCl<sub>3</sub>) δ 150.0, 148.7, 134.7, 132.7, 122.8, 50.7, 49.2; HRMS (ESI-TOF) calcd for C<sub>7</sub>H<sub>7</sub>ClNO [M+H]<sup>+</sup> (156.0216), found 156.0214.

**9-chloro-3,4,5,6-tetrahydro-2H-pyrido[3,4-g][1,4]oxazocin-6-ol (3aa)**

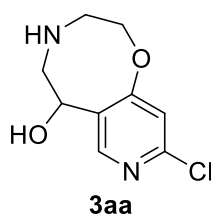

According to the General Procedure, the product **3aa** was obtained as a light-yellow oil after silica gel chromatography (CH<sub>2</sub>Cl<sub>2</sub>/MeOH = 150:1), 30.9 mg (72%). <sup>1</sup>H NMR (400 MHz, CD<sub>3</sub>OD) δ 7.75 (s, 1H), 6.44 (s, 1H), 5.12 (dd, *J* = 8.0 Hz, 2.8 Hz, 1H), 3.77 (dd, *J* = 11.6 Hz, 7.6 Hz, 1H), 3.64 (t, *J* = 5.6 Hz, 2H), 3.45 (dd, *J* = 11.6 Hz, 2.8 Hz, 1H), 3.30 (td, *J* = 5.6 Hz, 1.2 Hz, 2H); <sup>13</sup>C NMR (100 MHz, CD<sub>3</sub>OD) δ 160.5, 152.9, 144.6, 128.6, 101.9, 68.6, 62.5, 60.3, 49.2; HRMS (ESI-TOF) calcd for C<sub>9</sub>H<sub>12</sub>ClN<sub>2</sub>O<sub>2</sub> [M+H]<sup>+</sup> (215.0587), found 215.0588.

**9-chloro-3-methyl-3,4,5,6-tetrahydro-2H-pyrido[3,4-g][1,4]oxazocin-6-ol (3ab)**

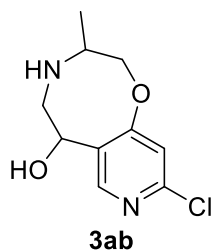

According to the General Procedure, the product **3ab** was obtained as a light-yellow oil after silica gel chromatography (CH<sub>2</sub>Cl<sub>2</sub>/MeOH = 150:1), 32.0 mg (70%). d.r. = 1:1. <sup>1</sup>H NMR (400 MHz, CD<sub>3</sub>OD) δ 7.84 (s, 1H), 6.52 (s, 1H), 5.18 (dd, *J* = 7.6 Hz, 2.4 Hz, 1H), 3.82-3.90 (m, 1H), 3.76 (dd, *J* = 11.6 Hz, 7.6 Hz, 1H), 3.57-3.67 (m, 2H), 3.49 (dd, *J* = 11.6 Hz, 2.4 Hz, 1H), 1.15 (d, *J* = 6.8 Hz, 3H); <sup>13</sup>C NMR (100 MHz, CD<sub>3</sub>OD) δ 160.2, 152.9, 144.7, 128.5, 102.1, 68.2, 64.4, 56.6, 53.3, 13.5; HRMS (ESI-TOF) calcd for C<sub>10</sub>H<sub>14</sub>ClN<sub>2</sub>O<sub>2</sub> [M+H]<sup>+</sup> (229.0744), found 229.0746.

**9-chloro-3-isobutyl-3,4,5,6-tetrahydro-2H-pyrido[3,4-g][1,4]oxazocin-6-ol (3ac)**

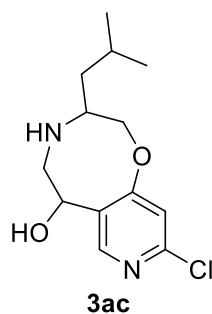

According to the General Procedure, the product **3ac** was obtained as a light-yellow oil after silica gel chromatography ( $\text{CH}_2\text{Cl}_2/\text{MeOH} = 200:1$ ), 33.0 mg (61%). d.r. = 1:1.  $^1\text{H}$  NMR (400 MHz,  $\text{CD}_3\text{OD}$ )  $\delta$  7.73 (s, 0.47H), 7.72 (s, 0.47H), 6.42 (s, 0.5H), 6.41 (s, 0.5H), 5.08-5.13 (m, 1H), 3.61-3.73 (m, 2H), 3.47-3.57 (m, 2H), 3.38 (dd,  $J = 11.6$  Hz, 2.8 Hz, 0.55H), 3.30 (dd,  $J = 11.6$  Hz, 2.4 Hz, 0.51H), 1.34-1.60 (m, 2H), 1.14-1.24 (m, 1H), 0.82-0.87 (m, 6H);  $^{13}\text{C}$  NMR (100 MHz,  $\text{CD}_3\text{OD}$ )  $\delta$  160.9, 160.6, 152.89, 152.86, 144.8, 144.7, 128.2, 101.83, 101.75, 68.2, 68.0, 63.44, 63.41, 56.6, 56.4, 56.1, 55.7, 38.3, 38.1, 25.9, 25.6, 23.8, 23.6, 22.4, 22.2; HRMS (ESI-TOF) calcd for  $\text{C}_{13}\text{H}_{20}\text{ClN}_2\text{O}_2$   $[\text{M}+\text{H}]^+$  (271.1213), found 271.1216.

### 9-chloro-3,3-dimethyl-3,4,5,6-tetrahydro-2H-pyrido[3,4-g][1,4]oxazocin-6-ol

**(3ad)**

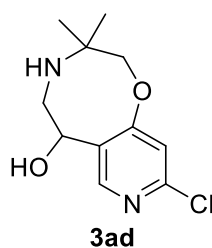

According to the General Procedure, the product **3ad** was obtained as a colorless oil after silica gel chromatography ( $\text{CH}_2\text{Cl}_2/\text{MeOH} = 200:1$ ), 20.4 mg (42%).  $^1\text{H}$  NMR (400 MHz,  $\text{CD}_3\text{OD}$ )  $\delta$  7.75 (s, 1H), 6.61 (s, 1H), 4.96 (dd,  $J = 7.2$  Hz, 2.4 Hz, 1H), 3.81 (dd,  $J = 11.6$  Hz, 7.2 Hz, 1H), 3.55-3.63 (m, 3H), 1.30 (s, 6H);  $^{13}\text{C}$  NMR (100 MHz,  $\text{CD}_3\text{OD}$ )  $\delta$  158.6, 152.5, 144.7, 130.1, 104.9, 67.7, 67.4, 60.6, 59.3, 23.3, 23.2; HRMS (ESI-TOF) calcd for  $\text{C}_{11}\text{H}_{16}\text{ClN}_2\text{O}_2$   $[\text{M}+\text{H}]^+$  (243.0900), found 243.0902.

**9-chloro-2-methyl-3,4,5,6-tetrahydro-2H-pyrido[3,4-g][1,4]oxazocin-6-ol (3ae)**

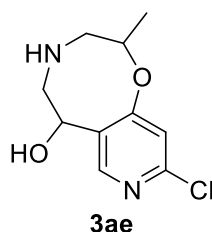

According to the General Procedure, the product **3ae** was obtained as a colorless oil after silica gel chromatography (CH<sub>2</sub>Cl<sub>2</sub>/MeOH = 200:1), 29.7 mg (65%). d.r. = 1:1. <sup>1</sup>H NMR (400 MHz, CD<sub>3</sub>OD) δ 7.75 (s, 1H), 6.43 (s, 1H), 5.11 (d, *J* = 6.4 Hz, 1H), 3.89-3.96 (m, 1H), 3.72-3.82 (m, 1H), 3.43-3.55 (m, 1H), 3.11-3.16 (m, 2H), 1.10 (d, *J* = 6.4 Hz, 3H); <sup>13</sup>C NMR (100 MHz, CD<sub>3</sub>OD) δ 160.6, 153.0, 152.9, 144.7, 144.6, 128.44, 128.42, 102.0, 101.9, 68.6, 66.8, 66.7, 63.23, 63.20, 54.54, 54.49, 20.93, 20.87; HRMS (ESI-TOF) calcd for C<sub>10</sub>H<sub>14</sub>ClN<sub>2</sub>O<sub>2</sub> [M+H]<sup>+</sup> (229.0744), found 229.0746.

**9-chloro-2,2-dimethyl-3,4,5,6-tetrahydro-2H-pyrido[3,4-g][1,4]oxazocin-6-ol (3af)**

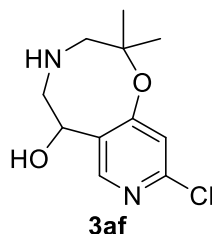

According to the General Procedure, the product **3af** was obtained as a light-yellow oil after silica gel chromatography (CH<sub>2</sub>Cl<sub>2</sub>/MeOH = 150:1), 33.0 mg (68%). <sup>1</sup>H NMR (400 MHz, CD<sub>3</sub>OD) δ 7.76 (s, 1H), 6.46 (s, 1H), 5.11 (dd, *J* = 7.2 Hz, 2.8 Hz, 1H), 3.81 (dd, *J* = 12.0 Hz, 7.2 Hz, 1H), 3.57 (dd, *J* = 12.0 Hz, 2.8 Hz, 1H), 3.14 (d, *J* = 14.8 Hz, 1H), 3.08 (d, *J* = 14.8 Hz, 1H), 1.15 (s, 3H), 1.14 (s, 3H); <sup>13</sup>C NMR (100 MHz, CD<sub>3</sub>OD) δ 161.2, 152.9, 144.6, 128.3, 102.3, 73.4, 68.6, 65.0, 58.8, 27.50, 27.47; HRMS (ESI-TOF) calcd for C<sub>11</sub>H<sub>16</sub>ClN<sub>2</sub>O<sub>2</sub> [M+H]<sup>+</sup> (243.0900), found 243.0902.

**2-chloro-5,6,7,7a,8,9,10,10a-octahydrocyclopenta[*b*]pyrido[3,4-*g*][1,4]oxazocin-5-**

**ol (3ag)**

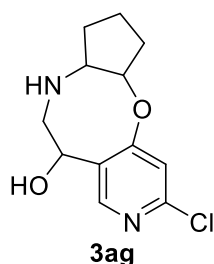

According to the General Procedure, the product **3ag** was obtained as a light-yellow oil after silica gel chromatography (CH<sub>2</sub>Cl<sub>2</sub>/MeOH = 200:1), 38.2 mg (75%). d.r. = 1:1. <sup>1</sup>H NMR (400 MHz, CD<sub>3</sub>OD) δ 7.74 (s, 0.43H), 7.72 (s, 0.47H), 6.48 (s, 0.45H), 6.47 (s, 0.48H), 5.07-5.13 (m, 1H), 4.03-4.11 (m, 1H), 3.65-3.76 (m, 2H), 3.36-3.41 (m, 1H), 1.81-1.91 (m, 2H), 1.48-1.78 (m, 4H); <sup>13</sup>C NMR (100 MHz, CD<sub>3</sub>OD) δ 160.4, 160.3, 152.9, 152.8, 144.6, 144.5, 128.6, 102.4, 75.2, 74.9, 68.2, 68.1, 64.2, 64.1, 57.5, 57.4, 33.0, 32.7, 26.0, 25.5, 20.9, 20.8; HRMS (ESI-TOF) calcd for C<sub>12</sub>H<sub>16</sub>ClN<sub>2</sub>O<sub>2</sub> [M+H]<sup>+</sup> (255.0900), found 255.0901.

**2-chloro-6,7,7a,8,9,10,11,11a-octahydro-5H-benzo[b]pyrido[3,4-g][1,4]oxazocin-5-ol (3ah)**

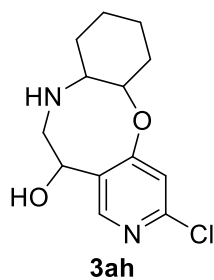

According to the General Procedure, the product **3ah** was obtained as a light-yellow oil after silica gel chromatography (CH<sub>2</sub>Cl<sub>2</sub>/MeOH = 200:1), 39.8 mg (74%). d.r. = 1.2:1. <sup>1</sup>H NMR (400 MHz, CD<sub>3</sub>OD) δ 7.74 (s, 0.38H), 7.70 (s, 0.55H), 6.44 (s, 0.41H), 6.41 (s, 0.59H), 5.12 (dd, *J* = 7.6 Hz, 2.8 Hz, 0.6H), 5.06 (dd, *J* = 7.6 Hz, 2.0 Hz, 0.44H), 3.75 (dd, *J* = 11.2 Hz, 8.0 Hz, 0.6H), 3.67 (dd, *J* = 11.6 Hz, 7.6 Hz, 0.46H), 3.48-3.56 (m, 1H), 3.42 (dd, *J* = 11.6 Hz, 2.0 Hz, 0.45H), 3.37 (dd, *J* = 11.2 Hz, 3.2 Hz, 0.63H), 3.21-3.30 (m, 1H), 1.94-1.97 (m, 1H), 1.66-1.68 (m, 3H), 1.38-1.49 (m, 1H), 1.19-1.37 (m, 3H); <sup>13</sup>C NMR (100 MHz, CD<sub>3</sub>OD) δ 160.39, 160.38, 152.9, 152.7,

144.7, 144.5, 128.34, 128.32, 102.2, 102.1, 71.34, 71.31, 68.3, 68.1, 61.5, 61.3, 56.81, 56.78, 35.7, 35.3, 29.4, 28.8, 25.9, 25.49, 25.42; HRMS (ESI-TOF) calcd for  $C_{13}H_{18}ClN_2O_2$   $[M+H]^+$  (269.1057), found 269.1056.

**9-chloro-4-methyl-3,4,5,6-tetrahydro-2H-pyrido[3,4-g][1,4]oxazocin-6-ol (3ai)**

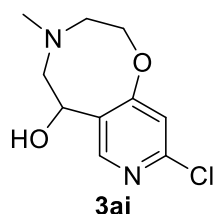

According to the General Procedure, the product **3ai** was obtained as a light-yellow oil after silica gel chromatography ( $CH_2Cl_2/MeOH = 150:1$ ), 32.0 mg (70%).  $^1H$  NMR (400 MHz,  $CD_3OD$ )  $\delta$  8.25 (s, 1H), 7.00 (s, 1H), 5.10 (dd,  $J = 9.6$  Hz, 4.8 Hz, 1H), 4.30 (ddd,  $J = 12.4$  Hz, 6.8 Hz, 3.2 Hz, 1H), 3.94 (ddd,  $J = 12.4$  Hz, 6.8 Hz, 3.2 Hz, 1H), 2.99 (dd,  $J = 12.4$  Hz, 4.8 Hz, 1H), 2.75 (ddd,  $J = 15.2$  Hz, 6.8 Hz, 2.8 Hz, 1H), 2.51-2.57 (m, 1H), 2.42 (dd,  $J = 12.4$  Hz, 9.6 Hz, 1H), 2.30 (s, 3H);  $^{13}C$  NMR (100 MHz,  $CD_3OD$ )  $\delta$  167.1, 151.7, 148.5, 134.9, 118.1, 75.3, 67.0, 66.8, 57.0, 45.6; HRMS (ESI-TOF) calcd for  $C_{10}H_{14}ClN_2O_2$   $[M+H]^+$  (229.0744), found 229.0745.

**9-chloro-4-ethyl-3,4,5,6-tetrahydro-2H-pyrido[3,4-g][1,4]oxazocin-6-ol (3aj)**

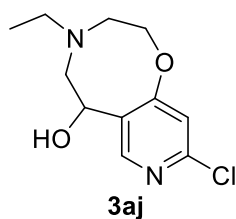

According to the General Procedure, the product **3aj** was obtained as a light-yellow oil after silica gel chromatography ( $CH_2Cl_2/MeOH = 150:1$ ), 38.3 mg (79%).  $^1H$  NMR (400 MHz,  $CD_3OD$ )  $\delta$  8.23 (s, 1H), 7.00 (s, 1H), 5.06 (dd,  $J = 9.6$  Hz, 5.2 Hz, 1H), 4.25 (ddd,  $J = 12.0$  Hz, 5.6 Hz, 3.2 Hz, 1H), 3.81-3.86 (m, 1H), 3.03 (dd,  $J = 12.0$  Hz, 5.2 Hz, 1H), 2.77 (ddd,  $J = 15.2$  Hz, 7.6 Hz, 2.8 Hz, 1H), 2.59 (ddd,  $J = 15.2$  Hz, 5.6 Hz, 2.8 Hz, 1H), 2.49 (q,  $J = 7.2$  Hz, 2H), 2.37 (dd,  $J = 12.0$  Hz, 9.6 Hz, 1H),

0.83 (t,  $J = 7.2$  Hz, 3H);  $^{13}\text{C}$  NMR (100 MHz,  $\text{CD}_3\text{OD}$ )  $\delta$  167.7, 151.6, 148.0, 135.8, 118.2, 76.9, 67.5, 64.5, 55.0, 52.4, 12.7; HRMS (ESI-TOF) calcd for  $\text{C}_{11}\text{H}_{16}\text{ClN}_2\text{O}_2$   $[\text{M}+\text{H}]^+$  (243.0900), found 243.0904.

#### 4-butyl-9-chloro-3,4,5,6-tetrahydro-2H-pyrido[3,4-g][1,4]oxazocin-6-ol (**3ak**)

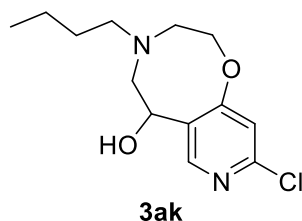

According to the General Procedure, the product **3ak** was obtained as a light-yellow oil after silica gel chromatography ( $\text{CH}_2\text{Cl}_2/\text{MeOH} = 200:1$ ), 43.9 mg (81%).  $^1\text{H}$  NMR (400 MHz,  $\text{CD}_3\text{OD}$ )  $\delta$  8.52 (s, 1H), 7.30 (s, 1H), 5.39 (dd,  $J = 9.6$  Hz, 5.2 Hz, 1H), 4.53-4.57 (m, 1H), 4.12-4.17 (m, 1H), 3.29-3.33 (m, 1H), 3.10-3.16 (m, 1H), 2.90-2.94 (m, 1H), 2.61-2.78 (m, 3H), 1.45-1.51 (m, 2H), 1.22-1.31 (m, 2H), 1.00 (t,  $J = 7.2$  Hz, 3H);  $^{13}\text{C}$  NMR (100 MHz,  $\text{CD}_3\text{OD}$ )  $\delta$  168.0, 151.6, 147.7, 135.7, 118.0, 76.8, 67.7, 64.6, 58.2, 56.5, 30.8, 20.9, 14.1; HRMS (ESI-TOF) calcd for  $\text{C}_{13}\text{H}_{20}\text{ClN}_2\text{O}_2$   $[\text{M}+\text{H}]^+$  (271.1213), found 271.1214.

#### 4-benzyl-9-chloro-3,4,5,6-tetrahydro-2H-pyrido[3,4-g][1,4]oxazocin-6-ol (**3al**)

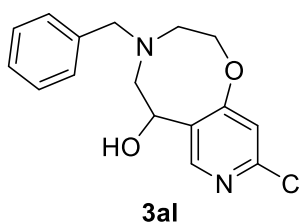

According to the General Procedure, the product **3al** was obtained as a light-yellow oil after silica gel chromatography ( $\text{CH}_2\text{Cl}_2/\text{MeOH} = 200:1$ ), 41.4 mg (68%).  $^1\text{H}$  NMR (400 MHz,  $\text{CD}_3\text{OD}$ )  $\delta$  8.32 (s, 1H), 7.33 (s, 1H), 7.09-7.14 (m, 5H), 4.96 (dd,  $J = 8.0$  Hz, 4.0 Hz, 1H), 3.68 (d,  $J = 13.6$  Hz, 1H), 3.48-3.59 (m, 3H), 2.72-2.78 (m, 2H), 2.58-2.65 (m, 2H);  $^{13}\text{C}$  NMR (100 MHz,  $\text{CD}_3\text{OD}$ )  $\delta$  151.2, 150.4, 145.0, 140.2, 137.4, 130.1, 129.3, 128.1, 125.2, 68.6, 61.2, 61.0, 60.9, 58.1; HRMS (ESI-TOF)



calcd for C<sub>16</sub>H<sub>18</sub>ClN<sub>2</sub>O<sub>2</sub> [M+H]<sup>+</sup> (305.1057), found 305.1051.

**9-chloro-4-(thiophen-2-ylmethyl)-3,4,5,6-tetrahydro-2H-pyrido[3,4-g][1,4]oxazocin-6-ol (3am)**

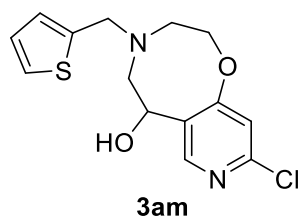

According to the General Procedure, the product **3am** was obtained as a light-yellow oil after silica gel chromatography (CH<sub>2</sub>Cl<sub>2</sub>/MeOH = 200:1), 33.6 mg (54%). <sup>1</sup>H NMR (400 MHz, CD<sub>3</sub>OD) δ 8.40 (s, 1H), 7.39 (s, 1H), 7.16 (dd, *J* = 4.4 Hz, 2.0 Hz, 1H), 6.80-6.82 (m, 2H), 5.03 (dd, *J* = 8.0 Hz, 3.6 Hz, 1H), 3.84-3.92 (m, 2H), 3.46-3.56 (m, 2H), 2.80 (dd, *J* = 13.6 Hz, 3.6 Hz, 1H), 2.69-2.76 (m, 1H), 2.60-2.65 (m, 2H); <sup>13</sup>C NMR (100 MHz, CD<sub>3</sub>OD) δ 151.3, 150.5, 145.1, 142.8, 137.4, 127.6, 127.4, 126.1, 125.2, 68.6, 61.0, 60.8, 57.4, 54.8; HRMS (ESI-TOF) calcd for C<sub>14</sub>H<sub>16</sub>ClN<sub>2</sub>O<sub>2</sub>S [M+H]<sup>+</sup> (311.0621), found 311.0617.

**4-butyl-3,4,5,6-tetrahydro-2H-pyrido[3,4-g][1,4]oxazocin-6-ol (3bk)**

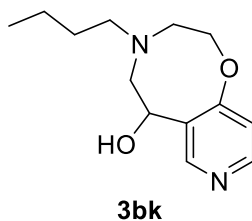

According to the General Procedure, the product **3bk** was obtained as a colorless oil after silica gel chromatography (CH<sub>2</sub>Cl<sub>2</sub>/MeOH = 200:1), 39.7 mg (84%). <sup>1</sup>H NMR (400 MHz, CD<sub>3</sub>OD) δ 8.64 (s, 1H), 8.28 (d, *J* = 5.2 Hz, 1H), 7.37 (d, *J* = 5.2 Hz, 1H), 5.07 (dd, *J* = 8.8 Hz, 3.2 Hz, 1H), 3.48-3.58 (m, 2H), 2.70-2.77 (m, 2H), 2.46-2.62 (m, 4H), 1.33-1.41 (m, 2H), 1.14-1.27 (m, 2H), 0.82 (t, *J* = 7.2 Hz, 3H); <sup>13</sup>C NMR (100 MHz, CD<sub>3</sub>OD) δ 150.1, 149.8, 143.6, 138.3, 125.8, 68.3, 61.8, 60.6, 57.8, 56.1, 30.0, 21.5, 14.4; HRMS (ESI-TOF) calcd for C<sub>13</sub>H<sub>21</sub>N<sub>2</sub>O<sub>2</sub> [M+H]<sup>+</sup> (237.1603), found

237.1602.

**4-isopropyl-3,4,5,6-tetrahydro-2H-pyrido[3,4-g][1,4]oxazocin-6-ol (3bq)**

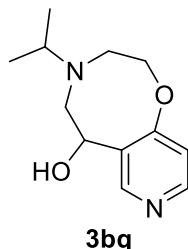

According to the General Procedure, the product **3bq** was obtained as a colorless oil after silica gel chromatography (CH<sub>2</sub>Cl<sub>2</sub>/MeOH = 150:1), 29.3 mg (66%). <sup>1</sup>H NMR (400 MHz, CD<sub>3</sub>OD) δ 8.64 (s, 1H), 8.29 (d, *J* = 5.2 Hz, 1H), 7.37 (d, *J* = 5.2 Hz, 1H), 5.00 (dd, *J* = 8.8 Hz, 3.2 Hz, 1H), 3.43-3.55 (m, 2H), 2.88-2.99 (m, 1H), 2.46-2.77 (m, 4H), 0.95 (d, *J* = 6.4 Hz, 3H), 0.91 (d, *J* = 6.4 Hz, 3H); <sup>13</sup>C NMR (100 MHz, CD<sub>3</sub>OD) δ 150.2, 149.8, 143.7, 138.3, 125.8, 68.9, 61.6, 58.1, 53.5, 19.3, 17.3; HRMS (ESI-TOF) calcd for C<sub>12</sub>H<sub>19</sub>N<sub>2</sub>O<sub>2</sub> [M+H]<sup>+</sup> (223.1447), found 223.1443.

**4-cyclohexyl-3,4,5,6-tetrahydro-2H-pyrido[3,4-g][1,4]oxazocin-6-ol (3br)**

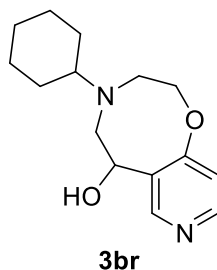

According to the General Procedure, the product **3br** was obtained as a colorless oil after silica gel chromatography (CH<sub>2</sub>Cl<sub>2</sub>/MeOH = 180:1), 26.2 mg (50%). <sup>1</sup>H NMR (400 MHz, CD<sub>3</sub>OD) δ 8.63 (s, 1H), 8.28 (d, *J* = 5.2 Hz, 1H), 7.37 (d, *J* = 5.2 Hz, 1H), 4.98 (dd, *J* = 8.4 Hz, 3.2 Hz, 1H), 3.41-3.54 (m, 2H), 2.81 (dd, *J* = 13.6 Hz, 3.2 Hz, 1H), 2.59-2.71 (m, 2H), 2.49-2.56 (m, 1H), 2.35-2.46 (m, 1H), 1.64-1.73 (m, 4H), 0.97-1.22 (m, 6H); <sup>13</sup>C NMR (100 MHz, CD<sub>3</sub>OD) δ 150.2, 149.7, 143.7, 138.4, 125.7, 69.1, 62.6, 61.9, 58.6, 54.1, 30.8, 29.3, 27.3; HRMS (ESI-TOF) calcd for C<sub>15</sub>H<sub>23</sub>N<sub>2</sub>O<sub>2</sub> [M+H]<sup>+</sup> (263.1760), found 263.1756.

#### 4-benzyl-3,4,5,6-tetrahydro-2H-pyrido[3,4-g][1,4]oxazocin-6-ol (**3bl**)

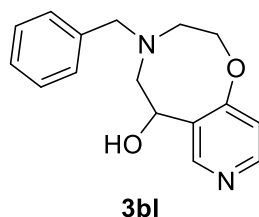

According to the General Procedure, the product **3bl** was obtained as a light-yellow oil after silica gel chromatography (CH<sub>2</sub>Cl<sub>2</sub>/MeOH = 150:1), 43.3 mg (80%). <sup>1</sup>H NMR (400 MHz, CD<sub>3</sub>OD) δ 8.54 (s, 1H), 8.24 (d, *J* = 5.2 Hz, 1H), 7.30 (d, *J* = 5.6 Hz, 1H), 7.09-7.20 (m, 5H), 5.05 (dd, *J* = 8.4 Hz, 3.6 Hz, 1H), 3.74 (d, *J* = 13.6 Hz, 1H), 3.61 (d, *J* = 13.6 Hz, 1H), 3.47-3.58 (m, 2H), 2.72-2.79 (m, 2H), 2.59-2.66 (m, 2H); <sup>13</sup>C NMR (100 MHz, CD<sub>3</sub>OD) δ 150.2, 149.6, 143.7, 140.2, 138.4, 130.2, 129.3, 128.2, 125.8, 68.7, 61.5, 60.9, 57.9; HRMS (ESI-TOF) calcd for C<sub>16</sub>H<sub>19</sub>N<sub>2</sub>O<sub>2</sub> [M+H]<sup>+</sup> (271.1447), found 271.1442.

#### 4-(4-methoxybenzyl)-3,4,5,6-tetrahydro-2H-pyrido[3,4-g][1,4]oxazocin-6-ol (**3bs**)

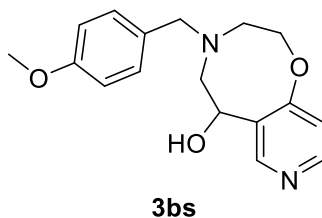

According to the General Procedure, the product **3bs** was obtained as a colorless oil after silica gel chromatography (CH<sub>2</sub>Cl<sub>2</sub>/MeOH = 150:1), 48.7 mg (81%). <sup>1</sup>H NMR (400 MHz, CD<sub>3</sub>OD) δ 8.53 (s, 1H), 8.24 (d, *J* = 5.2 Hz, 1H), 7.30 (d, *J* = 5.2 Hz, 1H), 7.07-7.11 (m, 2H), 6.70-6.74 (m, 2H), 5.02 (dd, *J* = 8.0 Hz, 3.6 Hz, 1H), 3.63-3.69 (m, 1H), 3.66 (s, 3H), 3.46-3.57 (m, 3H), 2.69-2.76 (m, 2H), 2.57-2.62 (m, 2H); <sup>13</sup>C NMR (100 MHz, CD<sub>3</sub>OD) δ 160.3, 150.2, 149.6, 143.7, 138.5, 132.0, 131.3, 125.8, 114.7, 68.7, 61.3, 60.9, 60.2, 57.7, 55.7; HRMS (ESI-TOF) calcd for C<sub>17</sub>H<sub>21</sub>N<sub>2</sub>O<sub>3</sub> [M+H]<sup>+</sup> (301.1552), found 301.1548.

**4-(thiophen-2-ylmethyl)-3,4,5,6-tetrahydro-2H-pyrido[3,4-g][1,4]oxazocin-6-ol**  
**(3bm)**

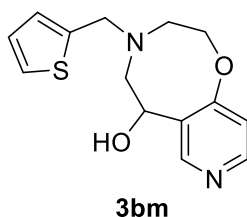

According to the General Procedure, the product **3bm** was obtained as a colorless oil after silica gel chromatography ( $\text{CH}_2\text{Cl}_2/\text{MeOH} = 150:1$ ), 33.2 mg (60%).  $^1\text{H}$  NMR (400 MHz,  $\text{CD}_3\text{OD}$ )  $\delta$  8.60 (s, 1H), 8.26 (d,  $J = 5.2$  Hz, 1H), 7.34 (d,  $J = 5.2$  Hz, 1H), 7.17 (dd,  $J = 4.8$  Hz, 0.8 Hz, 1H), 6.81-6.83 (m, 2H), 5.09 (dd,  $J = 8.4$  Hz, 3.6 Hz, 1H), 3.90 (dd,  $J = 18.0$  Hz, 14.8 Hz, 2H), 3.46-3.56 (m, 2H), 2.80 (dd,  $J = 13.6$  Hz, 3.6 Hz, 1H), 2.69-2.75 (m, 1H), 2.58-2.65 (m, 2H);  $^{13}\text{C}$  NMR (100 MHz,  $\text{CD}_3\text{OD}$ )  $\delta$  150.3, 149.7, 143.7, 142.7, 138.4, 127.7, 127.4, 126.2, 125.8, 68.8, 61.0, 57.2, 54.7; HRMS (ESI-TOF) calcd for  $\text{C}_{14}\text{H}_{17}\text{N}_2\text{O}_2\text{S}$   $[\text{M}+\text{H}]^+$  (277.1011), found 277.1007.

**3-benzyl-3,4,5,6-tetrahydro-2H-pyrido[3,4-g][1,4]oxazocin-6-ol (3bt)**

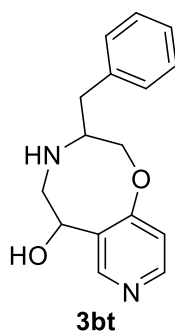

According to the General Procedure, the product **3bt** was obtained as a light-yellow oil after silica gel chromatography ( $\text{CH}_2\text{Cl}_2/\text{MeOH} = 120:1$ ), 35.7 mg (66%), d.r. = 1:1.  $^1\text{H}$  NMR (400 MHz,  $\text{CD}_3\text{OD}$ )  $\delta$  8.58 (s, 1H), 8.28 (d,  $J = 5.6$  Hz, 1H), 7.36 (d,  $J = 5.6$  Hz, 1H), 7.15-7.19 (m, 2H), 7.06-7.11 (m, 3H), 5.02-5.09 (m, 1H), 3.41-3.47 (m, 1H), 3.28-3.36 (m, 1H), 2.78-2.93 (m, 2H), 2.56-2.70 (m, 3H);  $^{13}\text{C}$  NMR (100 MHz,  $\text{CD}_3\text{OD}$ )  $\delta$  145.0, 149.90, 149.87, 143.64, 143.57, 140.1, 140.0, 138.6, 138.5, 130.3, 129.6, 129.5, 127.40, 127.38, 125.9, 69.1, 68.7, 64.2, 63.9, 62.3, 61.8, 53.9, 53.5, 38.7,

38.5; HRMS (ESI-TOF) calcd for C<sub>16</sub>H<sub>19</sub>N<sub>2</sub>O<sub>2</sub> [M+H]<sup>+</sup> (271.1447), found 271.1443.

**4-benzyl-9-methyl-3,4,5,6-tetrahydro-2H-pyrido[3,4-g][1,4]oxazocin-6-ol (3cl)**

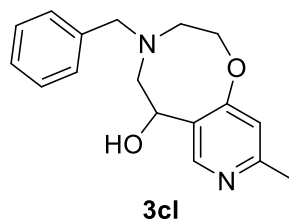

According to the General Procedure, the product **3cl** was obtained as a light-yellow oil after silica gel chromatography (CH<sub>2</sub>Cl<sub>2</sub>/MeOH = 150:1), 44.9 mg (79%). <sup>1</sup>H NMR (400 MHz, CD<sub>3</sub>OD) δ 8.66 (s, 1H), 7.35-7.47 (m, 6H), 5.27 (dd, *J* = 8.4 Hz, 3.6 Hz, 1H), 3.99 (d, *J* = 13.6 Hz, 1H), 3.85 (d, *J* = 13.6 Hz, 1H), 3.74-3.85 (m, 2H), 2.98-3.04 (m, 2H), 2.84-2.90 (m, 2H), 2.65 (s, 3H); <sup>13</sup>C NMR (100 MHz, CD<sub>3</sub>OD) δ 159.3, 149.3, 143.8, 140.2, 135.3, 130.1, 129.3, 128.1, 125.0, 68.5, 61.6, 60.90, 60.86, 57.9, 23.2; HRMS (ESI-TOF) calcd for C<sub>17</sub>H<sub>21</sub>N<sub>2</sub>O<sub>2</sub> [M+H]<sup>+</sup> (285.1603), found 285.1599.

**4-benzyl-9-fluoro-3,4,5,6-tetrahydro-2H-pyrido[3,4-g][1,4]oxazocin-6-ol (3dl)**

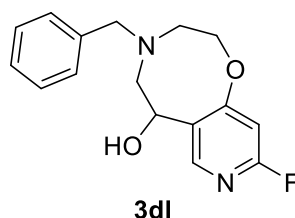

According to the General Procedure, the product **3dl** was obtained as a light-yellow oil after silica gel chromatography (CH<sub>2</sub>Cl<sub>2</sub>/MeOH = 150:1), 46.1 mg (80%). <sup>1</sup>H NMR (400 MHz, CD<sub>3</sub>OD) δ 8.18 (s, 1H), 7.08-7.19 (m, 5H), 7.01 (d, *J* = 2.4 Hz, 1H), 4.97 (dd, *J* = 8.0 Hz, 3.6 Hz, 1H), 3.70 (d, *J* = 13.6 Hz, 1H), 3.59 (d, *J* = 13.6 Hz, 1H), 3.47-3.59 (m, 2H), 2.71-2.78 (m, 2H), 2.58-2.64 (m, 2H); <sup>13</sup>C NMR (100 MHz, CD<sub>3</sub>OD) δ 164.1 (d, *J* = 237.4 Hz), 148.2 (d, *J* = 16.1 Hz), 146.7 (d, *J* = 10.8 Hz), 140.3, 136.1 (d, *J* = 5.1 Hz), 130.2, 129.3, 128.1, 110.9 (d, *J* = 40.5 Hz), 68.5, 61.5, 61.0, 60.9, 58.1; HRMS (ESI-TOF) calcd for C<sub>16</sub>H<sub>18</sub>FN<sub>2</sub>O<sub>2</sub> [M+H]<sup>+</sup> (289.1352),

found 289.1347.

**4-benzyl-3,4,5,6-tetrahydro-2H-pyrido[3,2-g][1,4]oxazocin-6-ol (3el)**

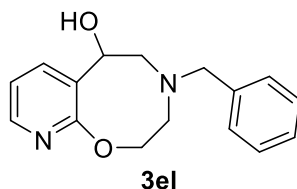

According to the General Procedure, the product **3el** was obtained as a colorless oil after silica gel chromatography (CH<sub>2</sub>Cl<sub>2</sub>/MeOH = 150:1), 44.9 mg (83%). <sup>1</sup>H NMR (400 MHz, CD<sub>3</sub>OD) δ 8.12 (dd, *J* = 4.8 Hz, 2.0 Hz, 1H), 7.86-7.88 (m, 1H), 7.25 (dd, *J* = 8.0 Hz, 4.8 Hz, 1H), 7.08-7.21 (m, 5H), 4.96 (dd, *J* = 8.4 Hz, 3.2 Hz, 1H), 3.73 (d, *J* = 13.6 Hz, 1H), 3.58 (d, *J* = 13.6 Hz, 1H), 3.46-3.57 (m, 2H), 2.70-2.77 (m, 2H), 2.50-2.61 (m, 2H); <sup>13</sup>C NMR (100 MHz, CD<sub>3</sub>OD) δ 149.6, 149.1, 140.3, 139.2, 138.7, 130.1, 129.3, 128.1, 124.5, 69.3, 61.5, 60.9, 60.8, 57.7; HRMS (ESI-TOF) calcd for C<sub>16</sub>H<sub>19</sub>N<sub>2</sub>O<sub>2</sub> [M+H]<sup>+</sup> (271.1447), found 271.1442.

**4-(thiophen-2-ylmethyl)-3,4,5,6-tetrahydro-2H-pyrido[3,2-g][1,4]oxazocin-6-ol (3em)**

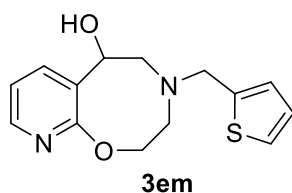

According to the General Procedure, the product **3em** was obtained as a light-yellow oil after silica gel chromatography (CH<sub>2</sub>Cl<sub>2</sub>/MeOH = 150:1), 33.7 mg (61%). <sup>1</sup>H NMR (400 MHz, CD<sub>3</sub>OD) δ 8.15 (dd, *J* = 4.8 Hz, 2.0 Hz, 1H), 7.93-7.96 (m, 1H), 7.30 (dd, *J* = 7.6 Hz, 4.8 Hz, 1H), 7.17 (dd, *J* = 4.8 Hz, 1.6 Hz, 1H), 6.82-6.85 (m, 2H), 5.01 (dd, *J* = 8.4 Hz, 3.2 Hz, 1H), 3.87-3.95 (m, 2H), 3.48-3.64 (m, 2H), 2.71-2.81 (m, 2H), 2.52-2.64 (m, 2H); <sup>13</sup>C NMR (100 MHz, CD<sub>3</sub>OD) δ 149.6, 149.2, 142.7, 139.2, 138.8, 127.7, 127.4, 126.1, 124.5, 69.4, 61.0, 60.9, 57.1, 54.6; HRMS (ESI-TOF) calcd for C<sub>14</sub>H<sub>17</sub>N<sub>2</sub>O<sub>2</sub>S [M+H]<sup>+</sup> (277.1011), found 277.1009.

### 2-phenyl-3,4,5,6-tetrahydro-2H-pyrido[3,2-g][1,4]oxazocin-6-ol (**3eu**)

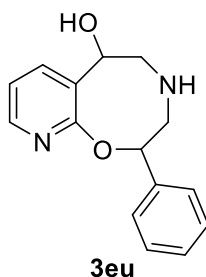

According to the General Procedure, the product **3eu** was obtained as a light-yellow oil after silica gel chromatography ( $\text{CH}_2\text{Cl}_2/\text{MeOH} = 200:1$ ), 31.8 mg (62%), d.r. = 1:1.  $^1\text{H}$  NMR (400 MHz,  $\text{CD}_3\text{OD}$ )  $\delta$  7.74-7.75 (m, 1H), 7.33-7.40 (m, 3H), 7.22-7.25 (m, 2H), 7.14-7.17 (m, 1H), 6.44-6.47 (m, 1H), 4.98-5.01 (m, 1H), 4.84-4.89 (m, 1H), 3.40-3.66 (m, 3H), 3.24-3.37 (m, 1H);  $^{13}\text{C}$  NMR (100 MHz,  $\text{CD}_3\text{OD}$ )  $\delta$  163.0, 162.9, 148.1, 144.2, 144.1, 134.34, 134.25, 129.3, 128.6, 127.3, 126.4, 113.49, 113.46, 73.6, 73.5, 68.9, 68.8, 60.90, 60.85, 54.45, 54.43; HRMS (ESI-TOF) calcd for  $\text{C}_{15}\text{H}_{17}\text{N}_2\text{O}_2$   $[\text{M}+\text{H}]^+$  (257.1290), found 257.1288.

### *tert*-butyl (*Z*)-9-chloro-3-methyl-2,3-dihydro-4H-pyrido[3,4-g][1,4]oxazocine-4-carboxylate (**4**)

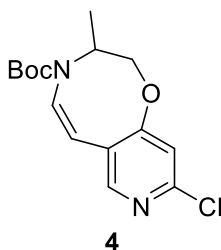

The product **4** was obtained as a yellow oil after silica gel chromatography ( $\text{CH}_2\text{Cl}_2/\text{MeOH} = 400:1$ ).  $^1\text{H}$  NMR (400 MHz,  $\text{CD}_3\text{OD}$ )  $\delta$  8.54 (s, 1H), 7.55 (s, 1H), 7.53 (d,  $J = 3.2$  Hz, 1H), 6.70 (d,  $J = 3.2$  Hz, 1H), 4.88-4.95 (m, 1H), 4.28-4.38 (m, 2H), 1.58 (d,  $J = 7.2$  Hz, 3H), 1.28 (s, 9H);  $^{13}\text{C}$  NMR (100 MHz,  $\text{CD}_3\text{OD}$ )  $\delta$  154.4, 143.7, 143.1, 143.0, 129.0, 126.4, 106.3, 103.1, 83.2, 70.2, 52.2, 27.8, 16.7; HRMS (ESI-TOF) calcd for  $\text{C}_{15}\text{H}_{20}\text{ClN}_2\text{O}_3$   $[\text{M}+\text{H}]^+$  (311.1162), found 311.1158.

### 6-acetoxy-4-benzyl-3,4,5,6-tetrahydro-2H-pyrido[3,2-g][1,4]oxazocin-4-ium

### acetate (**5**)

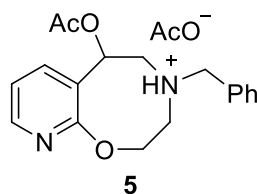

The product **5** was obtained as a light-yellow oil after silica gel chromatography ( $\text{CH}_2\text{Cl}_2/\text{MeOH} = 300:1$ ).  $^1\text{H}$  NMR (400 MHz,  $\text{CDCl}_3$ )  $\delta$  8.24 (dd,  $J = 4.8$  Hz, 2.0 Hz, 1H), 7.58 (dd,  $J = 7.6$  Hz, 2.0 Hz, 1H), 7.12-7.23 (m, 6H), 6.17 (dd,  $J = 7.2$  Hz, 4.8 Hz, 1H), 4.00-4.10 (m, 2H), 3.76 (d,  $J = 13.6$  Hz, 1H), 3.58 (d,  $J = 13.6$  Hz, 1H), 2.71-2.87 (m, 4H), 2.05 (s, 3H), 1.96 (s, 3H);  $^{13}\text{C}$  NMR (100 MHz,  $\text{CDCl}_3$ )  $\delta$  171.0, 169.7, 149.3, 148.9, 138.8, 136.5, 133.7, 128.8, 128.3, 127.2, 122.7, 70.6, 62.5, 59.5, 58.0, 52.7, 21.1, 21.0; HRMS (ESI-TOF) calcd for  $\text{C}_{18}\text{H}_{21}\text{N}_2\text{O}_3$   $[\text{M}-\text{AcO}]^+$  (313.1547), found 313.1556.

### 4-benzyl-6-methoxy-3,4,5,6-tetrahydro-2H-pyrido[3,2-g][1,4]oxazocine (**6**)

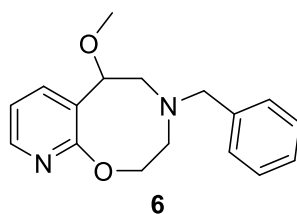

The product **6** was obtained as a light-yellow oil after silica gel chromatography ( $\text{CH}_2\text{Cl}_2/\text{MeOH} = 300:1$ ).  $^1\text{H}$  NMR (400 MHz,  $\text{CD}_3\text{OD}$ )  $\delta$  8.12 (dd,  $J = 4.8$  Hz, 2.0 Hz, 1H), 7.85 (dd,  $J = 7.6$  Hz, 2.0 Hz, 1H), 7.25 (dd,  $J = 8.0$  Hz, 4.8 Hz, 1H), 7.08-7.19 (m, 5H), 4.93 (dd,  $J = 8.4$  Hz, 4.0 Hz, 1H), 3.71 (d,  $J = 13.6$  Hz, 1H), 3.59 (d,  $J = 13.6$  Hz, 1H), 3.32-3.42 (m, 2H), 3.20 (s, 3H), 2.74-2.80 (m, 2H), 2.60-2.67 (m, 1H), 2.52 (dd,  $J = 13.2$  Hz, 8.4 Hz, 1H);  $^{13}\text{C}$  NMR (100 MHz,  $\text{CD}_3\text{OD}$ )  $\delta$  149.7, 149.1, 140.4, 139.2, 138.7, 130.1, 129.3, 128.1, 124.4, 72.1, 69.2, 61.5, 60.8, 58.9, 55.0; HRMS (ESI-TOF) calcd for  $\text{C}_{17}\text{H}_{21}\text{N}_2\text{O}_2$   $[\text{M}+\text{H}]^+$  (285.1603), found 285.1606.

### 3-(4-benzylmorpholin-2-yl)pyridin-2-ol (**7**)



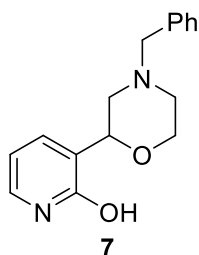

The product **7** was obtained as a light-yellow oil after silica gel chromatography (CH<sub>2</sub>Cl<sub>2</sub>/MeOH = 300:1). <sup>1</sup>H NMR (400 MHz, CD<sub>3</sub>OD) δ 8.16 (dd, *J* = 4.8 Hz, 2.0 Hz, 1H), 7.86 (dd, *J* = 8.0 Hz, 2.0 Hz, 1H), 7.28 (dd, *J* = 8.0 Hz, 4.8 Hz, 1H), 7.12-7.24 (m, 5H), 4.74 (dd, *J* = 10.0 Hz, 2.0 Hz, 1H), 3.91 (ddd, *J* = 11.6 Hz, 3.6 Hz, 1.2 Hz, 1H), 3.71 (td, *J* = 11.6 Hz, 2.4 Hz, 1H), 3.45 (s, 2H), 3.00 (dt, *J* = 11.6 Hz, 2.0 Hz, 1H), 2.65-2.68 (m, 1H), 2.18 (td, *J* = 11.6 Hz, 3.6 Hz, 1H), 1.76 (dd, *J* = 11.6 Hz, 10.0 Hz, 1H); <sup>13</sup>C NMR (100 MHz, CD<sub>3</sub>OD) δ 149.6, 149.4, 138.7, 138.1, 136.4, 130.5, 129.4, 128.5, 124.5, 75.4, 68.0, 63.9, 59.1, 53.7; HRMS (ESI-TOF) calcd for C<sub>16</sub>H<sub>19</sub>N<sub>2</sub>O<sub>2</sub> [M+H]<sup>+</sup> (271.1447), found 271.1448.

**4-methyl-9-(piperidin-1-yl)-3,4,5,6-tetrahydro-2H-pyrido[3,4-g][1,4]oxazocin-6-ol (8)**

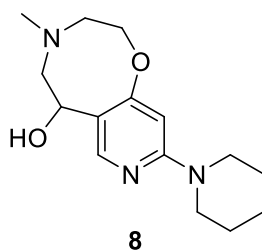

The product **8** was obtained as a light-yellow oil after silica gel chromatography (CH<sub>2</sub>Cl<sub>2</sub>/MeOH = 300:1). <sup>1</sup>H NMR (400 MHz, CDCl<sub>3</sub>) δ 7.99 (s, 1H), 6.30 (s, 1H), 4.62 (dd, *J* = 6.4 Hz, 1.2 Hz, 1H), 4.21 (dt, *J* = 11.6 Hz, 6.8 Hz, 1H), 3.99 (dt, *J* = 11.6 Hz, 2.8 Hz, 1H), 3.49 (t, *J* = 4.8 Hz, 4H), 3.07 (dd, *J* = 12.8 Hz, 6.4 Hz, 1H), 2.80 (dd, *J* = 12.8 Hz, 1.6 Hz, 1H), 2.60 (dd, *J* = 6.8 Hz, 2.8 Hz, 2H), 2.56 (s, 3H), 1.78-2.16 (m, 6H); <sup>13</sup>C NMR (100 MHz, CDCl<sub>3</sub>) δ 164.8, 161.6, 148.3, 122.3, 100.3, 74.7, 69.5, 64.9, 55.6, 47.3, 46.5, 25.6, 24.8; HRMS (ESI-TOF) calcd for C<sub>15</sub>H<sub>24</sub>N<sub>3</sub>O<sub>2</sub> [M+H]<sup>+</sup> (278.1869), found 278.1866.

#### 4. References

- [1] Bradley, P. A.; Carroll, R. J.; Lecouturier, Y. C.; Moore, R.; Noeureuil, P.; Patel, B.; Snow, J.; Wheeler, S. *Org. Process Res. Dev.* **2010**, *14*, 1326.
- [2] Perrone, M. G.; Santandrea, E.; Giorgio, E.; Bleve, L.; Scilimati, A.; Tortorella, P. *Bioorg. Med. Chem.* **2006**, *14*, 1207.
- [3] G ärtner, D.; Stein, A. L.; Grupe, S.; Arp, J.; von Wangelin, A. J. *Angew. Chem. Int. Ed.* **2015**, *54*, 10545.
- [4] Sano, T.; Toda, J.; Maehara, N. *Can. J. Chem.* **1987**, *65*, 94.
- [5] Mishra, J. K.; Samanta, K.; Jain, M.; Dikshit, M.; Panda, G. *Bioorg. Med. Chem. Lett.* **2010**, *20*, 244.

## 5. Copies of NMR Spectra

### 2,4-dichloro-5-(oxiran-2-yl)pyridine (1a)

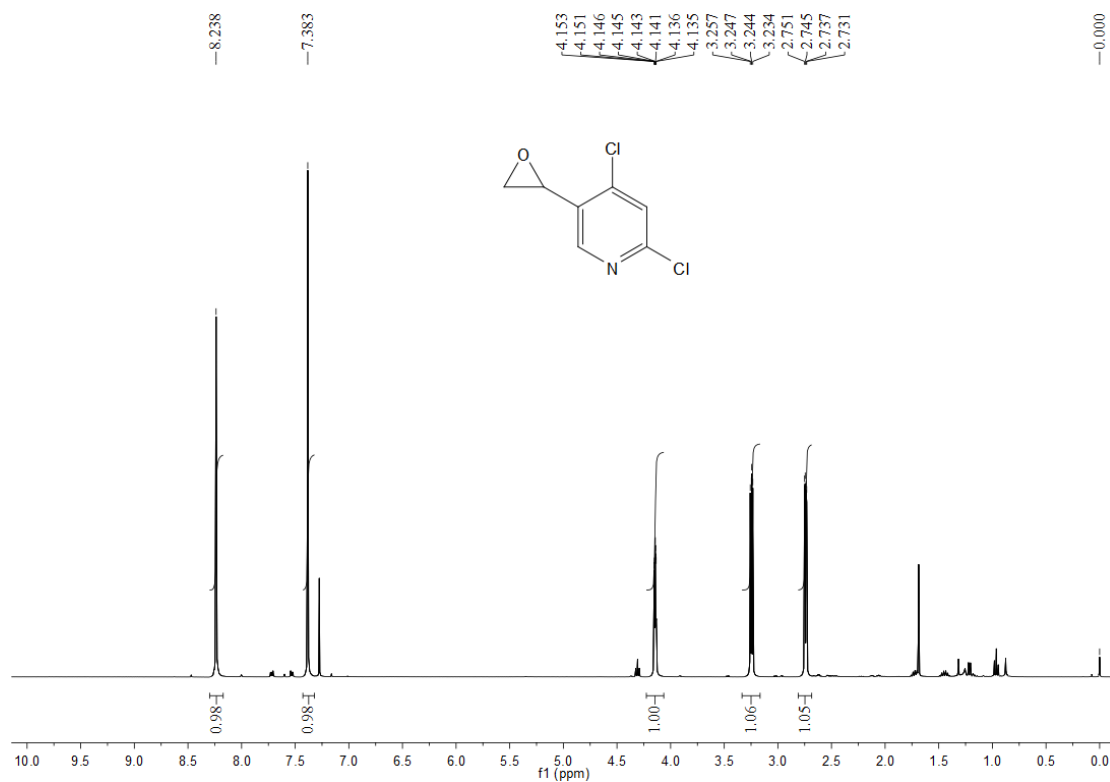

<sup>1</sup>H NMR (400 MHz, CDCl<sub>3</sub>) of **1a**

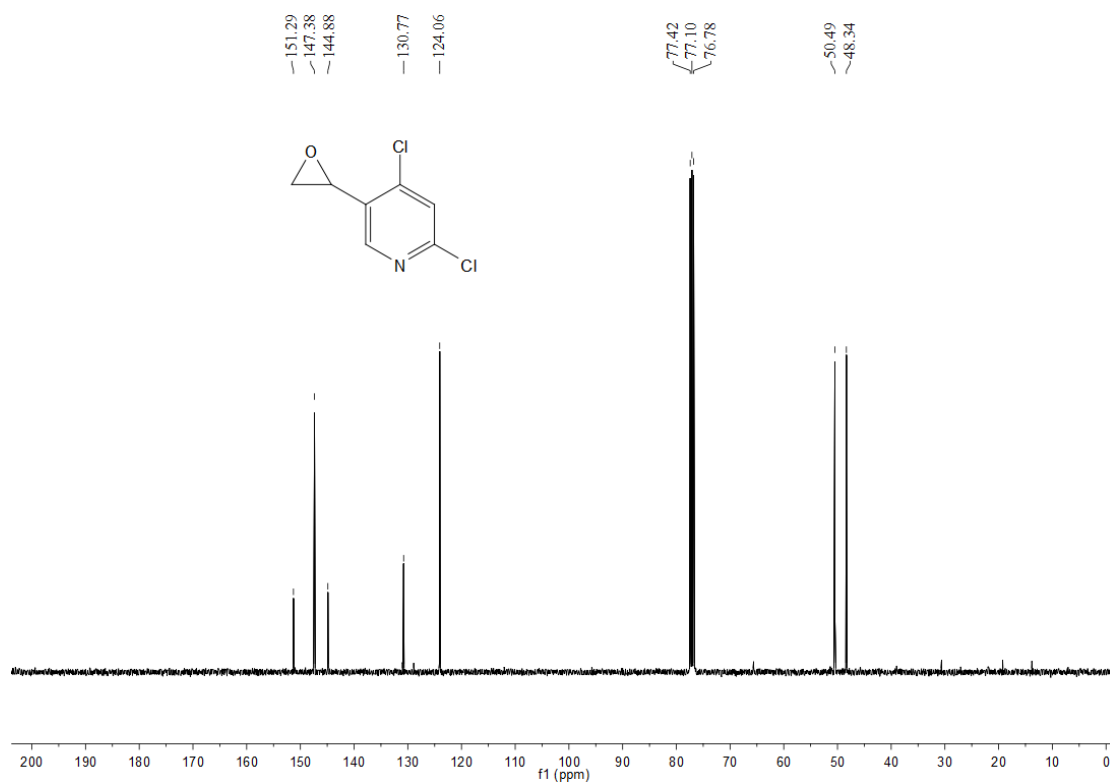

<sup>13</sup>C NMR (100 MHz, CDCl<sub>3</sub>) of **1a**

### 4-chloro-3-(oxiran-2-yl)pyridine (**1b**)

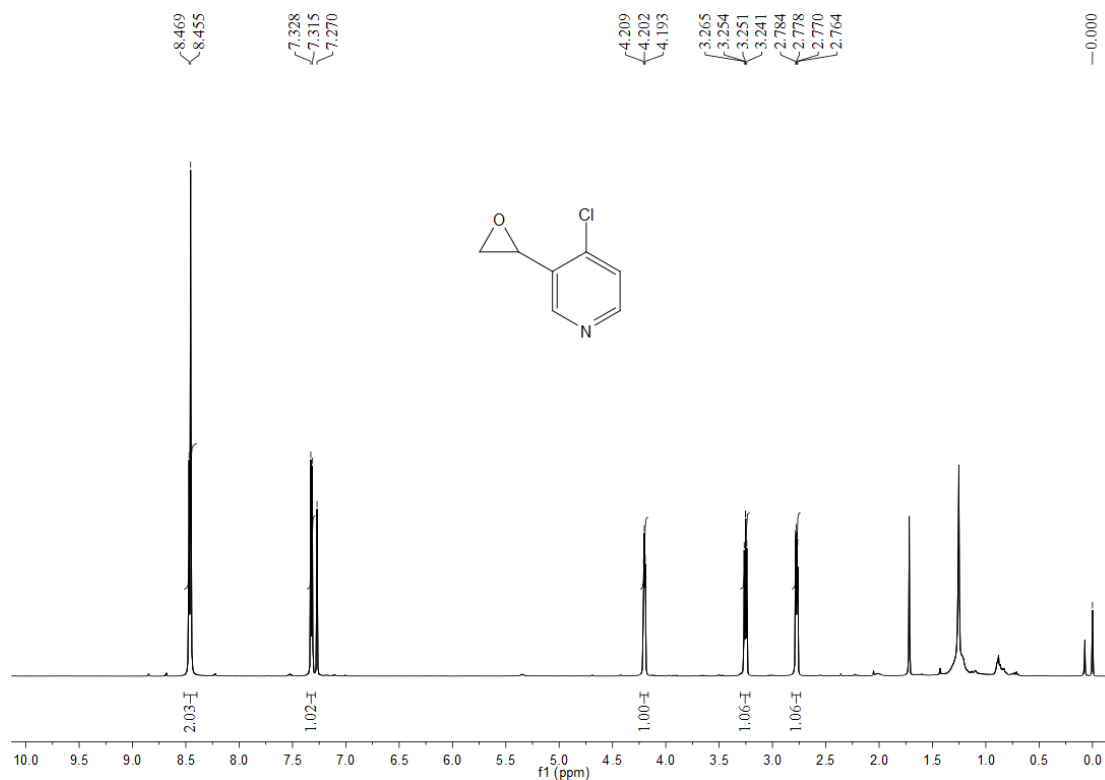

<sup>1</sup>H NMR (400 MHz, CDCl<sub>3</sub>) of **1b**

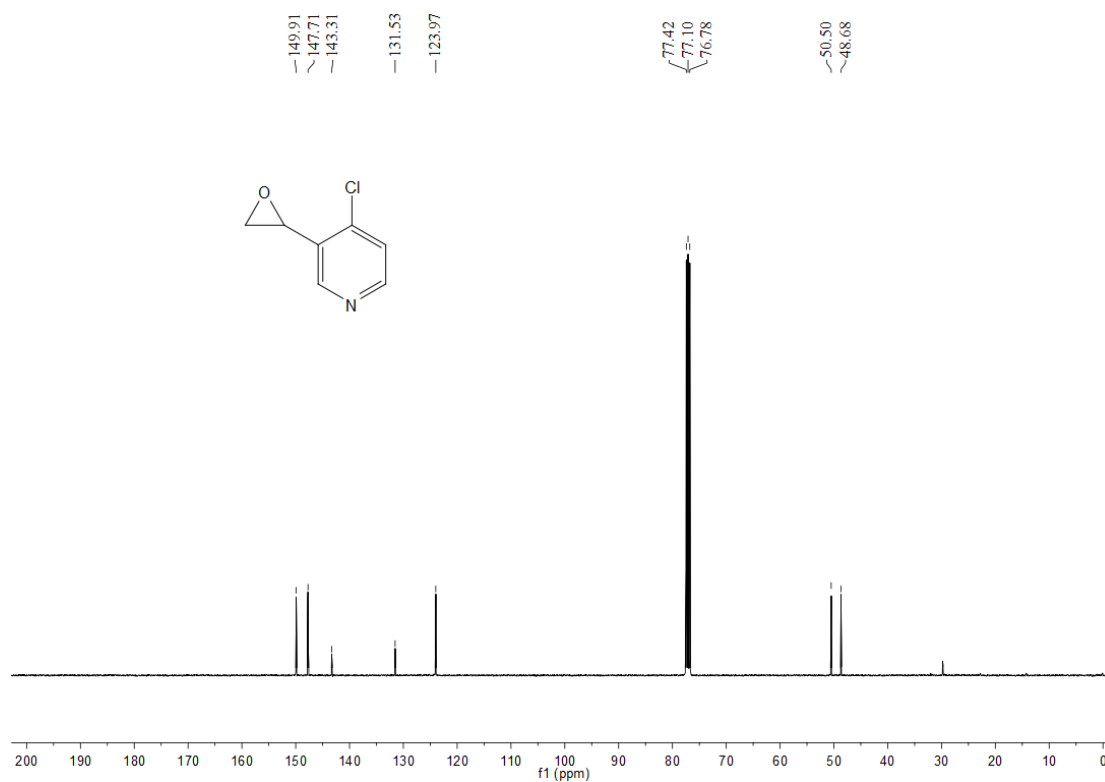

<sup>13</sup>C NMR (100 MHz, CDCl<sub>3</sub>) of **1b**

### 4-chloro-2-methyl-5-(oxiran-2-yl)pyridine (1c)

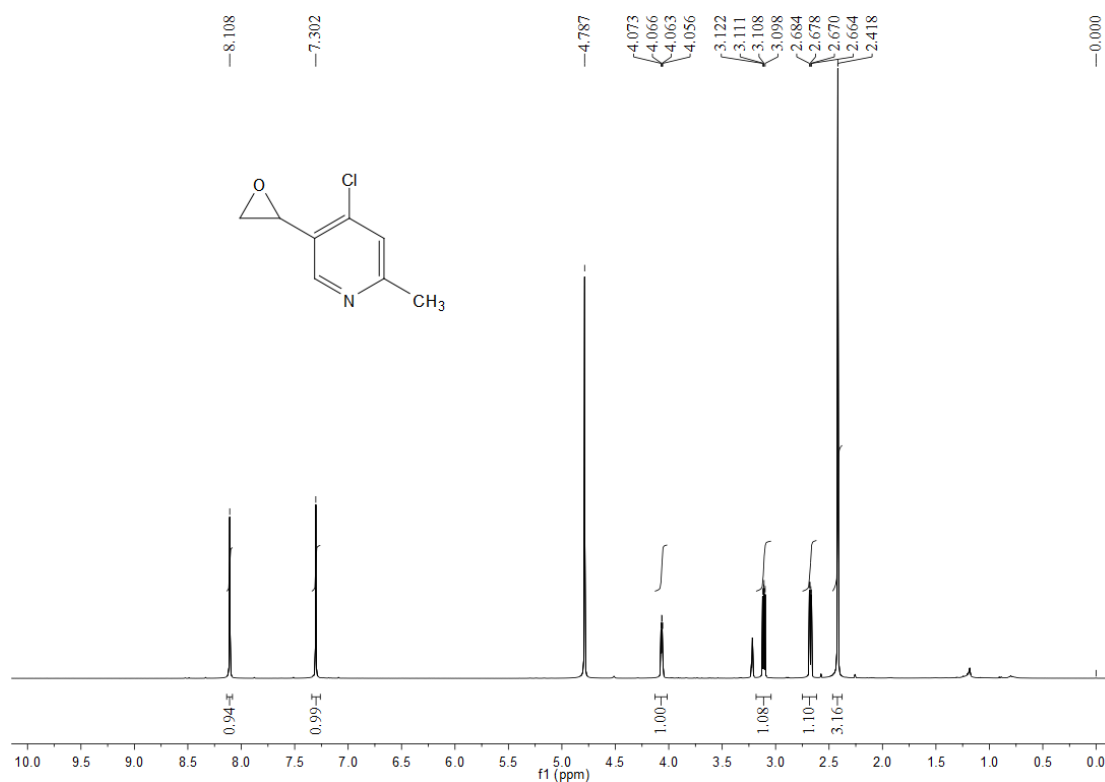

<sup>1</sup>H NMR (400 MHz, CD<sub>3</sub>OD) of **1c**

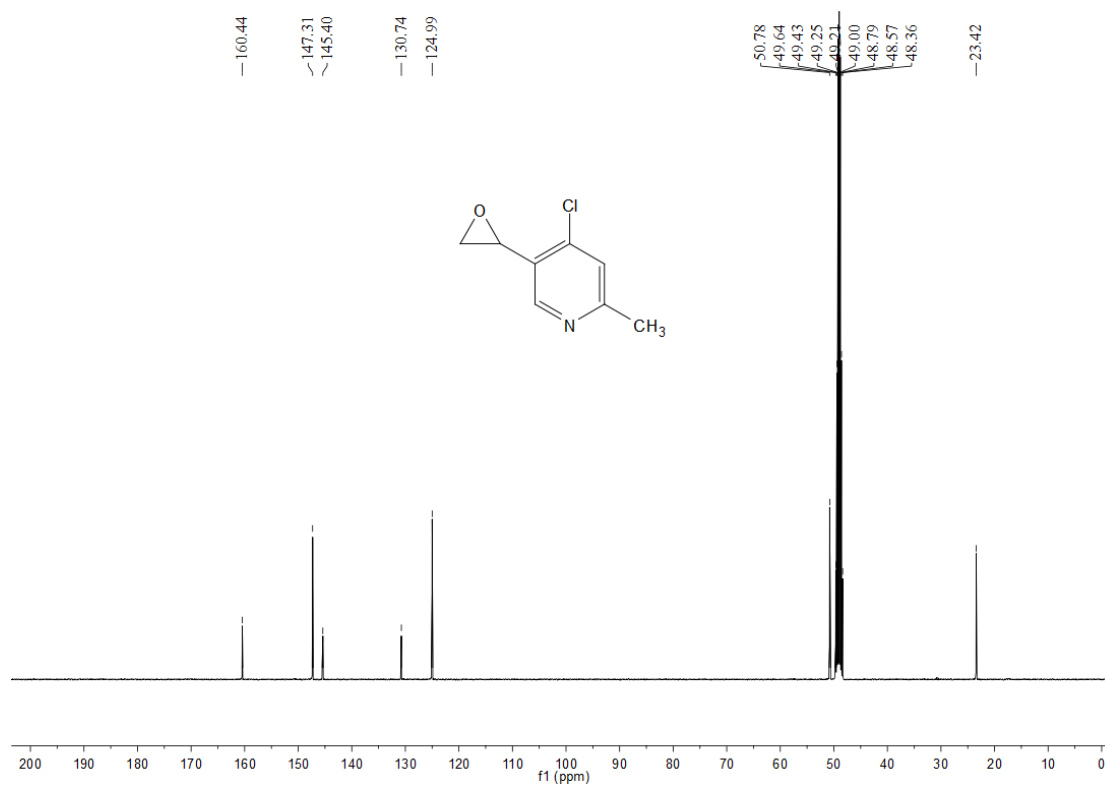

<sup>13</sup>C NMR (100 MHz, CD<sub>3</sub>OD) of **1c**

### 4-chloro-2-fluoro-5-(oxiran-2-yl)pyridine (**1d**)

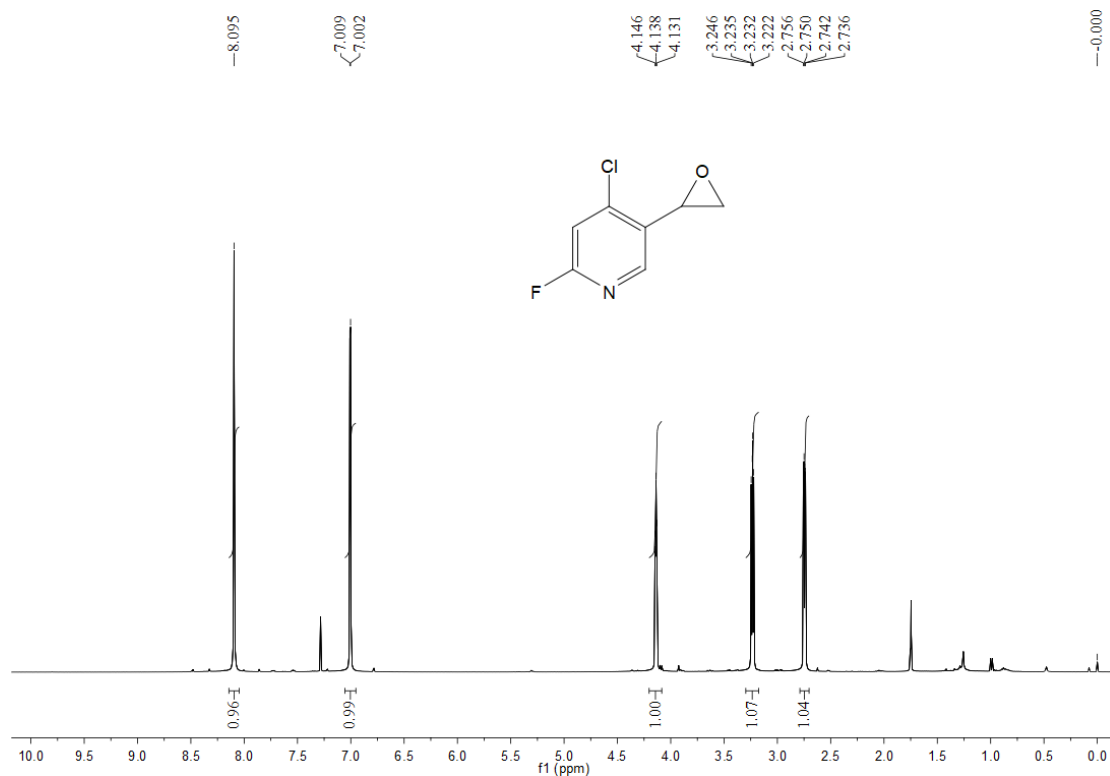

<sup>1</sup>H NMR (400 MHz, CDCl<sub>3</sub>) of **1d**

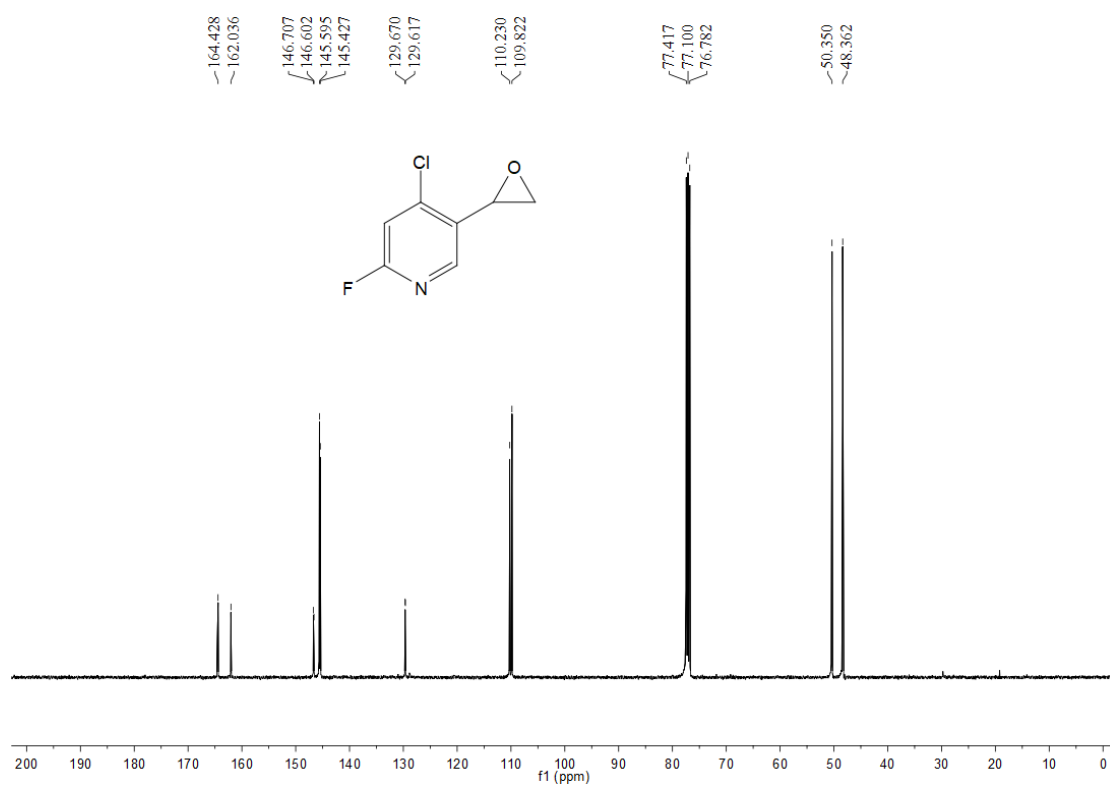

<sup>13</sup>C NMR (100 MHz, CDCl<sub>3</sub>) of **1d**

## 2-chloro-3-(oxiran-2-yl)pyridine (1e)

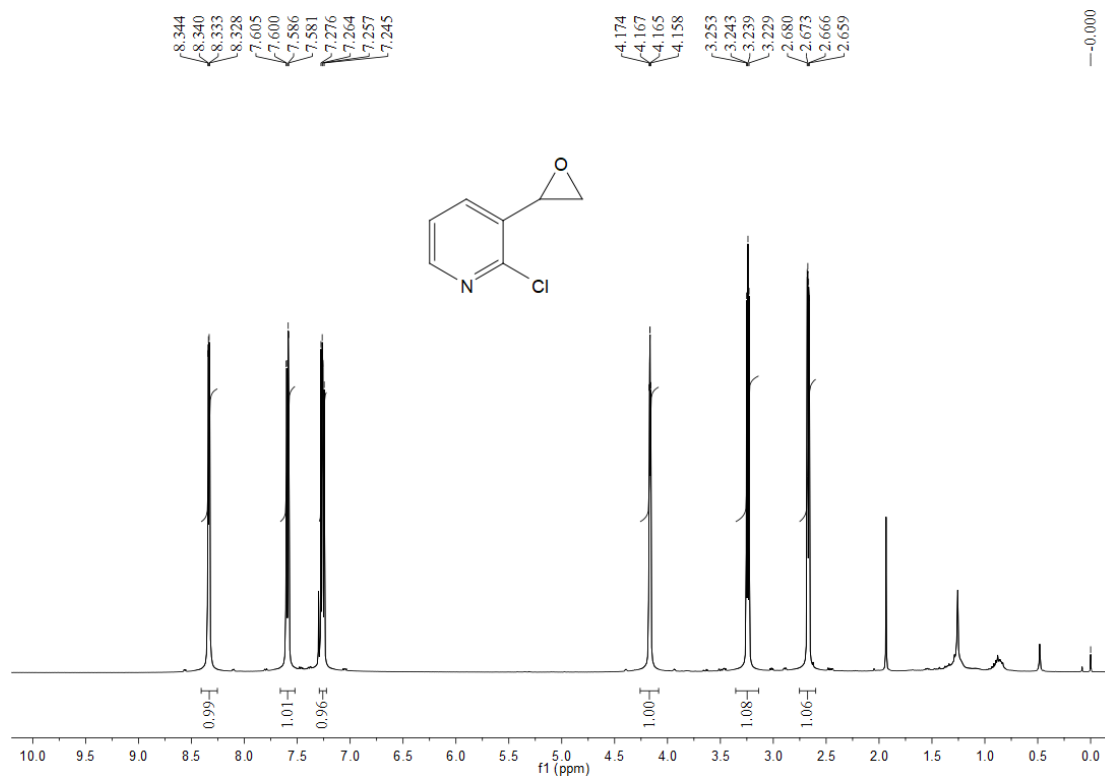

<sup>1</sup>H NMR (400 MHz, CDCl<sub>3</sub>) of **1e**

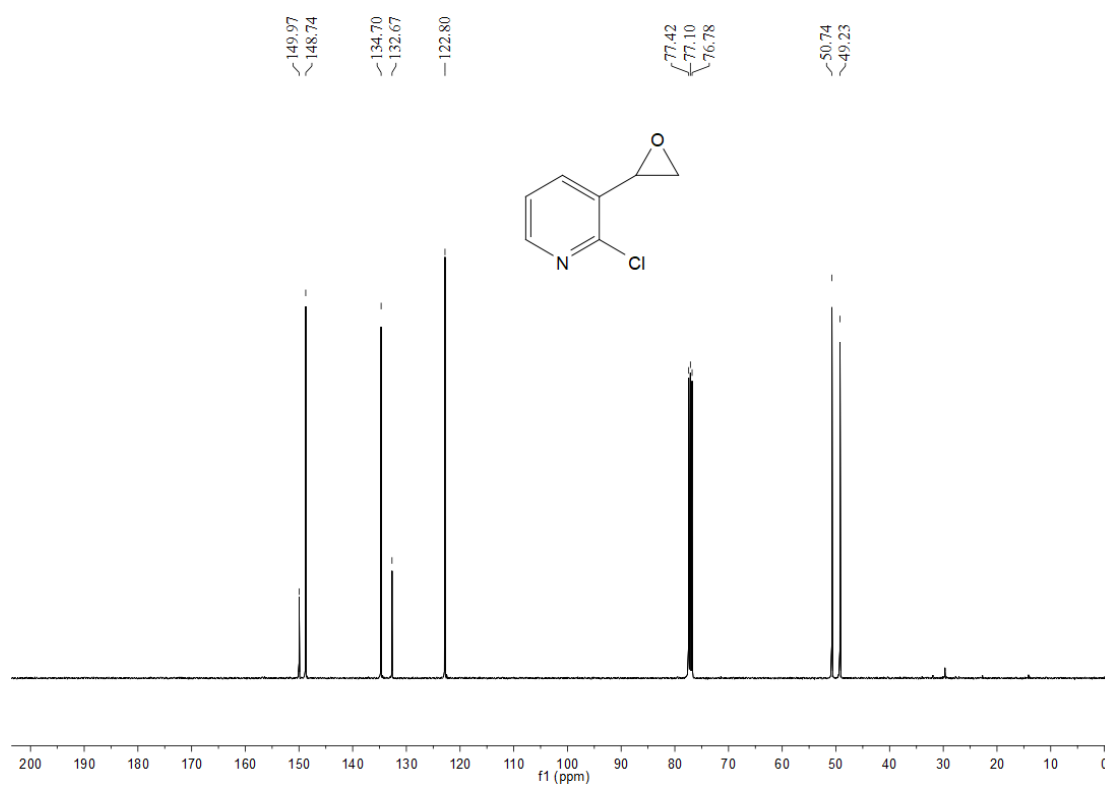

<sup>13</sup>C NMR (100 MHz, CDCl<sub>3</sub>) of **1e**

### 9-chloro-3,4,5,6-tetrahydro-2H-pyrido[3,4-g][1,4]oxazocin-6-ol (3aa)

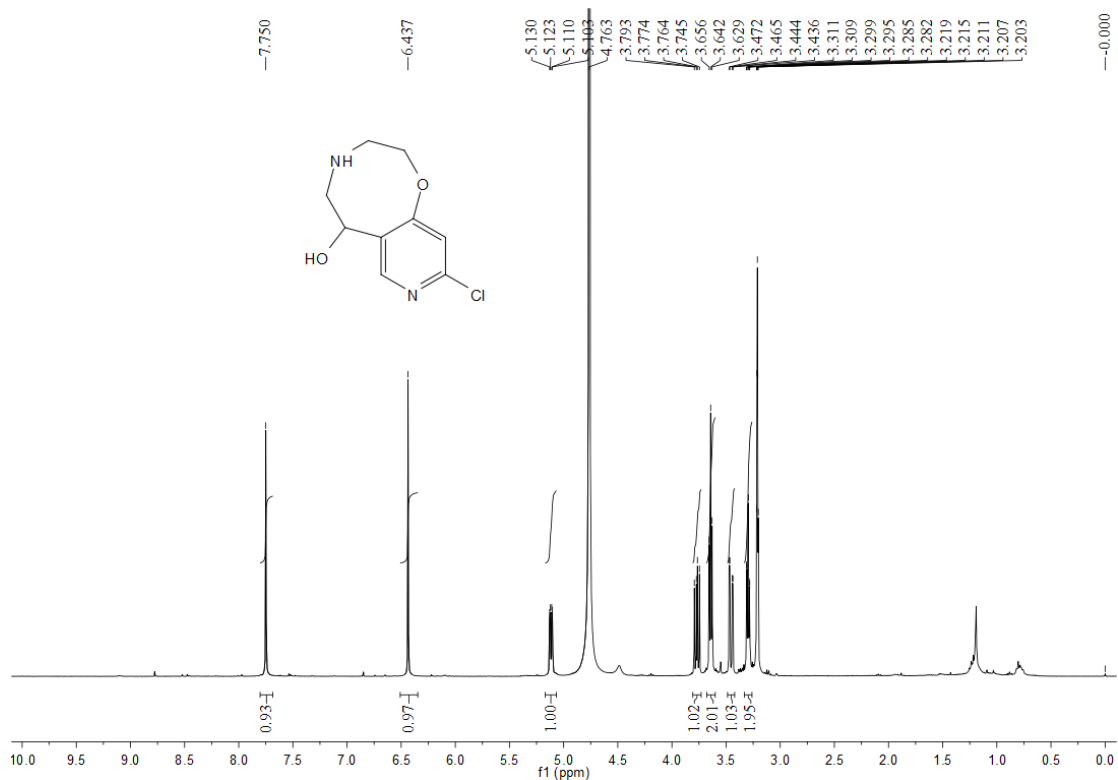

<sup>1</sup>H NMR (400 MHz, CD<sub>3</sub>OD) of 3aa

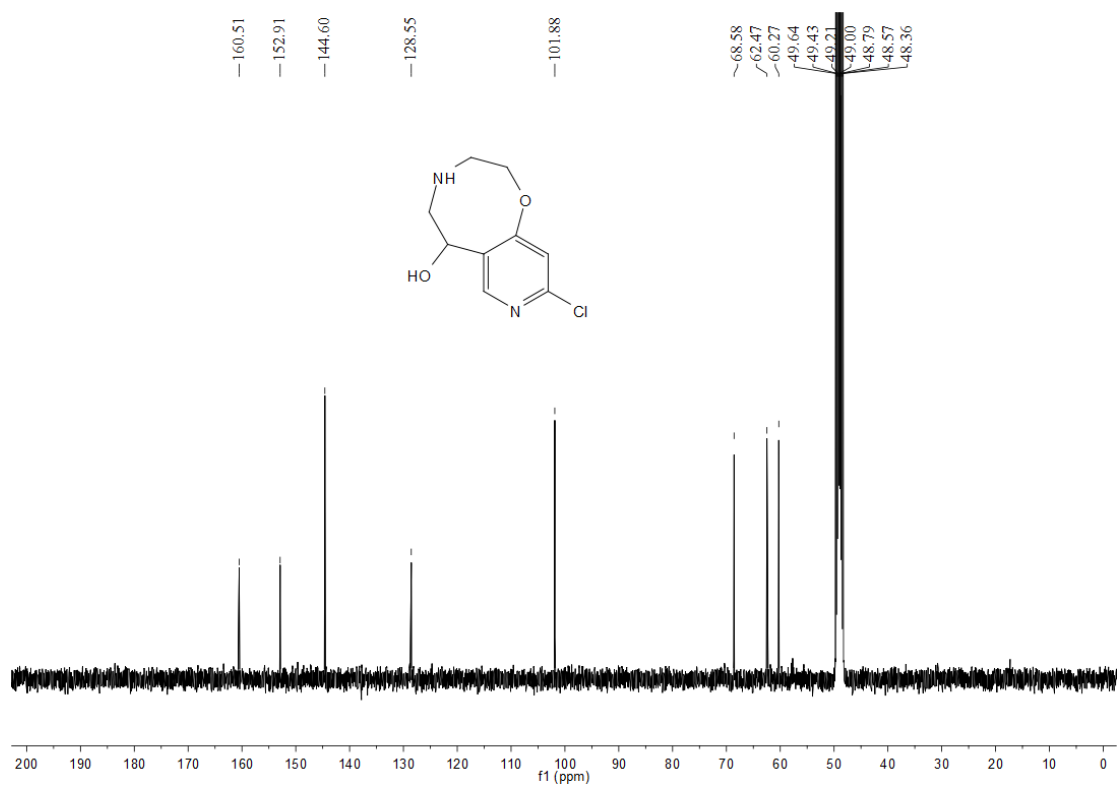

<sup>13</sup>C NMR (100 MHz, CD<sub>3</sub>OD) of 3aa



**9-chloro-3,4,5,6-tetrahydro-2H-pyrido[3,4-g][1,4]oxazocin-6-ol (3aa)**

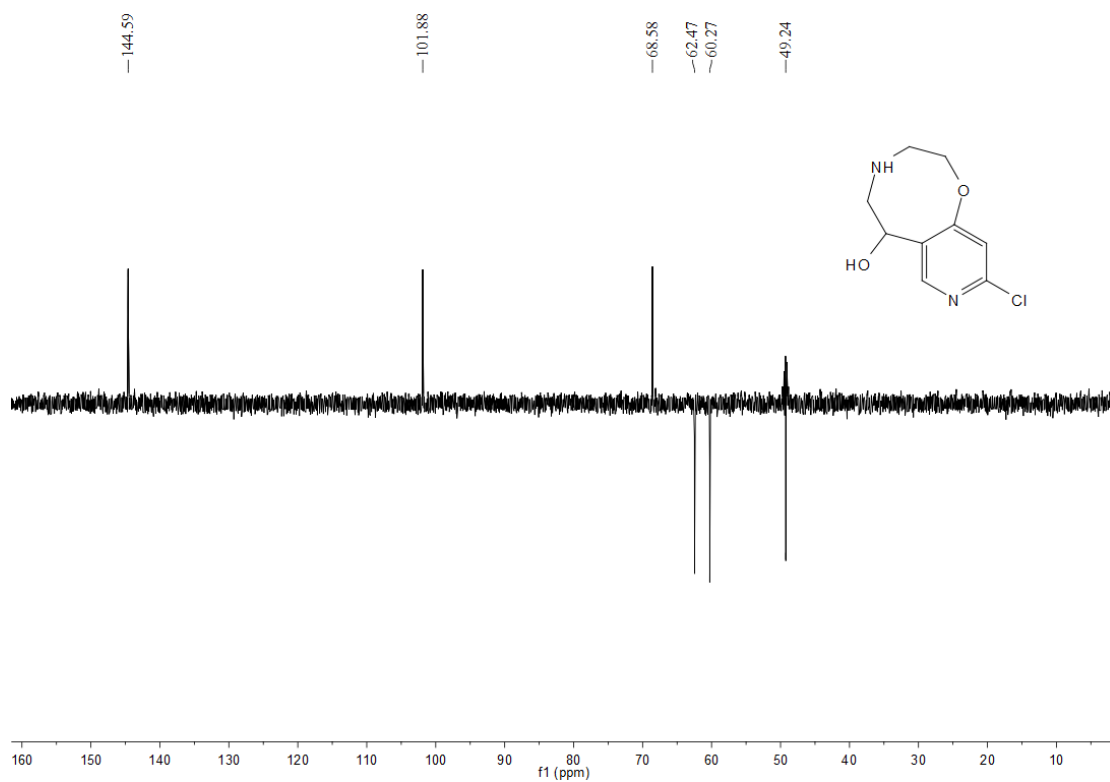

DEPT135 of **3aa**

### 9-chloro-3-methyl-3,4,5,6-tetrahydro-2H-pyrido[3,4-g][1,4]oxazocin-6-ol (3ab)

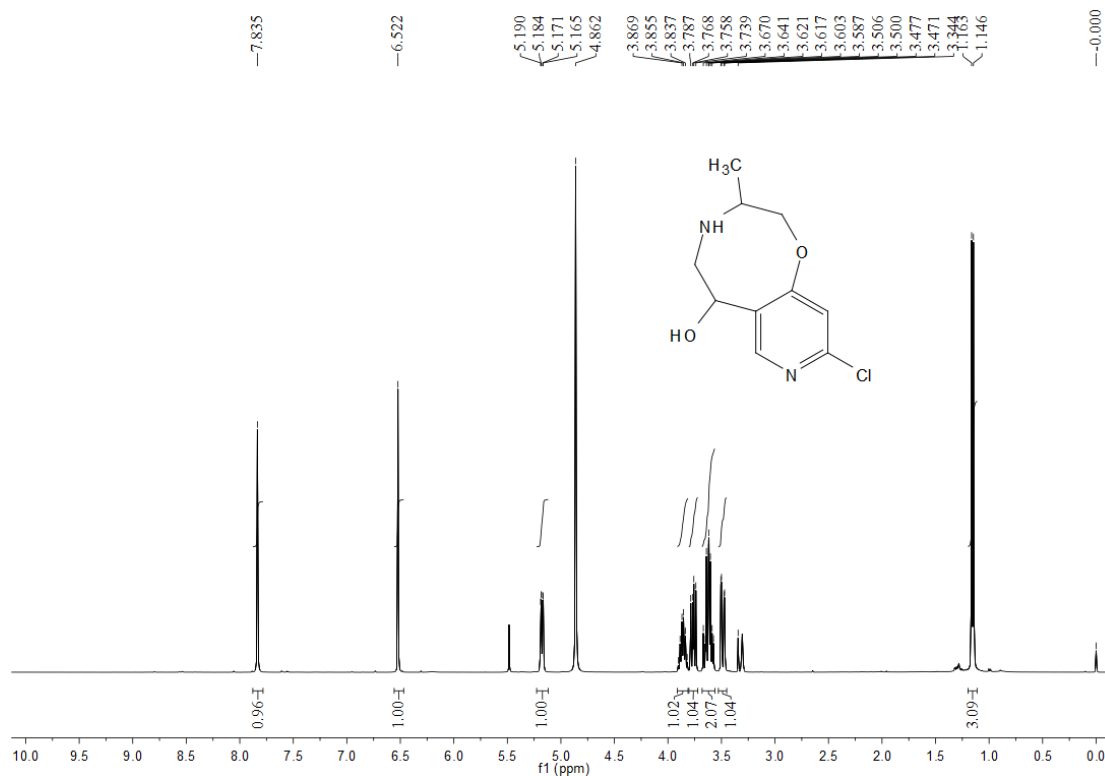

<sup>1</sup>H NMR (400 MHz, CD<sub>3</sub>OD) of **3ab**

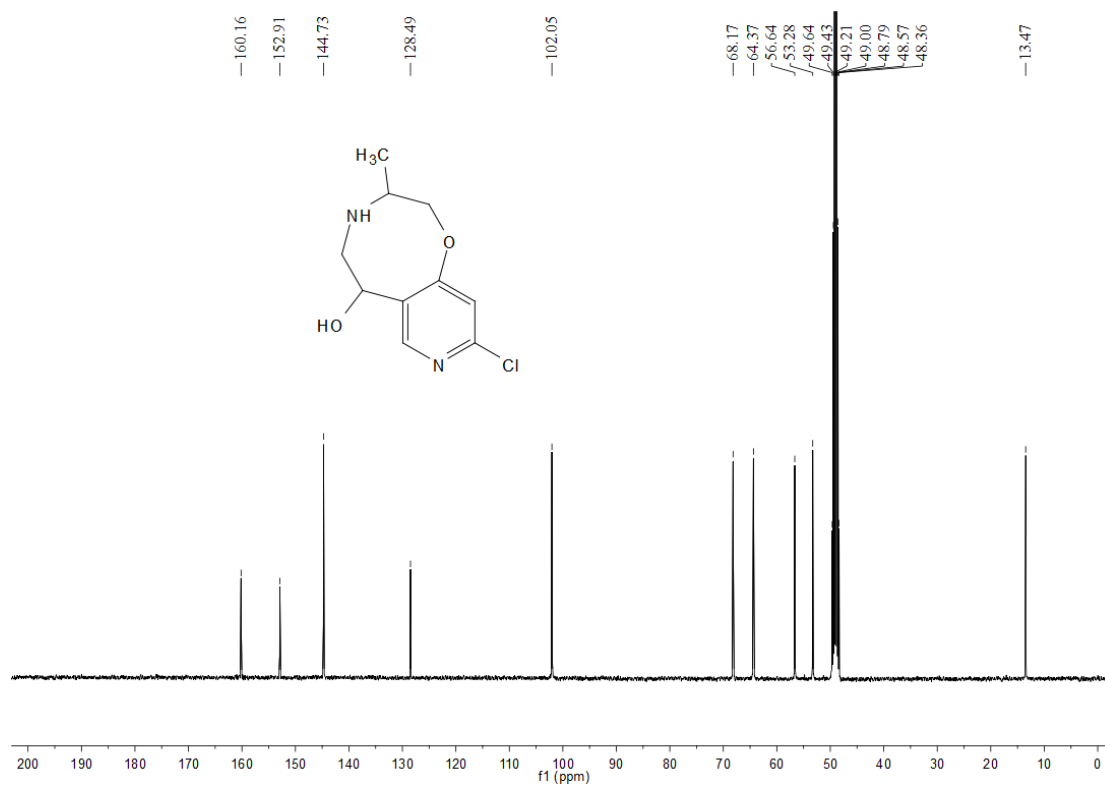

<sup>13</sup>C NMR (100 MHz, CD<sub>3</sub>OD) of **3ab**

**9-chloro-3-methyl-3,4,5,6-tetrahydro-2H-pyrido[3,4-g][1,4]oxazocin-6-ol (3ab)**

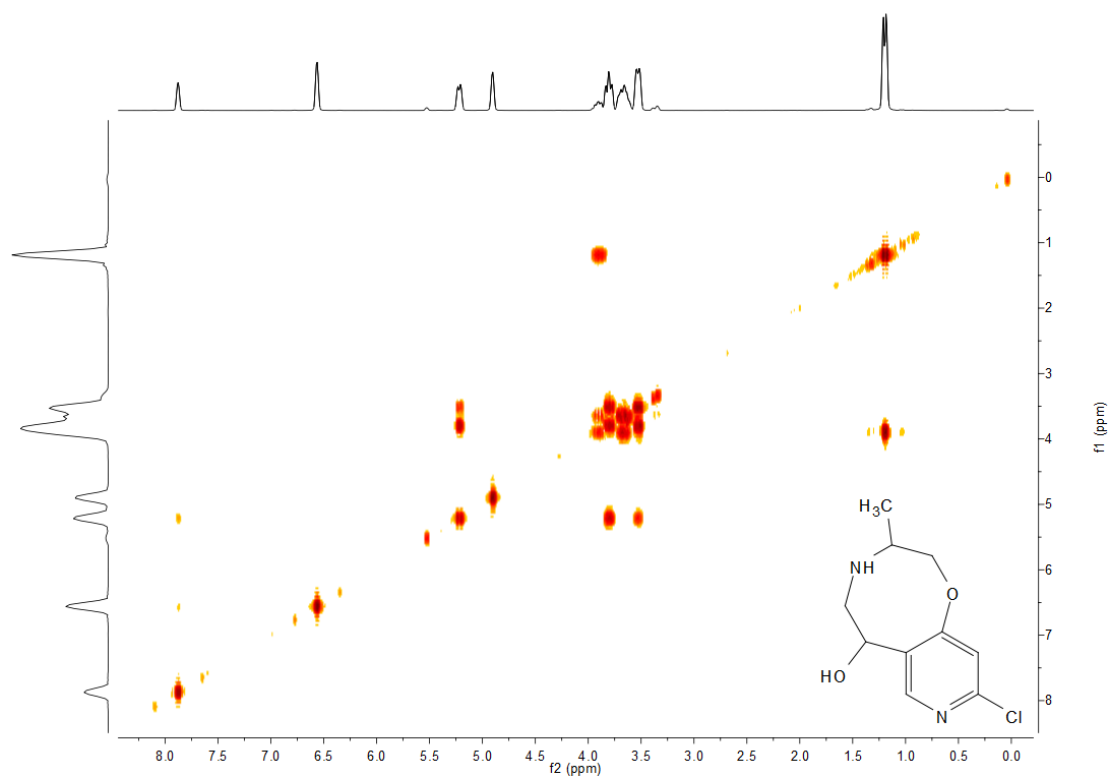

**$^1\text{H}$ - $^1\text{H}$  COSY of **3ab****

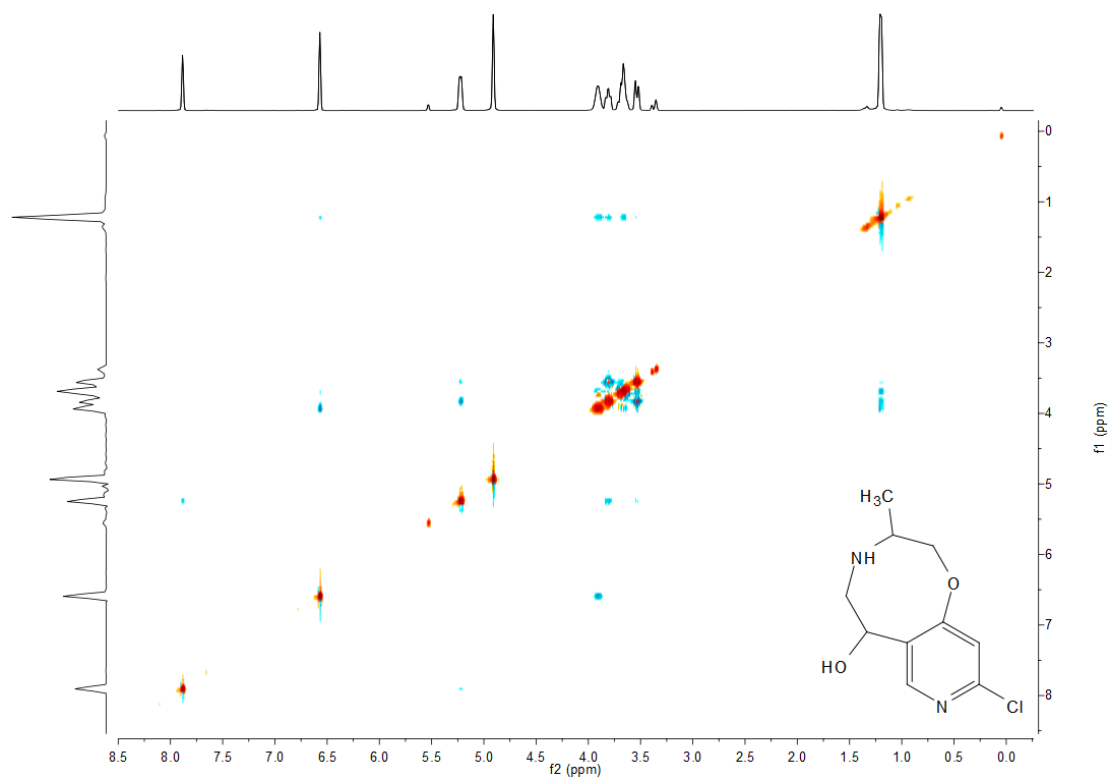

**NOESY of **3ab****

**9-chloro-3-methyl-3,4,5,6-tetrahydro-2H-pyrido[3,4-g][1,4]oxazocin-6-ol (3ab)**

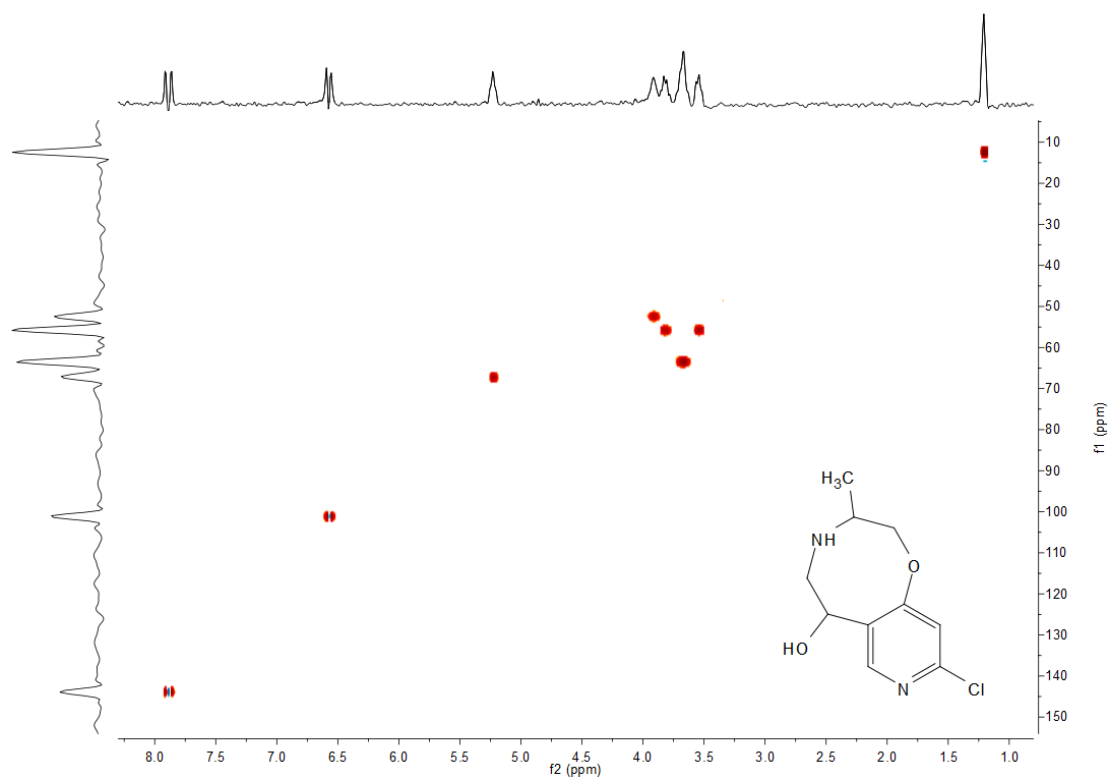

**9-chloro-3-isobutyl-3,4,5,6-tetrahydro-2H-pyrido[3,4-g][1,4]oxazocin-6-ol (3ac)**

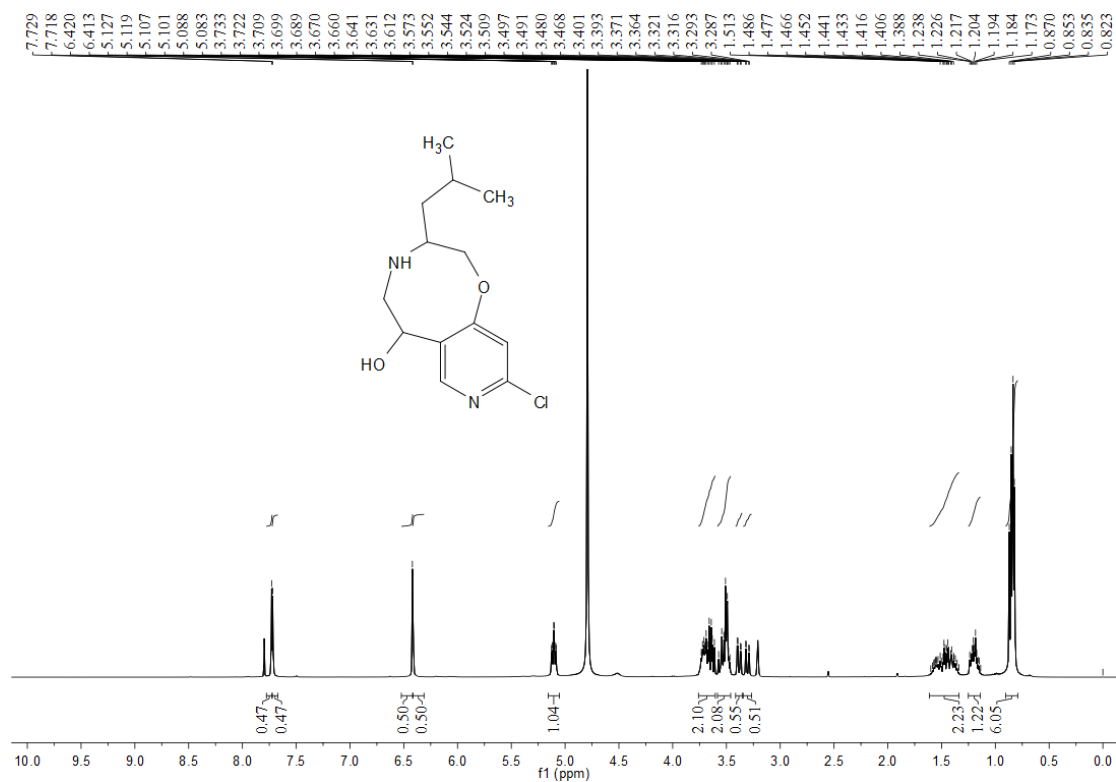

<sup>1</sup>H NMR (400 MHz, CD<sub>3</sub>OD) of 3ac

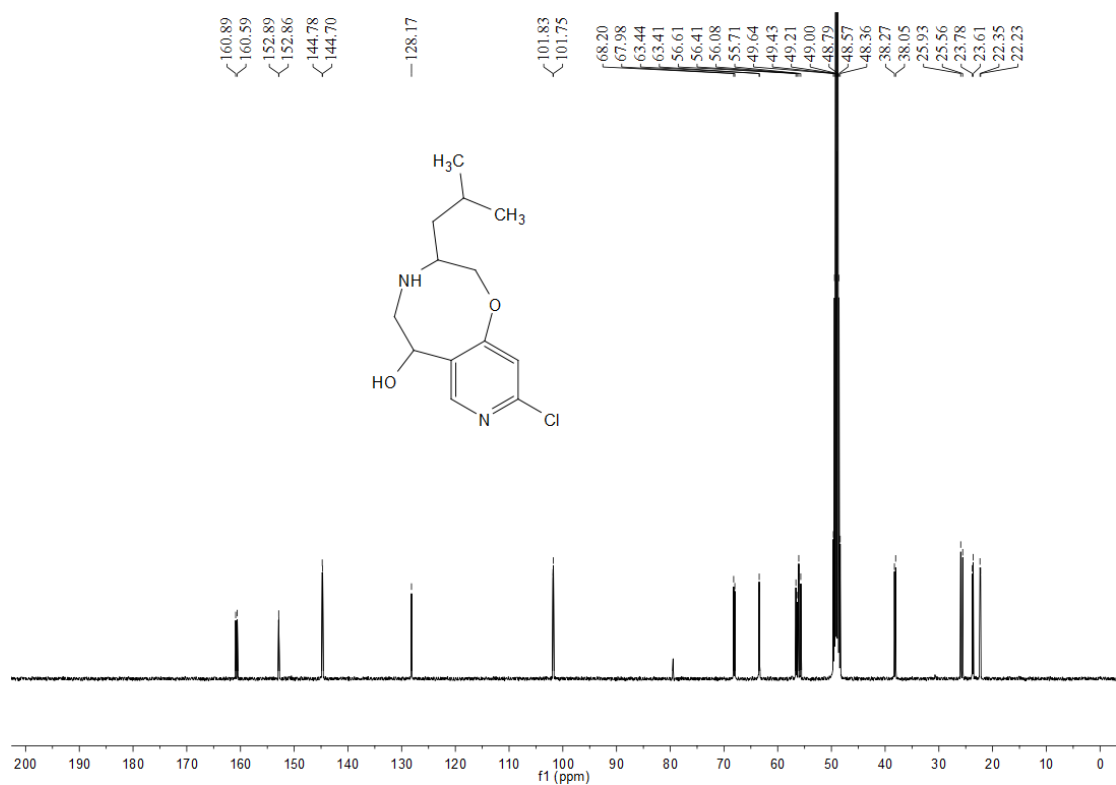

<sup>13</sup>C NMR (100 MHz, CD<sub>3</sub>OD) of 3ac

**9-chloro-3,3-dimethyl-3,4,5,6-tetrahydro-2H-pyrido[3,4-g][1,4]oxazocin-6-ol**

**(3ad)**

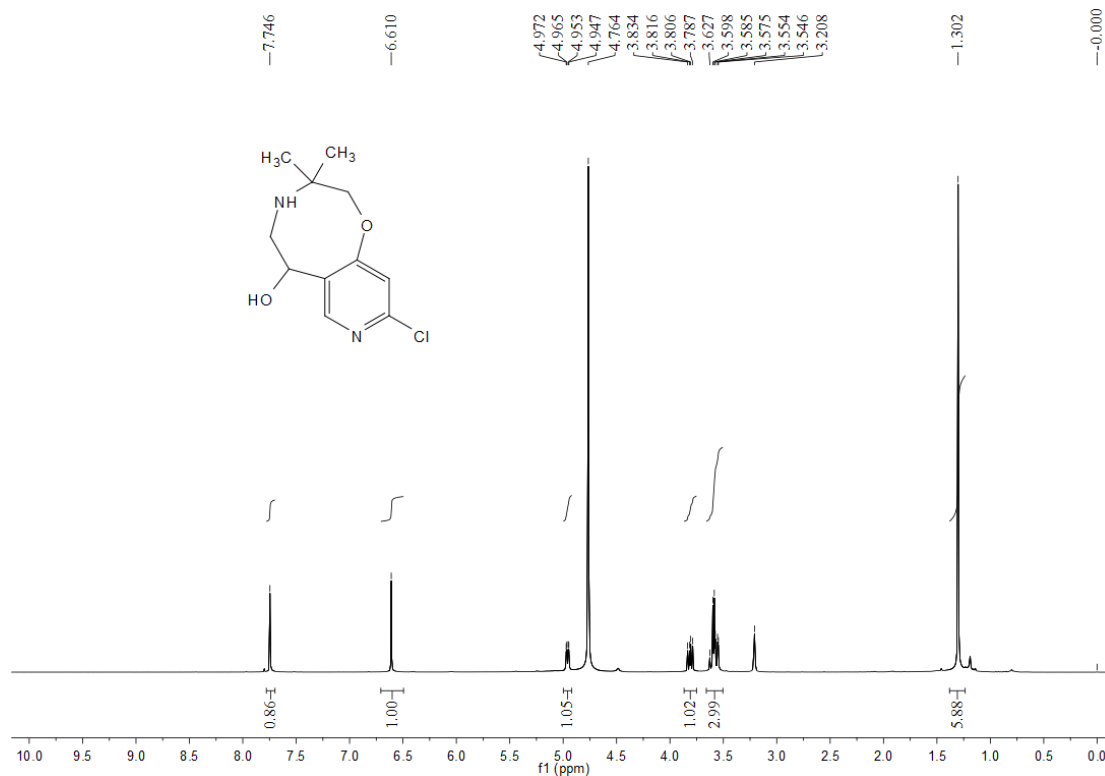

<sup>1</sup>H NMR (400 MHz, CD<sub>3</sub>OD) of **3ad**

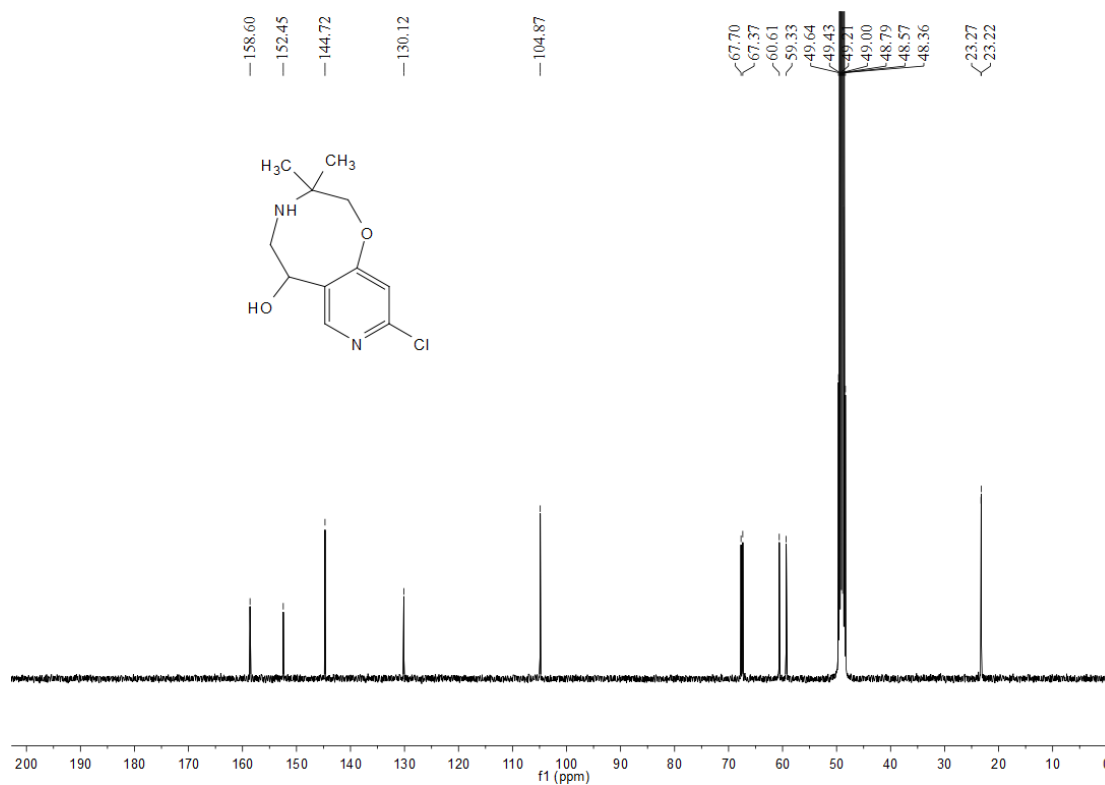

<sup>13</sup>C NMR (100 MHz, CD<sub>3</sub>OD) of **3ad**

### 9-chloro-2-methyl-3,4,5,6-tetrahydro-2H-pyrido[3,4-g][1,4]oxazocin-6-ol (3ae)

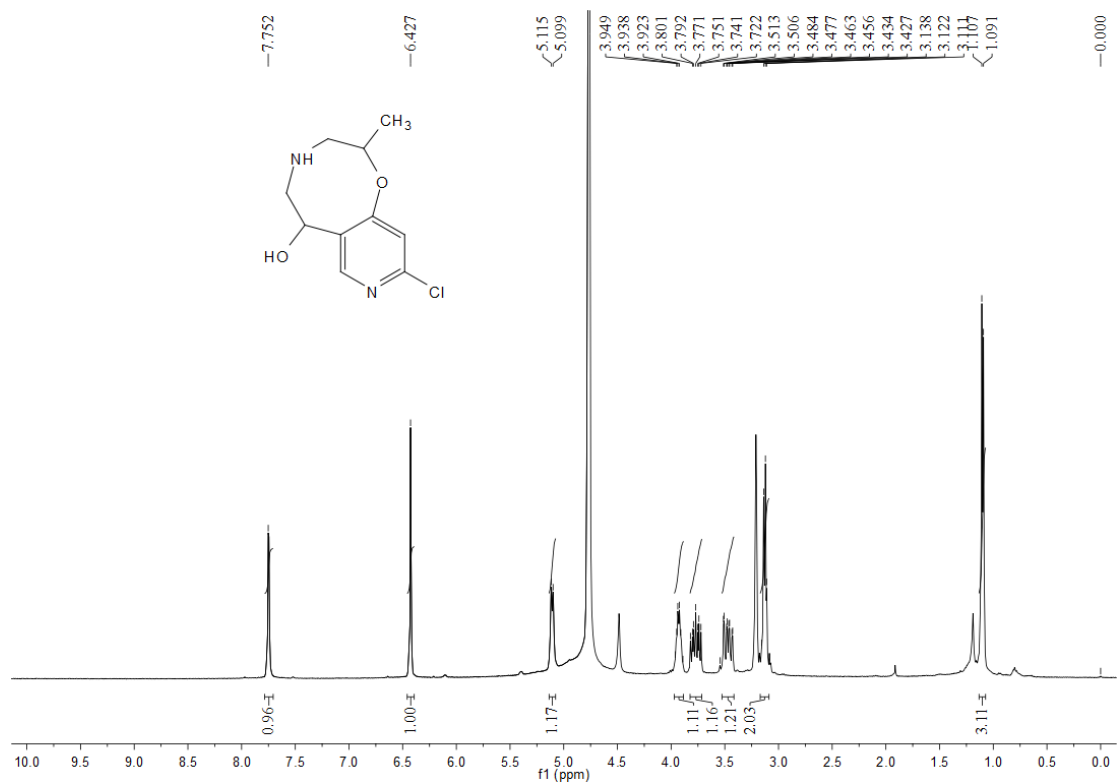

<sup>1</sup>H NMR (400 MHz, CD<sub>3</sub>OD) of 3ae

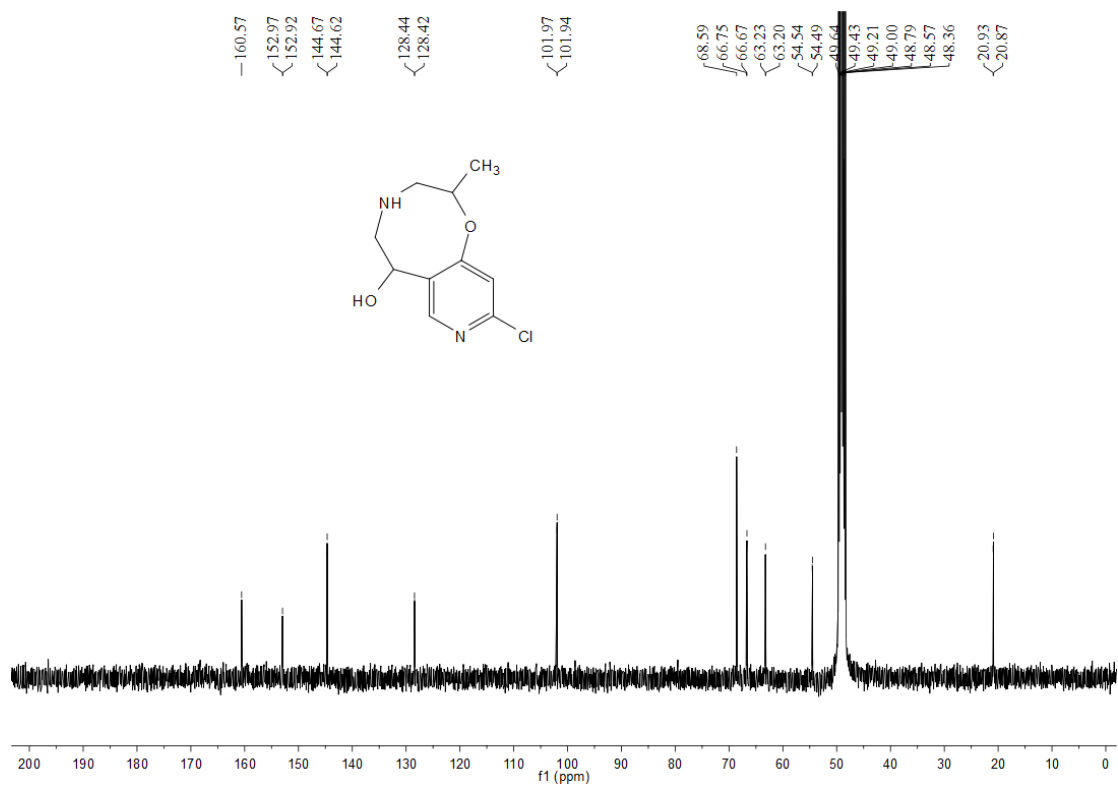

<sup>13</sup>C NMR (100 MHz, CD<sub>3</sub>OD) of 3ae

**9-chloro-2,2-dimethyl-3,4,5,6-tetrahydro-2H-pyrido[3,4-g][1,4]oxazocin-6-ol (3af)**

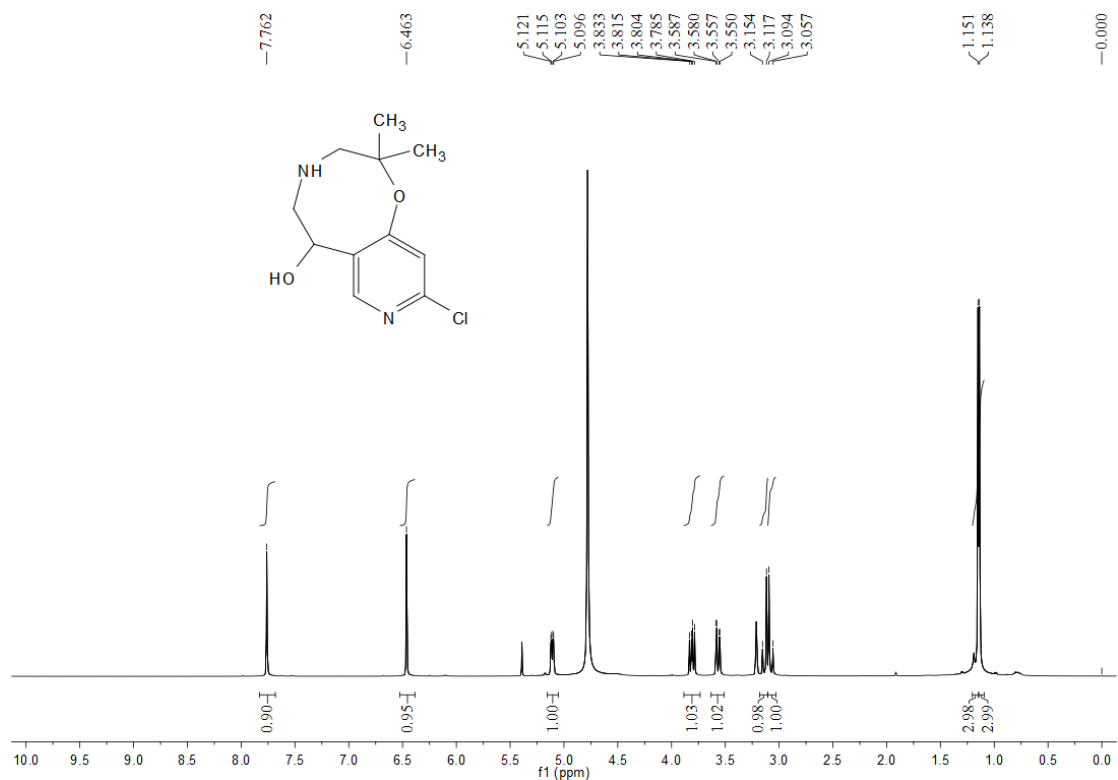

<sup>1</sup>H NMR (400 MHz, CD<sub>3</sub>OD) of **3af**

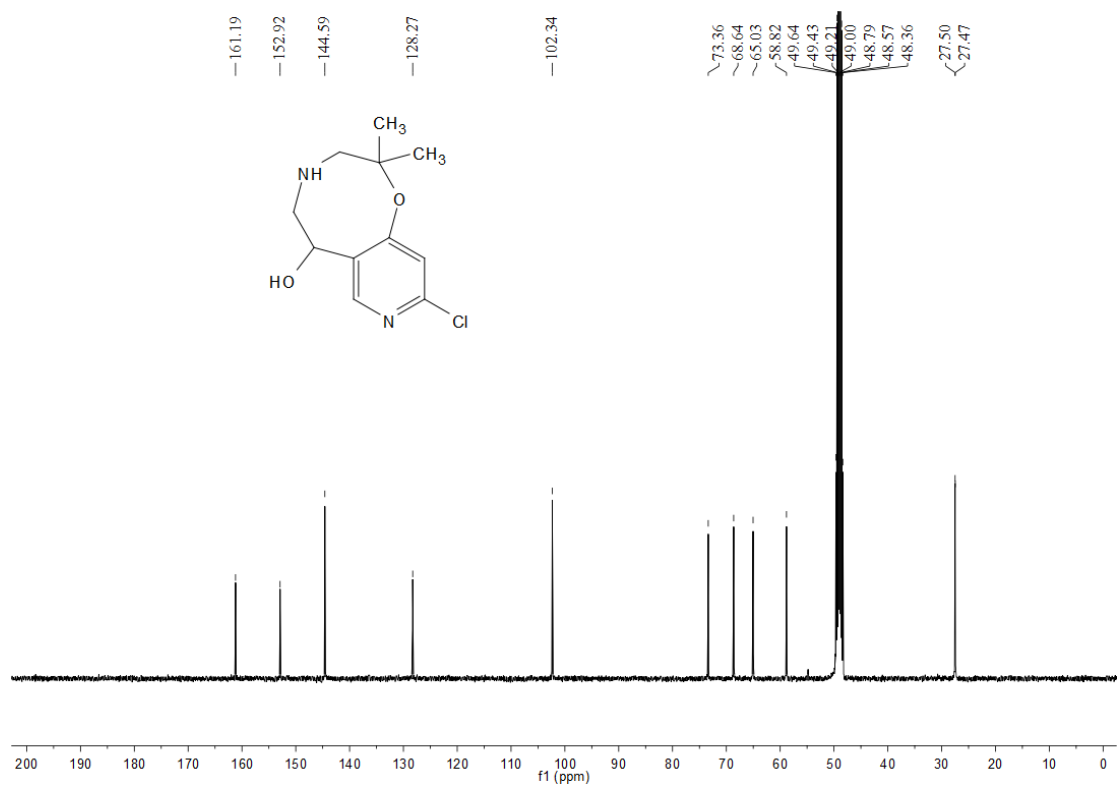

<sup>13</sup>C NMR (100 MHz, CD<sub>3</sub>OD) of **3af**



**2-chloro-5,6,7,7a,8,9,10,10a-octahydrocyclopenta[*b*]pyrido[3,4-*g*][1,4]oxazocin-5-ol (3ag)**

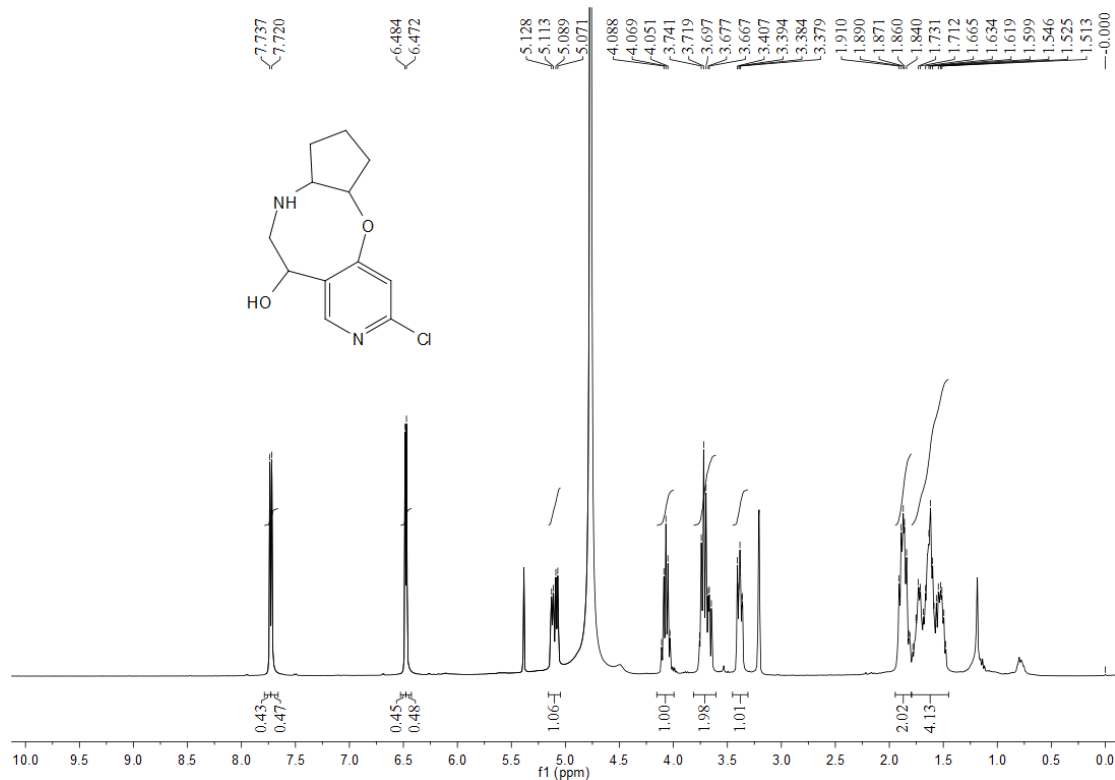

<sup>1</sup>H NMR (400 MHz, CD<sub>3</sub>OD) of **3ag**

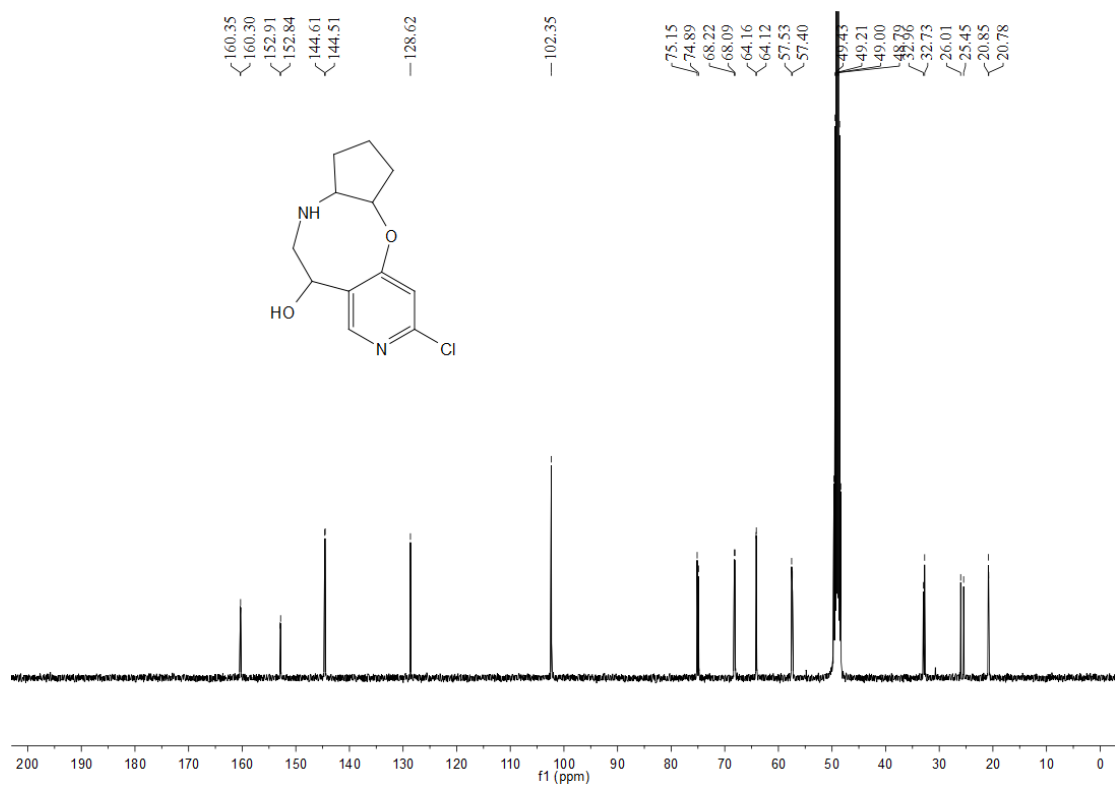

<sup>13</sup>C NMR (100 MHz, CD<sub>3</sub>OD) of **3ag**

**2-chloro-6,7,7a,8,9,10,11,11a-octahydro-5H-benzo[b]pyrido[3,4-g][1,4]oxazocin-5-ol (3ah)**

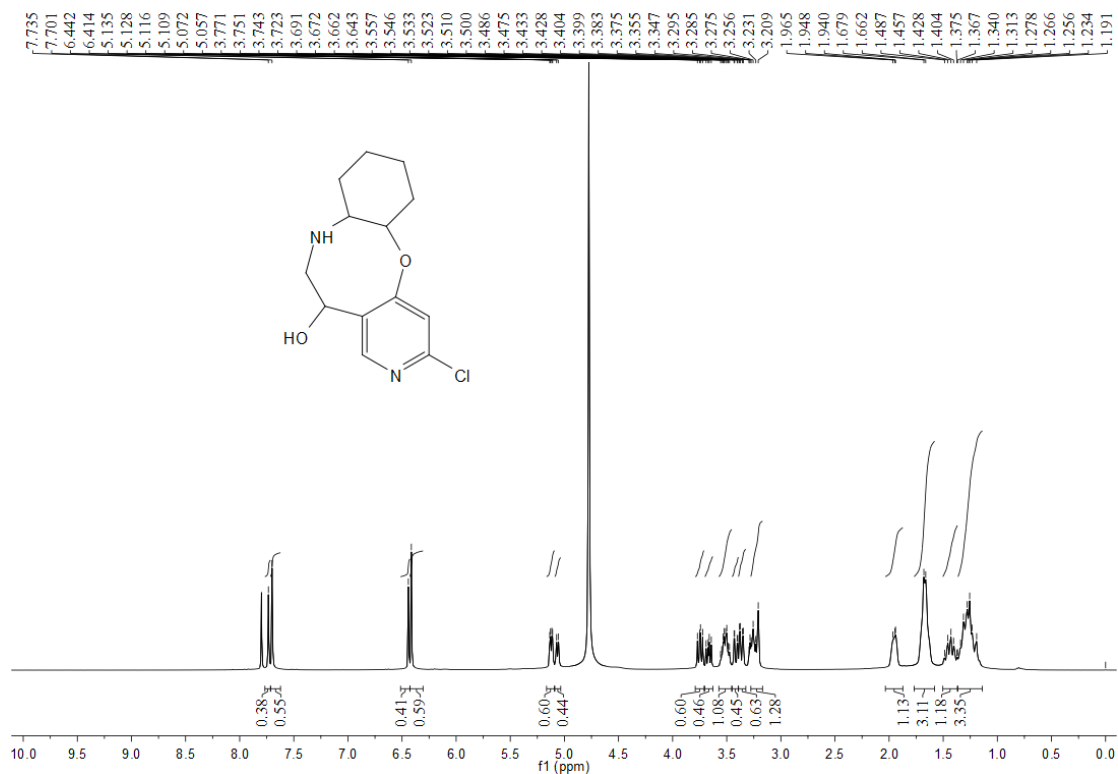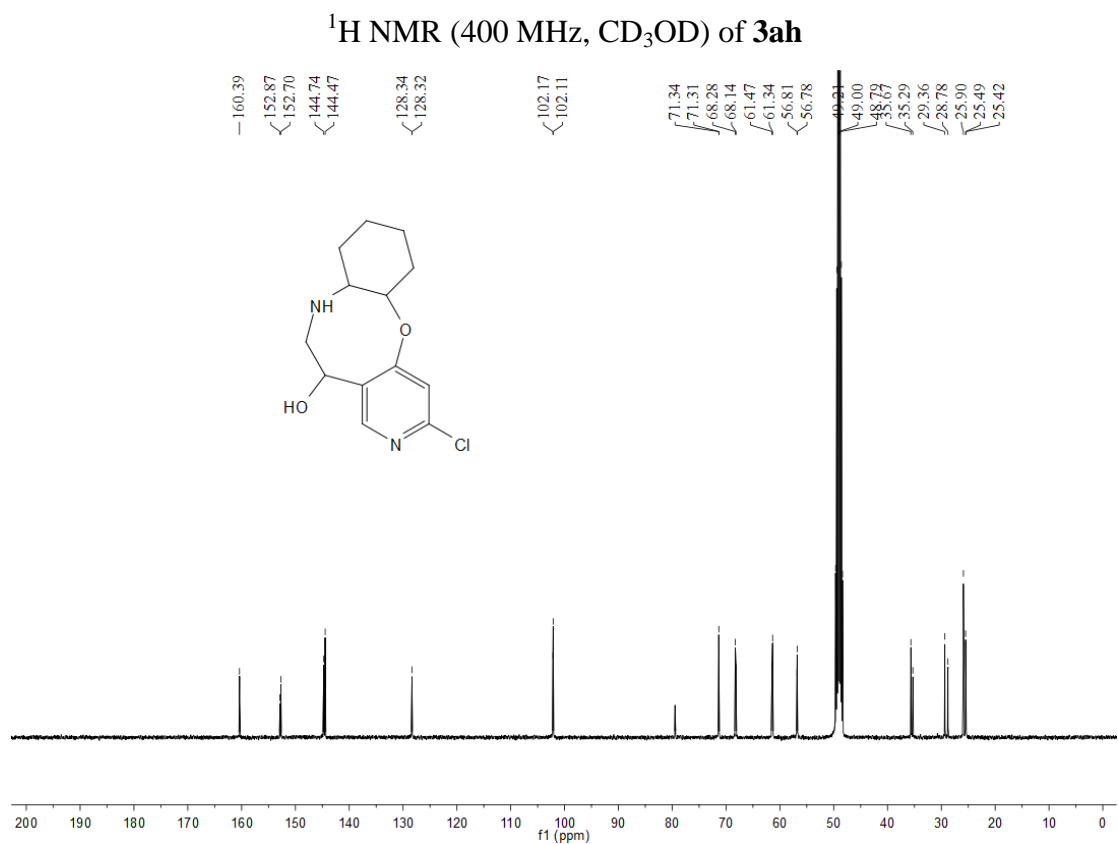

### 9-chloro-4-methyl-3,4,5,6-tetrahydro-2H-pyrido[3,4-g][1,4]oxazocin-6-ol (3ai)

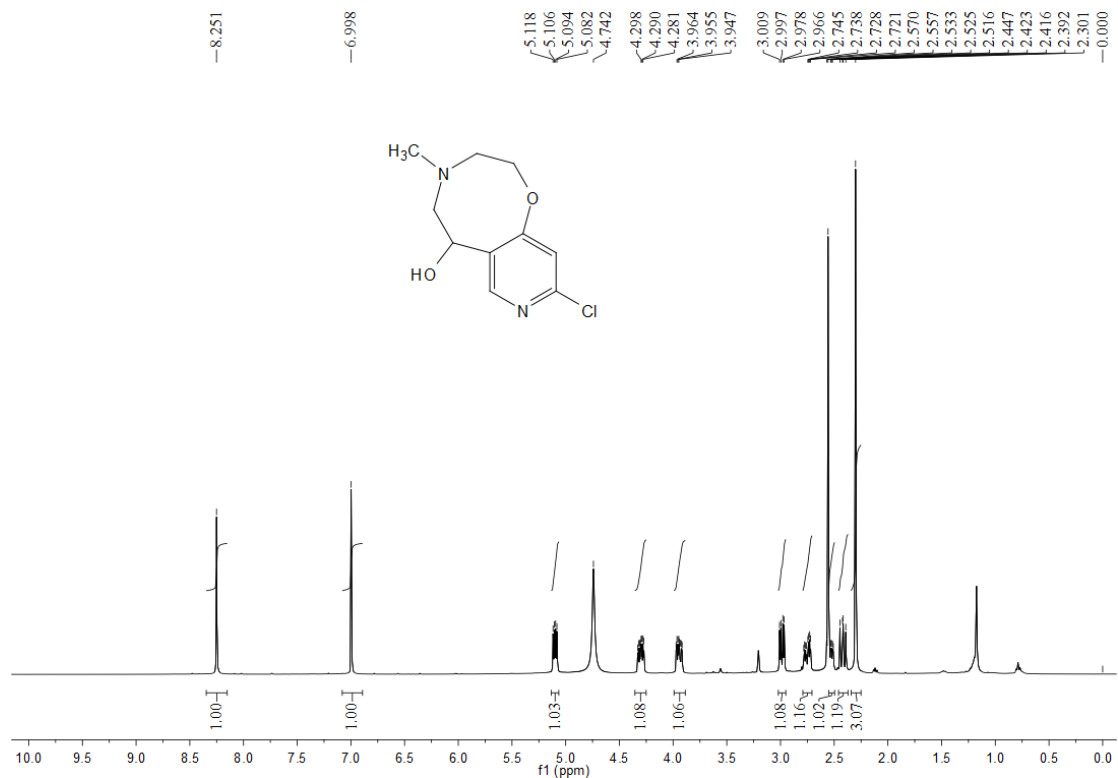

<sup>1</sup>H NMR (400 MHz, CD<sub>3</sub>OD) of **3ai**

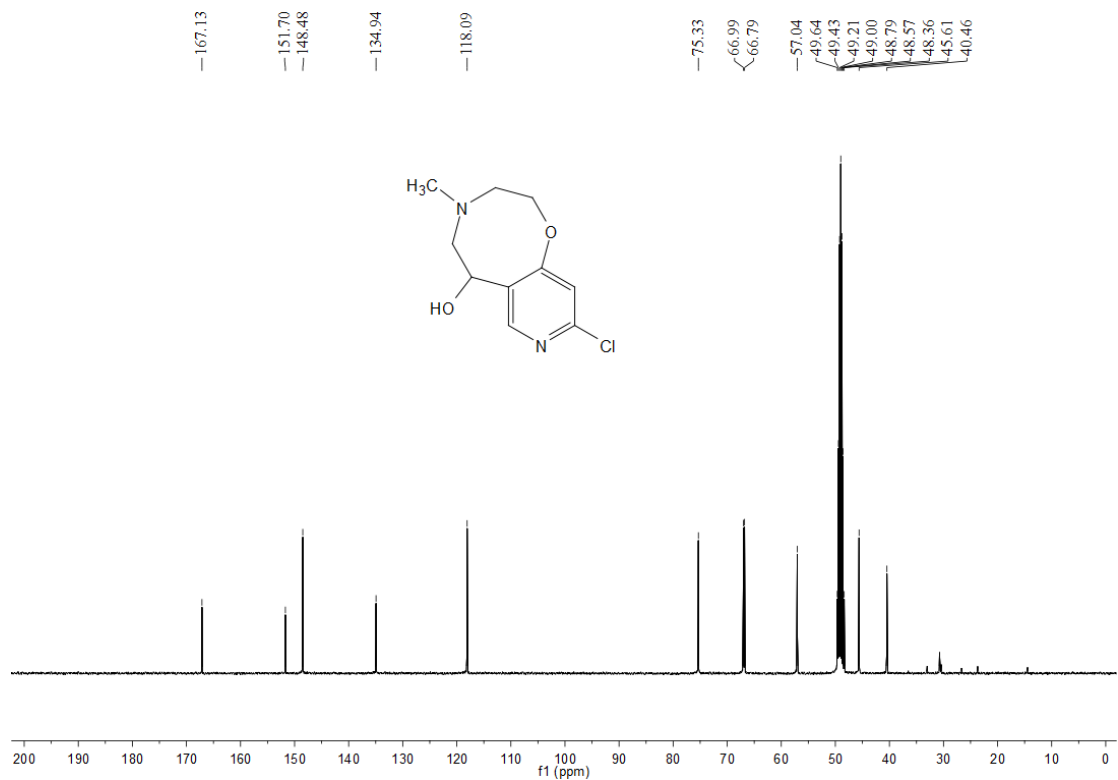

<sup>13</sup>C NMR (100 MHz, CD<sub>3</sub>OD) of **3ai**

**9-chloro-4-ethyl-3,4,5,6-tetrahydro-2H-pyrido[3,4-g][1,4]oxazocin-6-ol (3aj)**

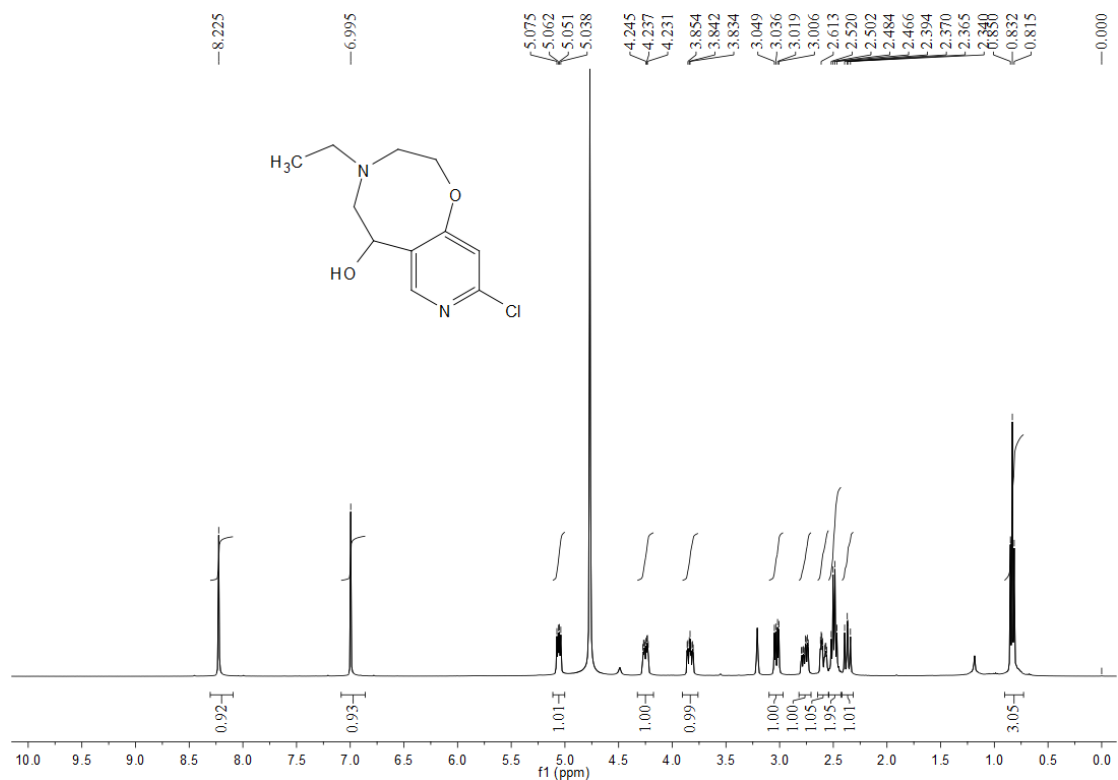

<sup>1</sup>H NMR (400 MHz, CD<sub>3</sub>OD) of **3aj**

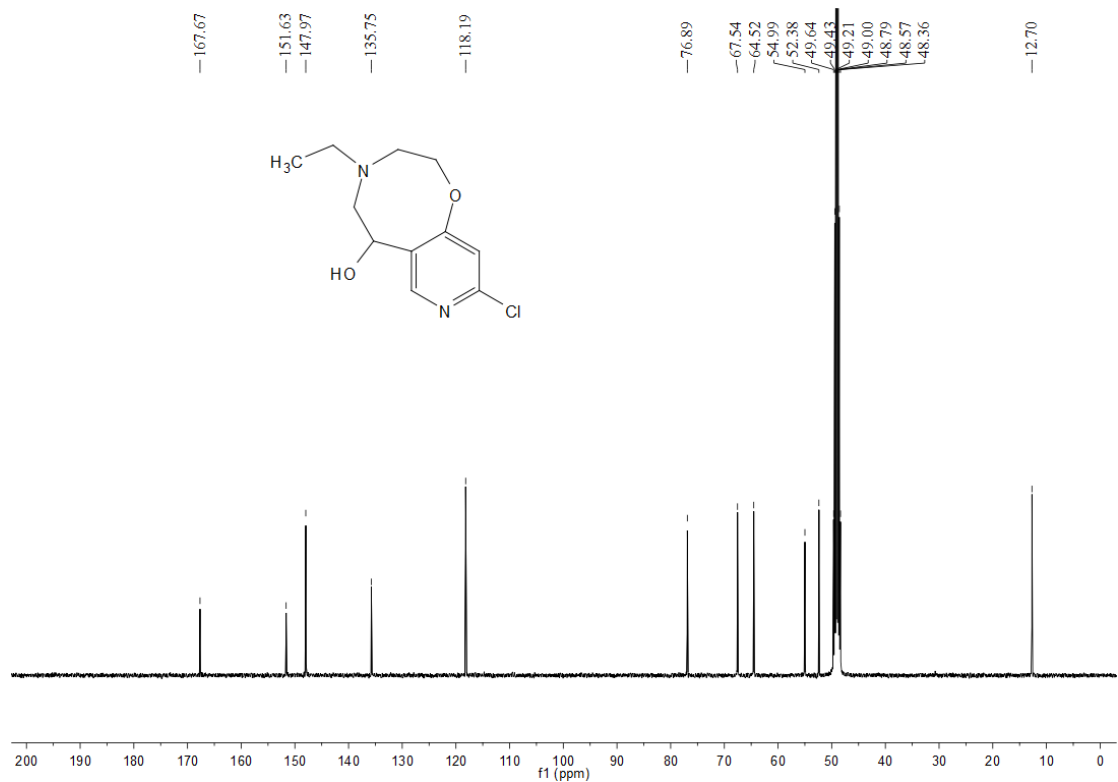

<sup>13</sup>C NMR (100 MHz, CD<sub>3</sub>OD) of **3aj**

### 4-butyl-9-chloro-3,4,5,6-tetrahydro-2H-pyrido[3,4-g][1,4]oxazocin-6-ol (3ak)

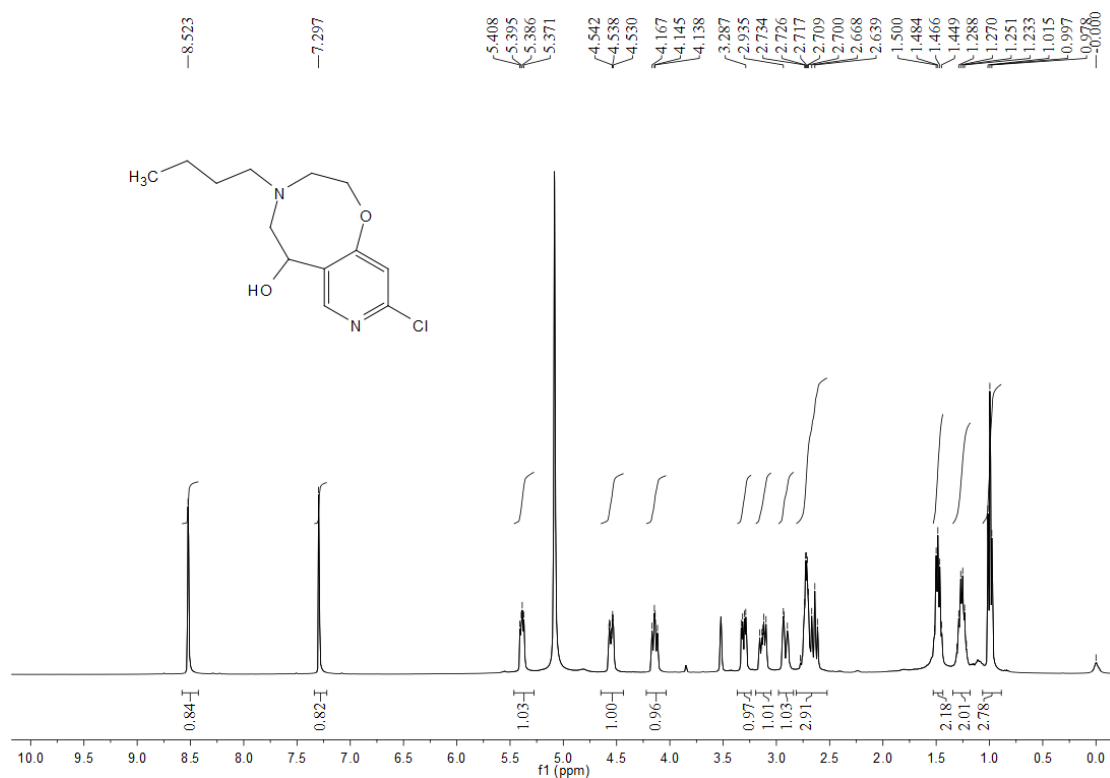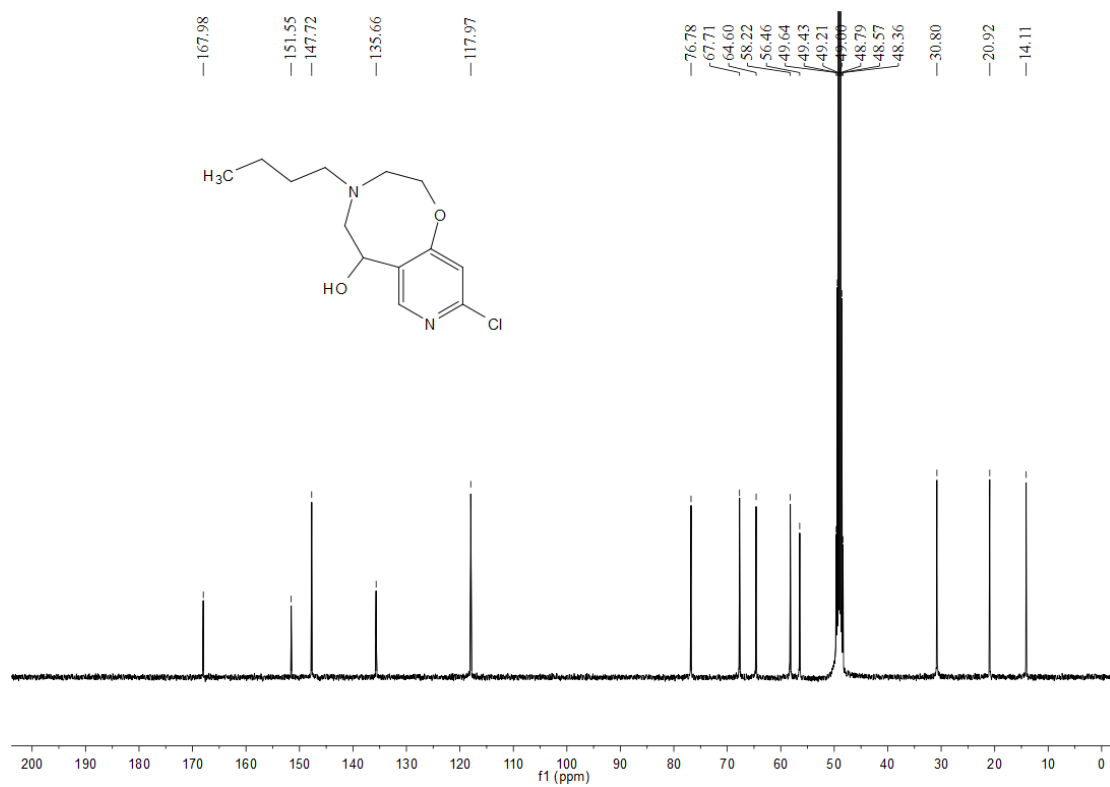

### 4-benzyl-9-chloro-3,4,5,6-tetrahydro-2H-pyrido[3,4-g][1,4]oxazocin-6-ol (3a1)

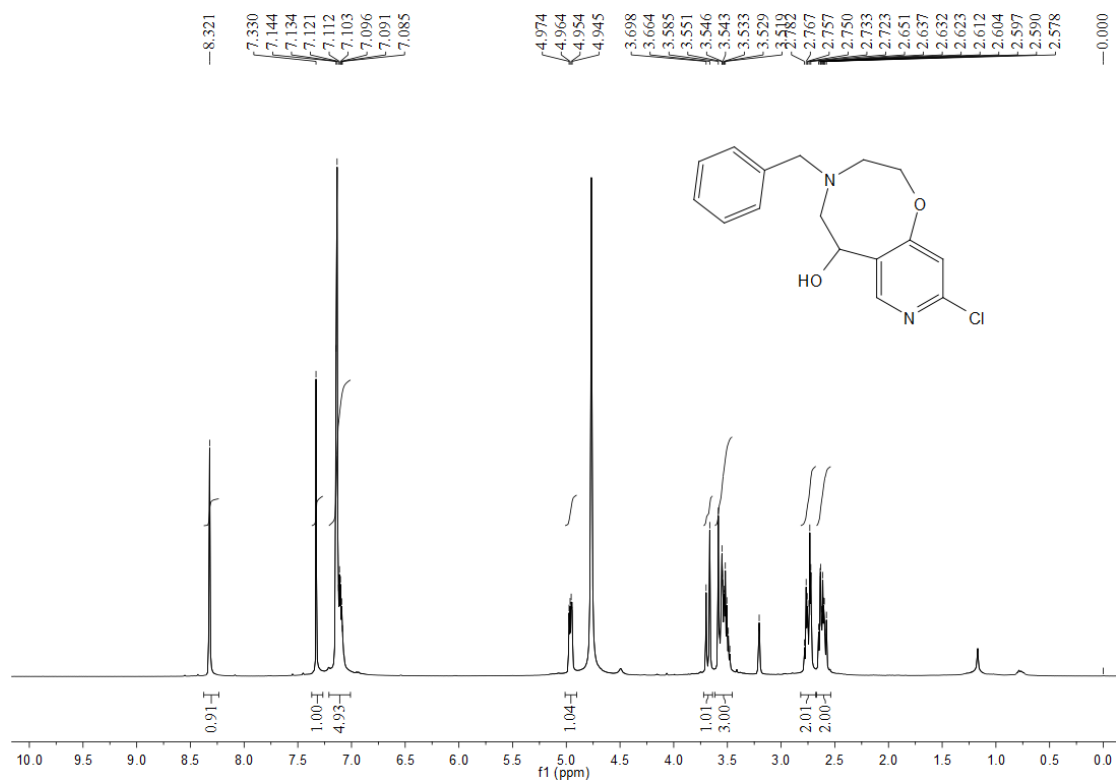

<sup>1</sup>H NMR (400 MHz, CD<sub>3</sub>OD) of **3a1**

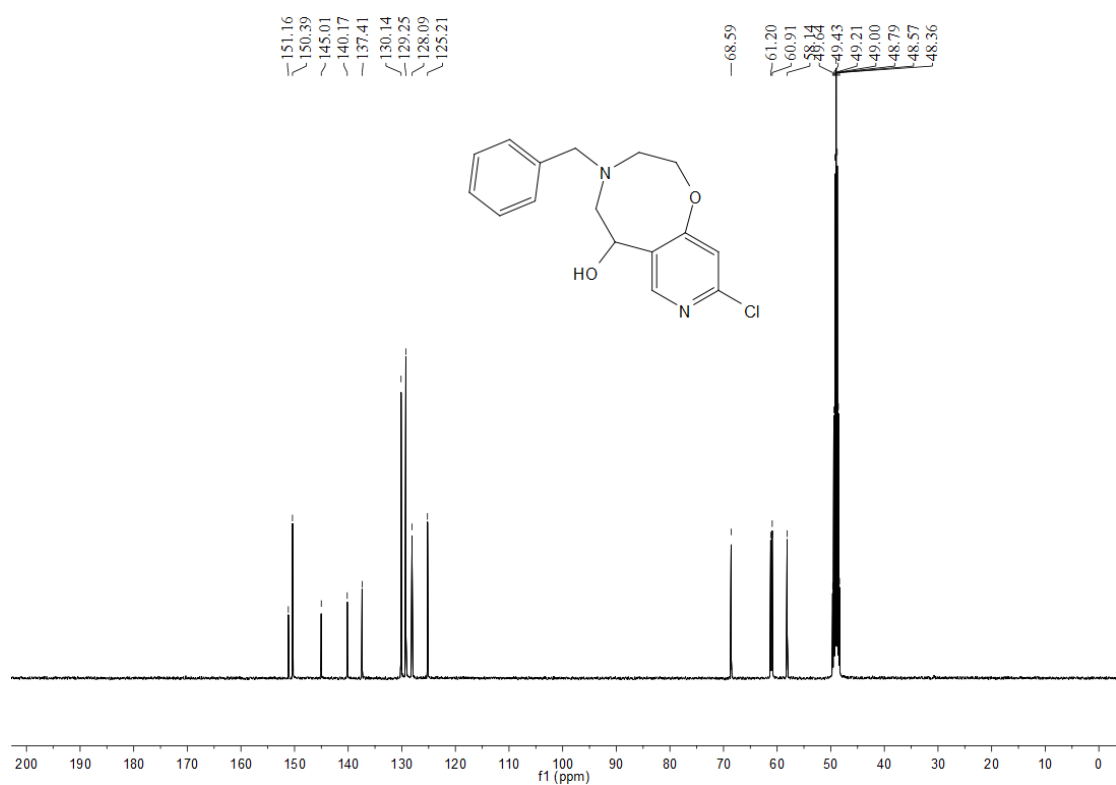

<sup>13</sup>C NMR (100 MHz, CD<sub>3</sub>OD) of **3a1**

**9-chloro-4-(thiophen-2-ylmethyl)-3,4,5,6-tetrahydro-2H-pyrido[3,4-g][1,4]oxazocin-6-ol (3am)**

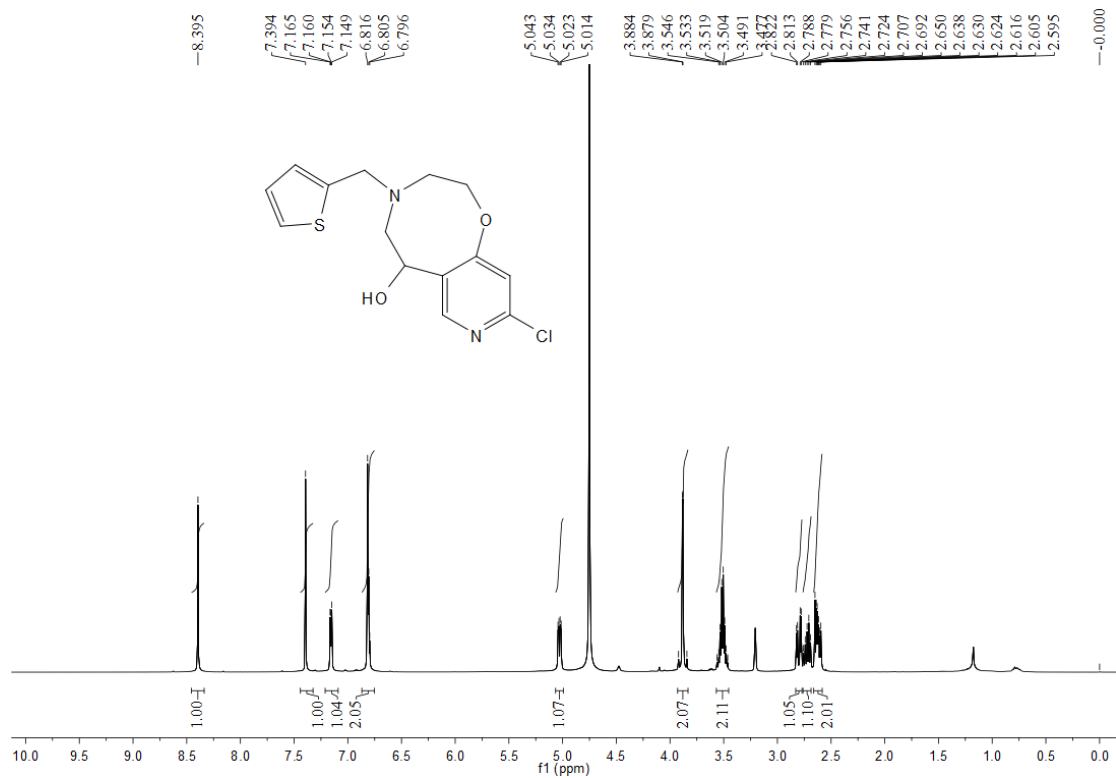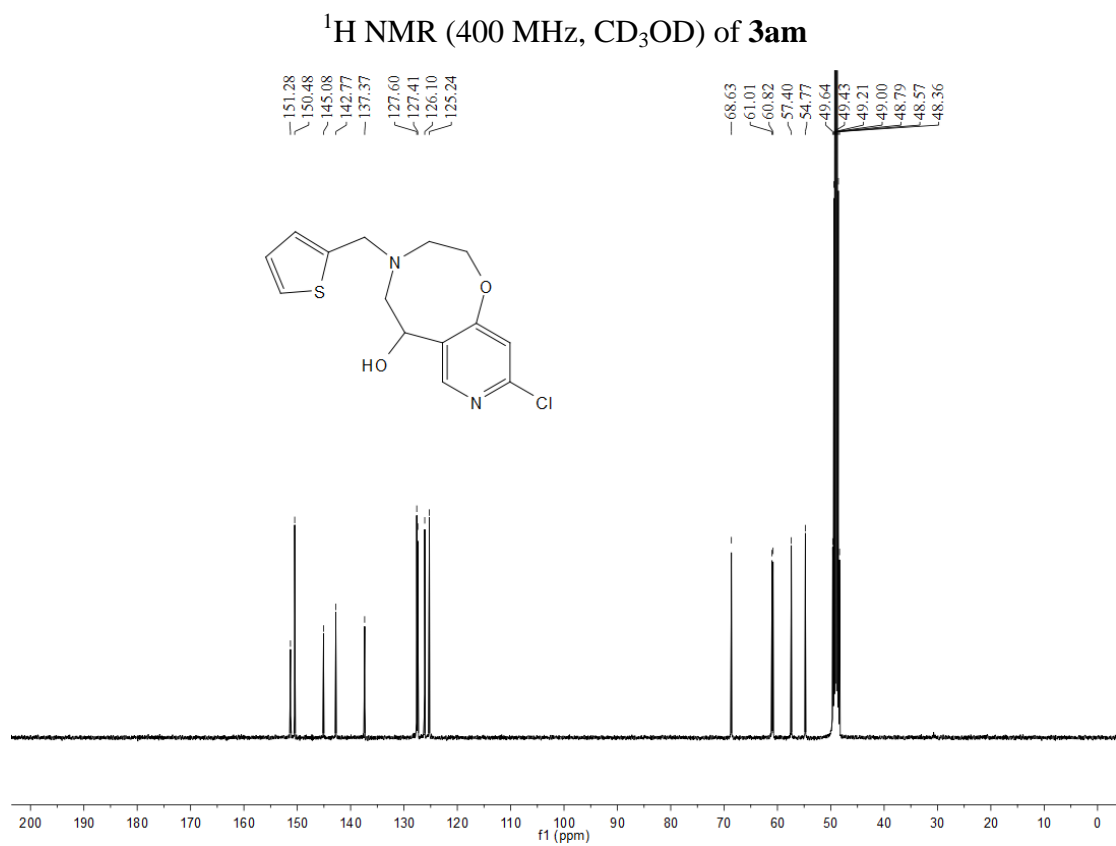

### 4-butyl-3,4,5,6-tetrahydro-2H-pyrido[3,4-g][1,4]oxazocin-6-ol (3bk)

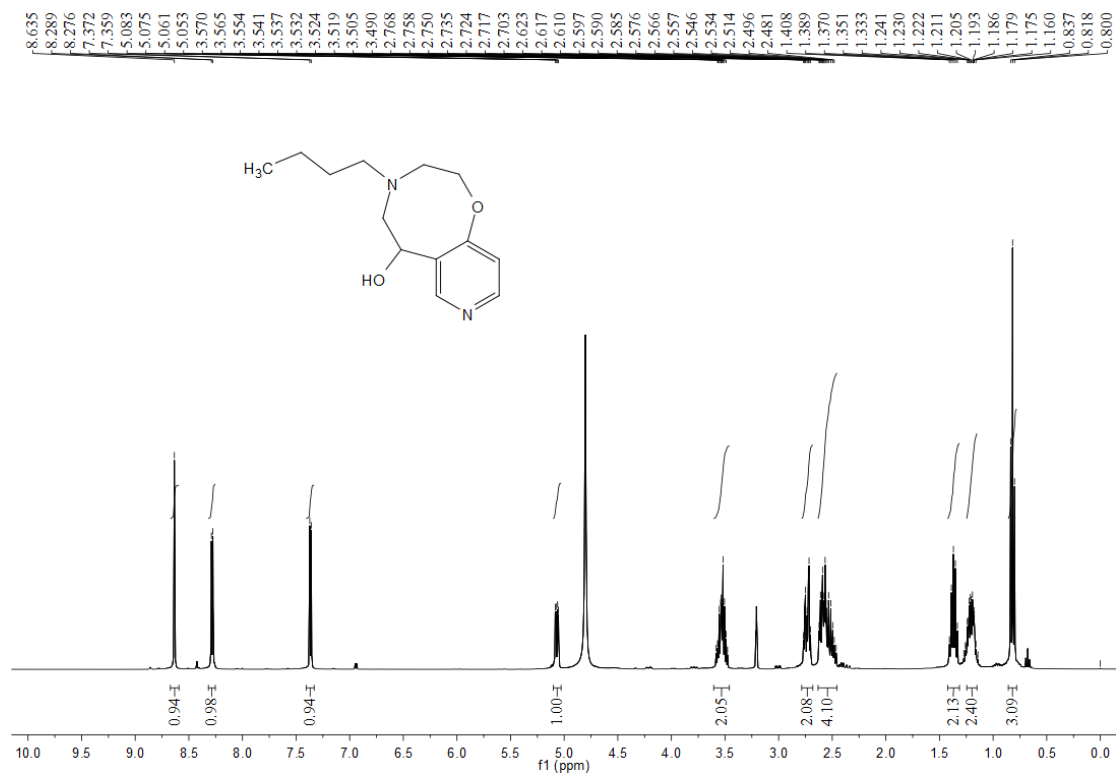

<sup>1</sup>H NMR (400 MHz, CD<sub>3</sub>OD) of **3bk**

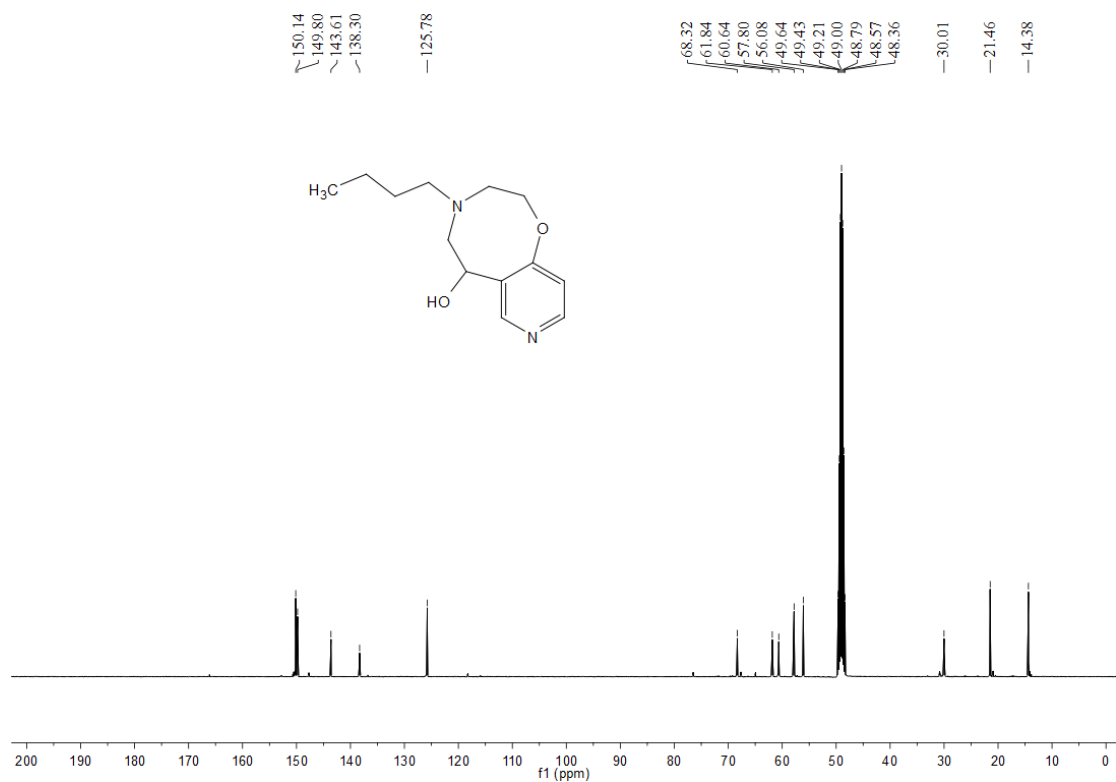

<sup>13</sup>C NMR (100 MHz, CD<sub>3</sub>OD) of **3bk**



### 4-isopropyl-3,4,5,6-tetrahydro-2H-pyrido[3,4-g][1,4]oxazocin-6-ol (3bq)

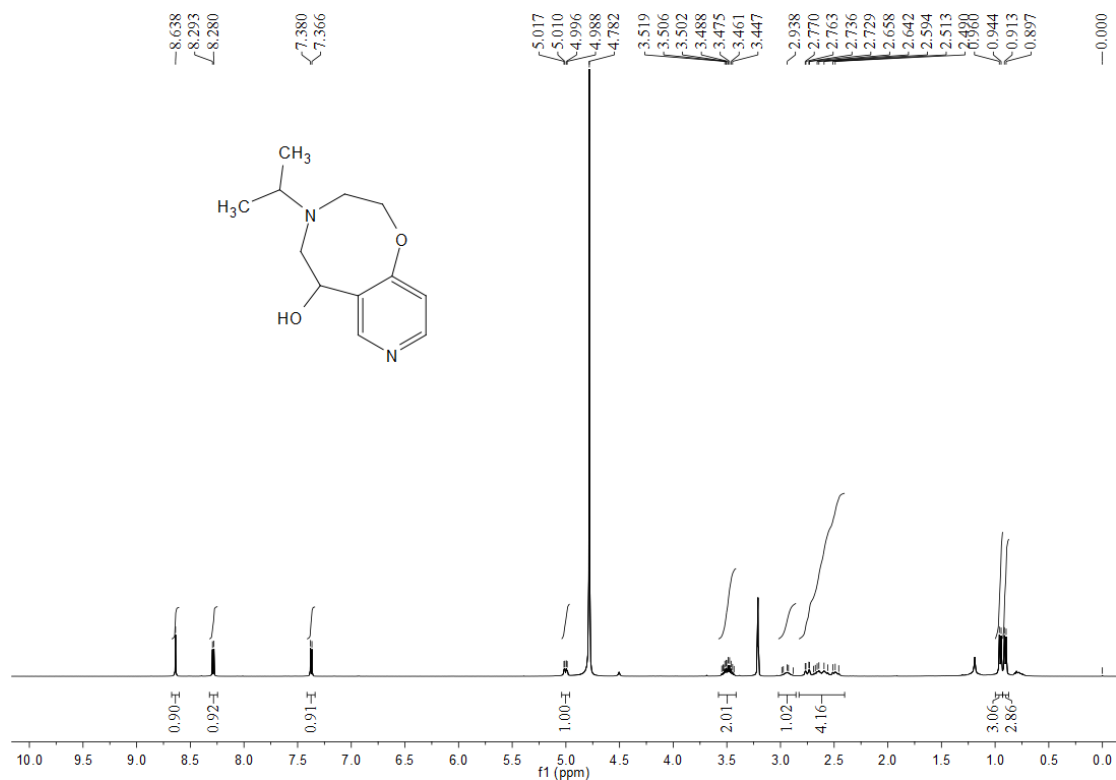

<sup>1</sup>H NMR (400 MHz, CD<sub>3</sub>OD) of **3bq**

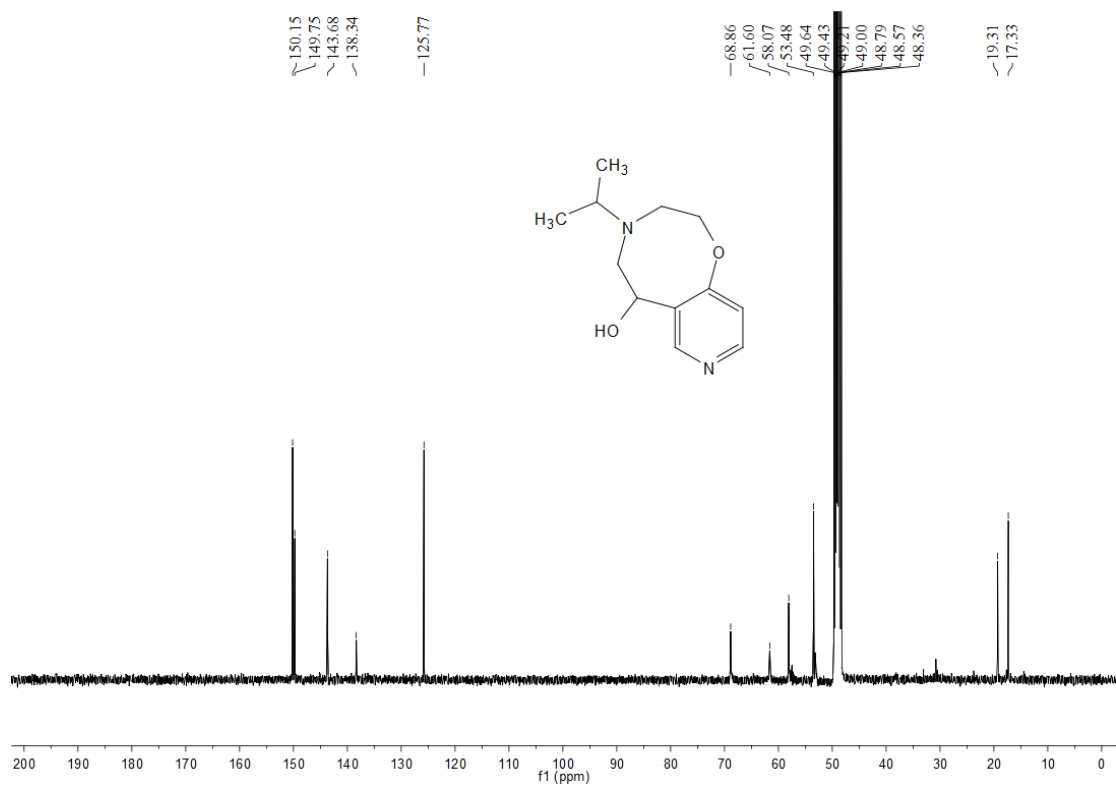

<sup>13</sup>C NMR (100 MHz, CD<sub>3</sub>OD) of **3bq**

### 4-cyclohexyl-3,4,5,6-tetrahydro-2H-pyrido[3,4-g][1,4]oxazocin-6-ol (3br)

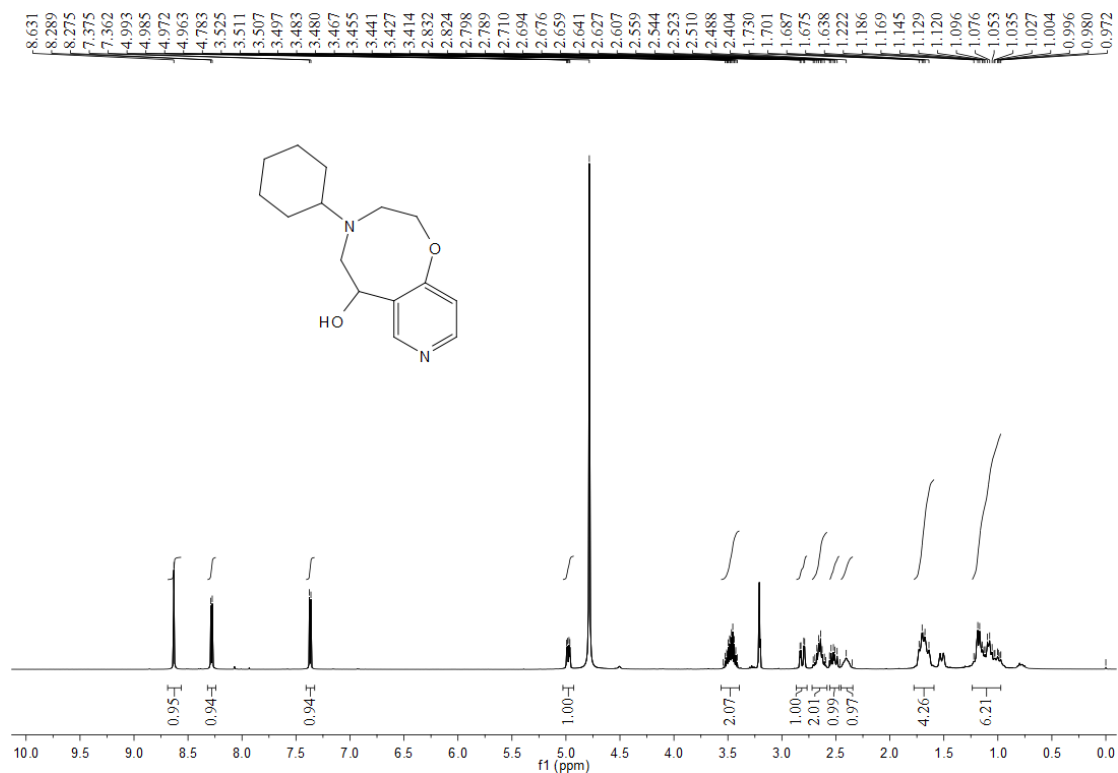

<sup>1</sup>H NMR (400 MHz, CD<sub>3</sub>OD) of **3br**

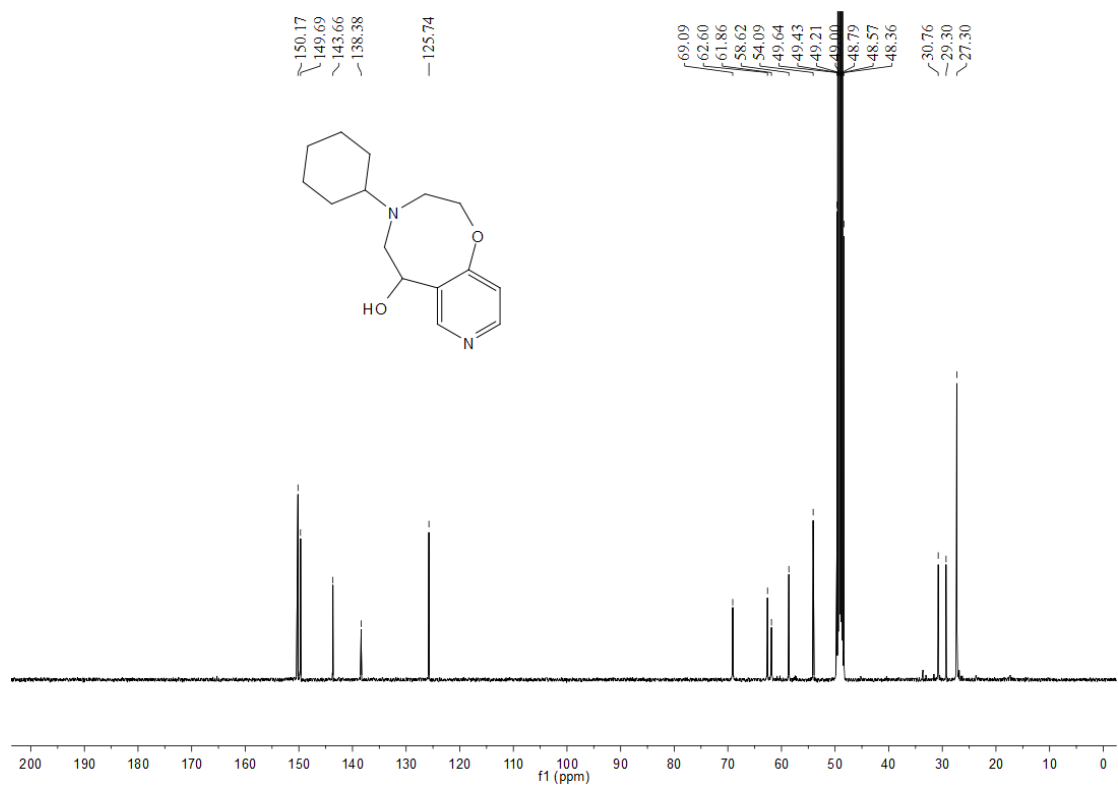

<sup>13</sup>C NMR (100 MHz, CD<sub>3</sub>OD) of **3br**

**4-benzyl-3,4,5,6-tetrahydro-2H-pyrido[3,4-g][1,4]oxazocin-6-ol (3bl)**

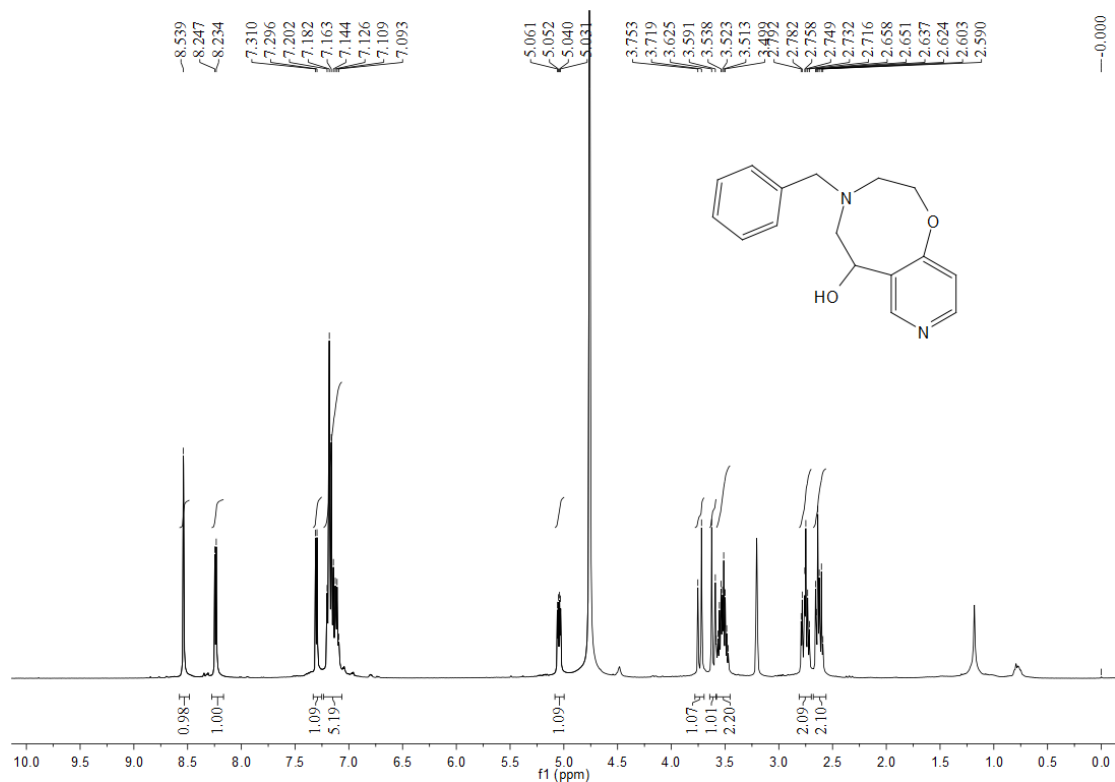

**<sup>1</sup>H NMR (400 MHz, CD<sub>3</sub>OD) of 3bl**

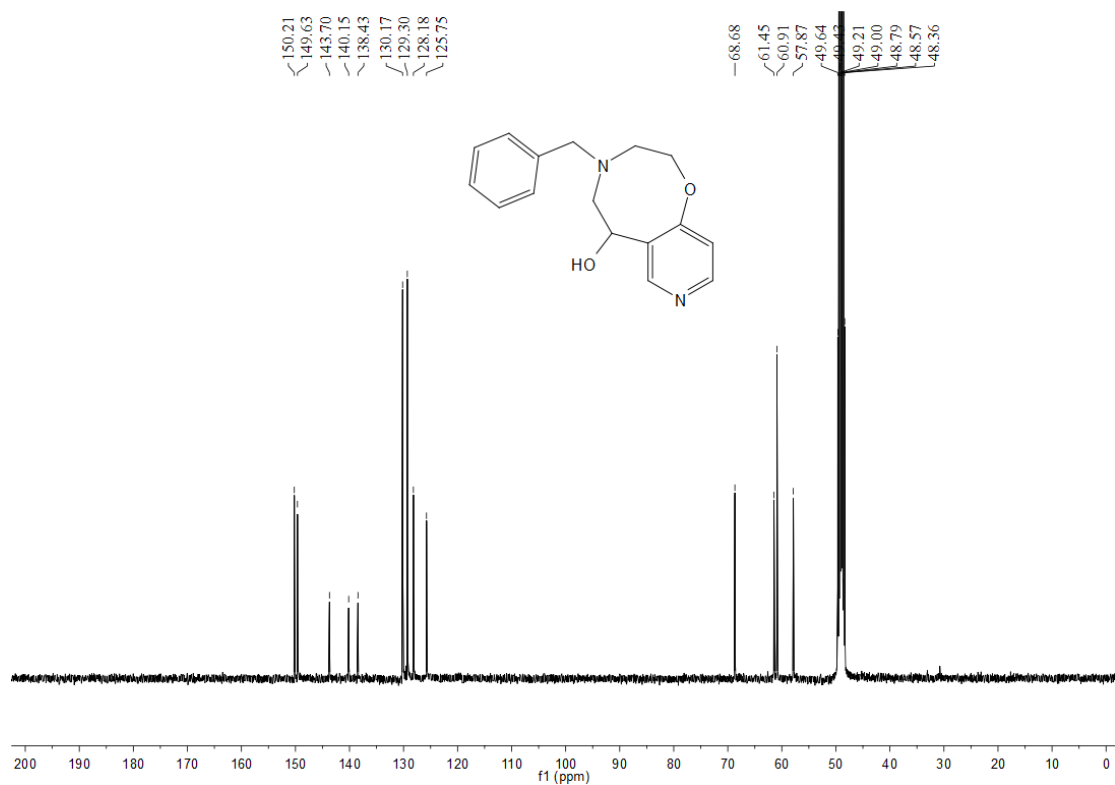

**<sup>13</sup>C NMR (100 MHz, CD<sub>3</sub>OD) of 3bl**

**4-(4-methoxybenzyl)-3,4,5,6-tetrahydro-2H-pyrido[3,4-g][1,4]oxazocin-6-ol (3bs)**

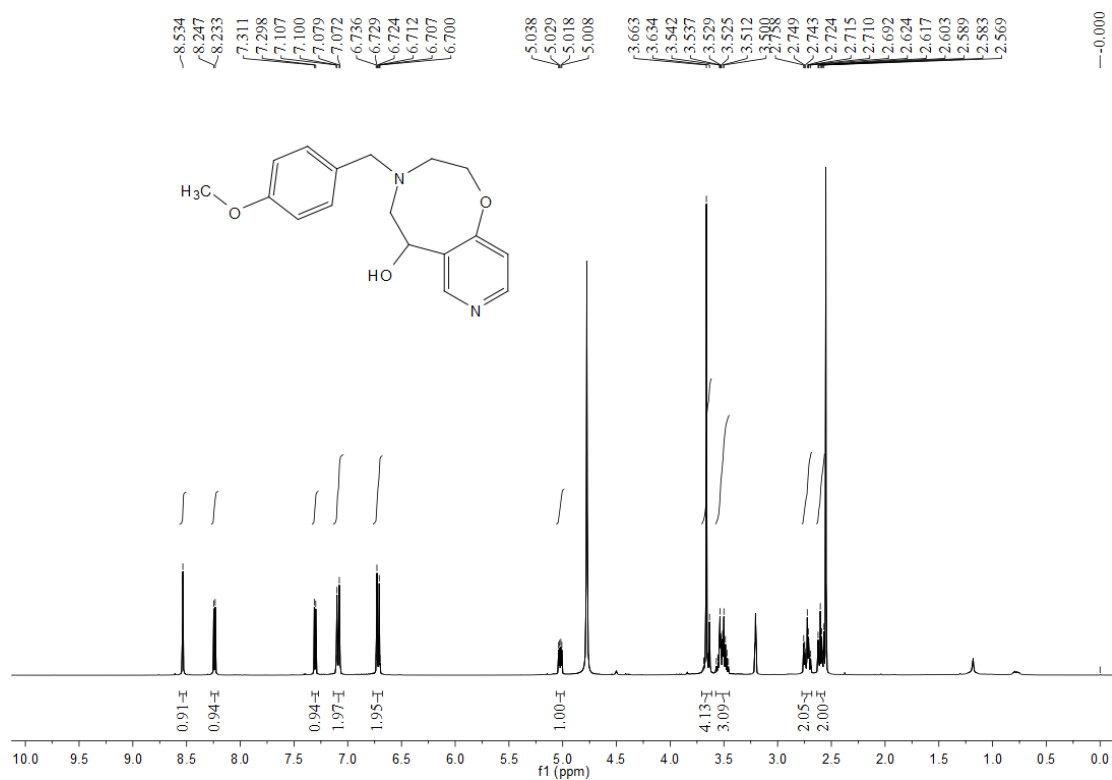

<sup>1</sup>H NMR (400 MHz, CD<sub>3</sub>OD) of **3bs**

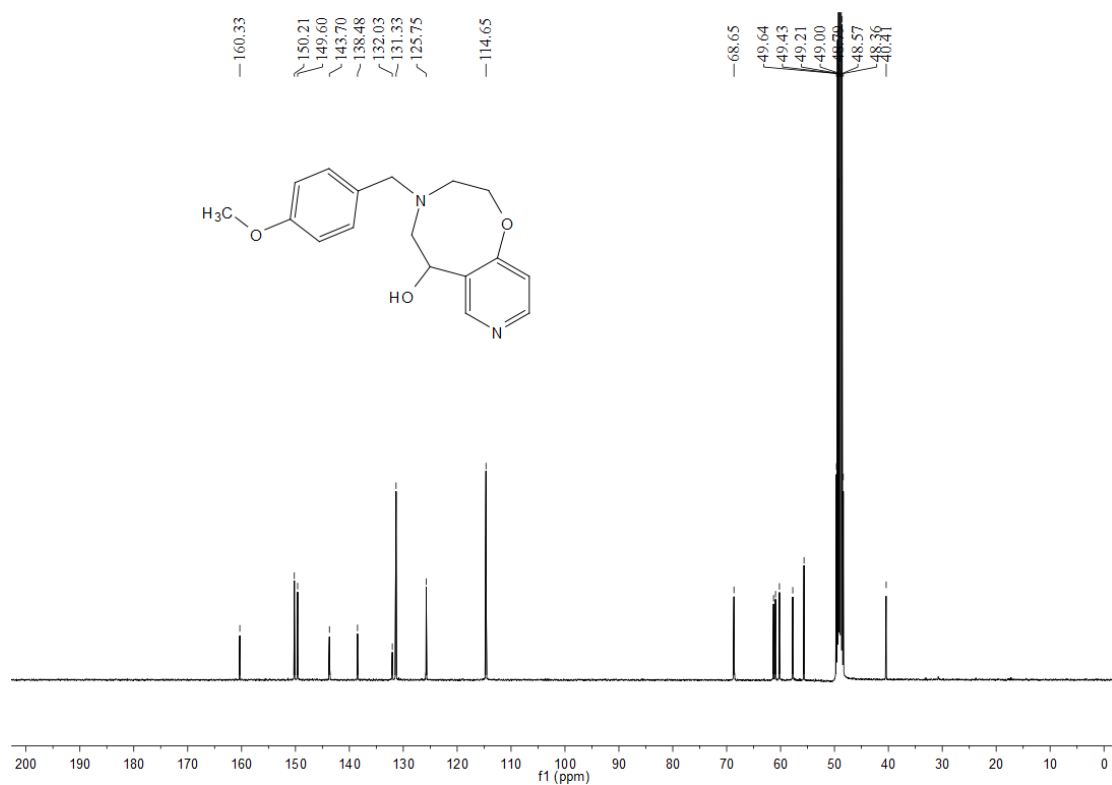

<sup>13</sup>C NMR (100 MHz, CD<sub>3</sub>OD) of **3bs**

# 4-(thiophen-2-ylmethyl)-3,4,5,6-tetrahydro-2H-pyrido[3,4-g][1,4]oxazocin-6-ol

(3bm)

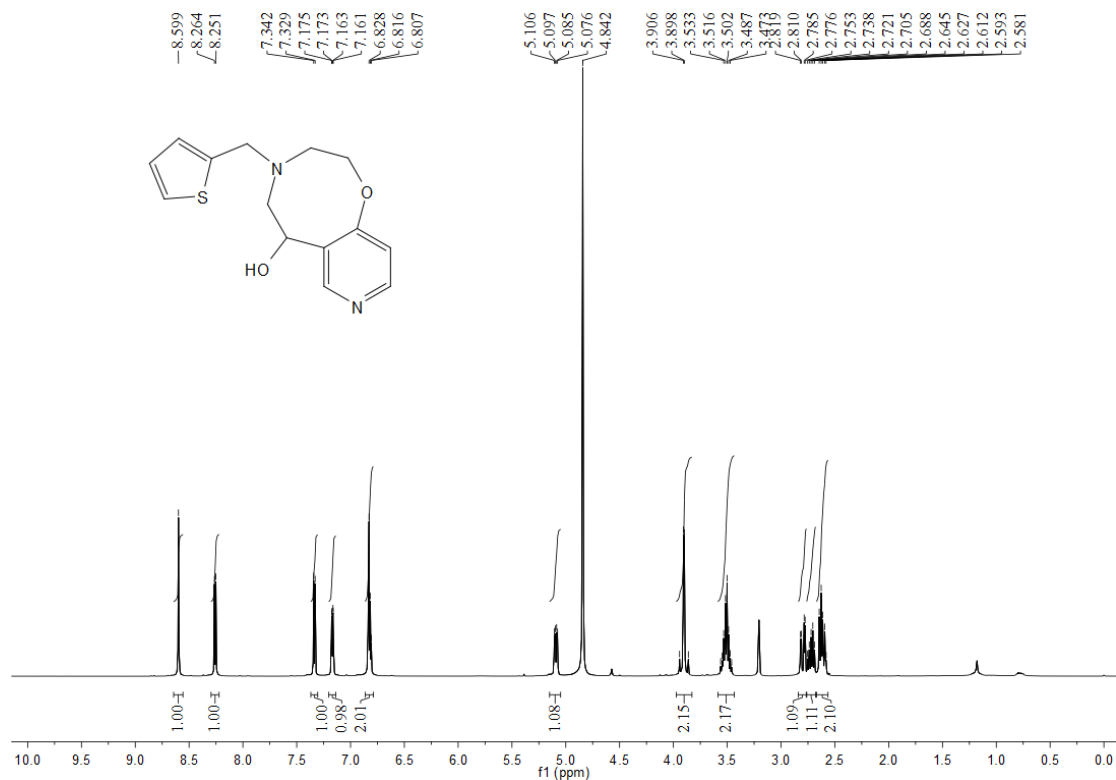

<sup>1</sup>H NMR (400 MHz, CD<sub>3</sub>OD) of 3bm

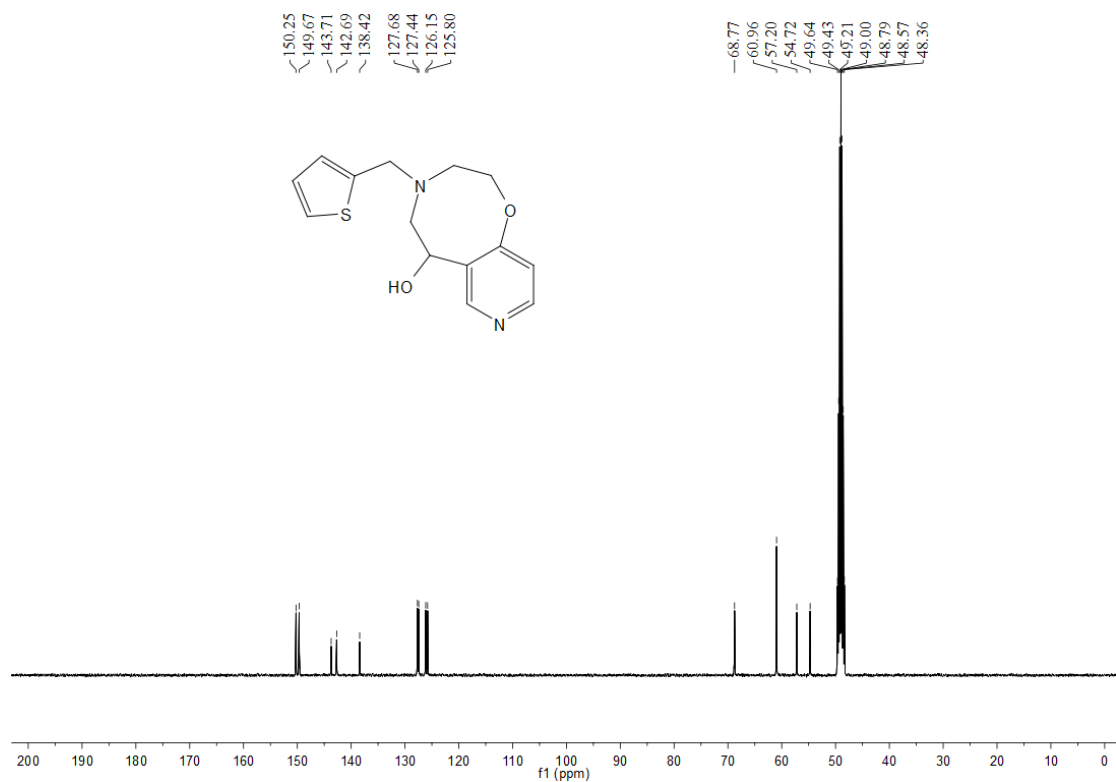

<sup>13</sup>C NMR (100 MHz, CD<sub>3</sub>OD) of 3bm

### 3-benzyl-3,4,5,6-tetrahydro-2H-pyrido[3,4-g][1,4]oxazocin-6-ol (3bt)

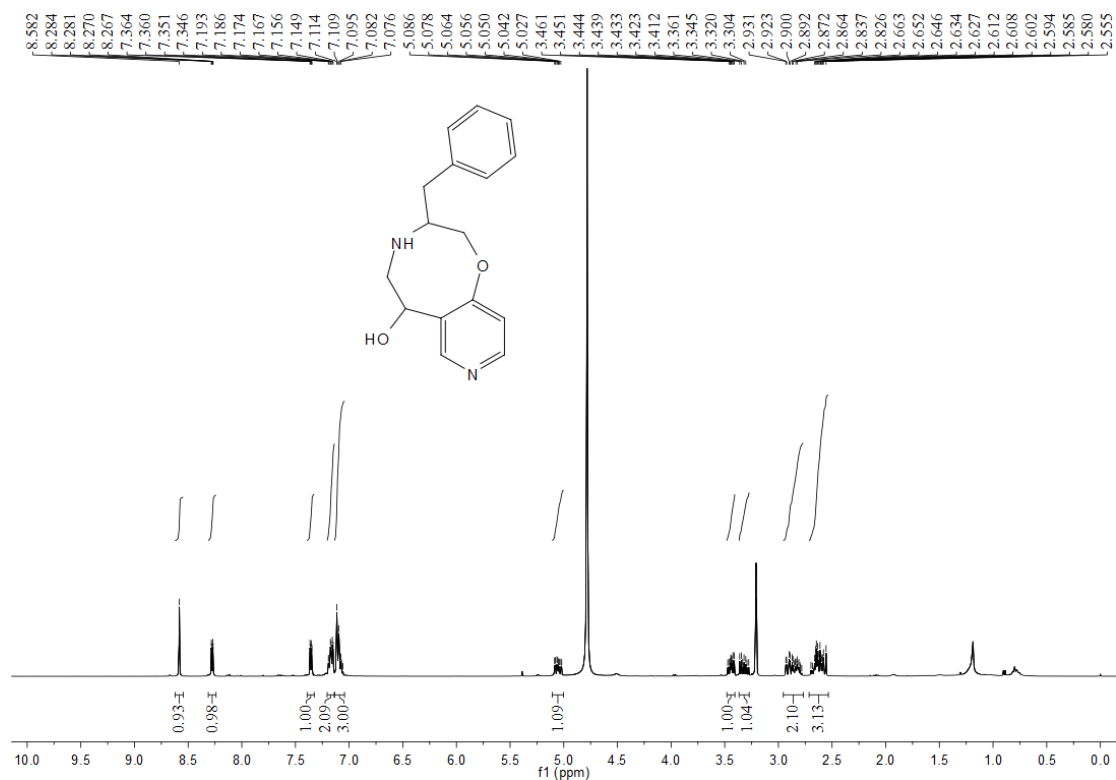

<sup>1</sup>H NMR (400 MHz, CD<sub>3</sub>OD) of **3bt**

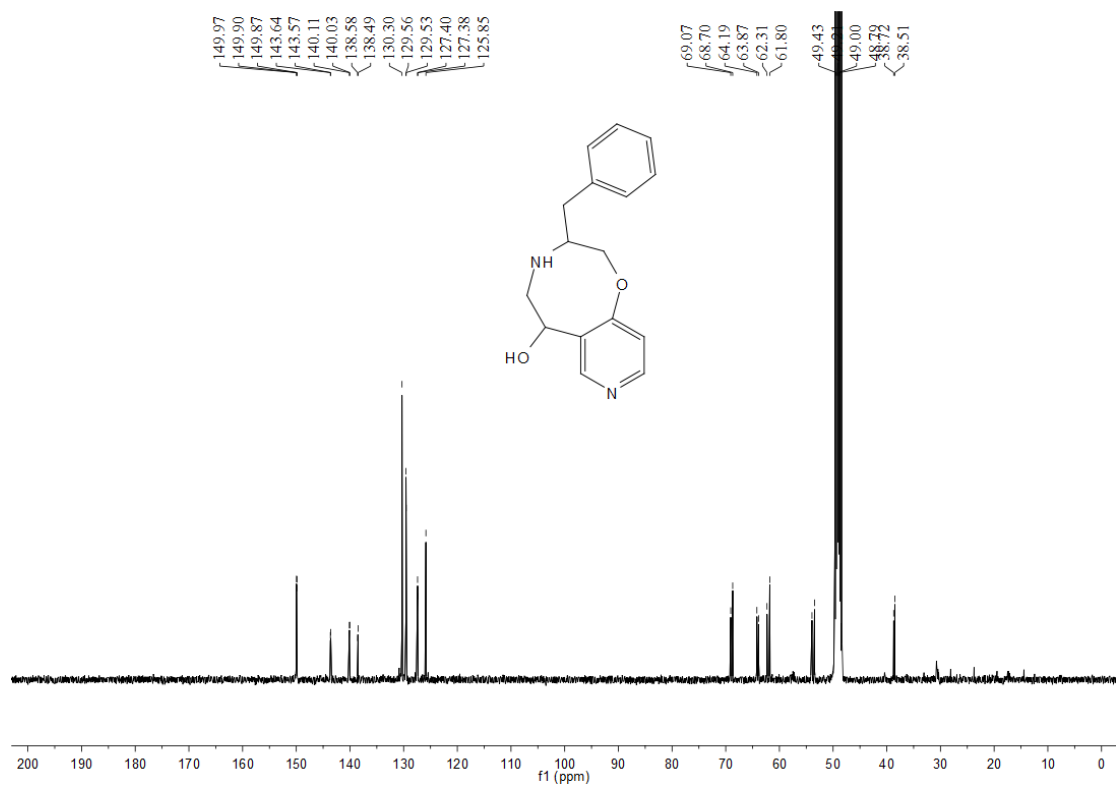

<sup>13</sup>C NMR (100 MHz, CD<sub>3</sub>OD) of **3bt**

### 4-benzyl-9-methyl-3,4,5,6-tetrahydro-2H-pyrido[3,4-g][1,4]oxazocin-6-ol (3cl)

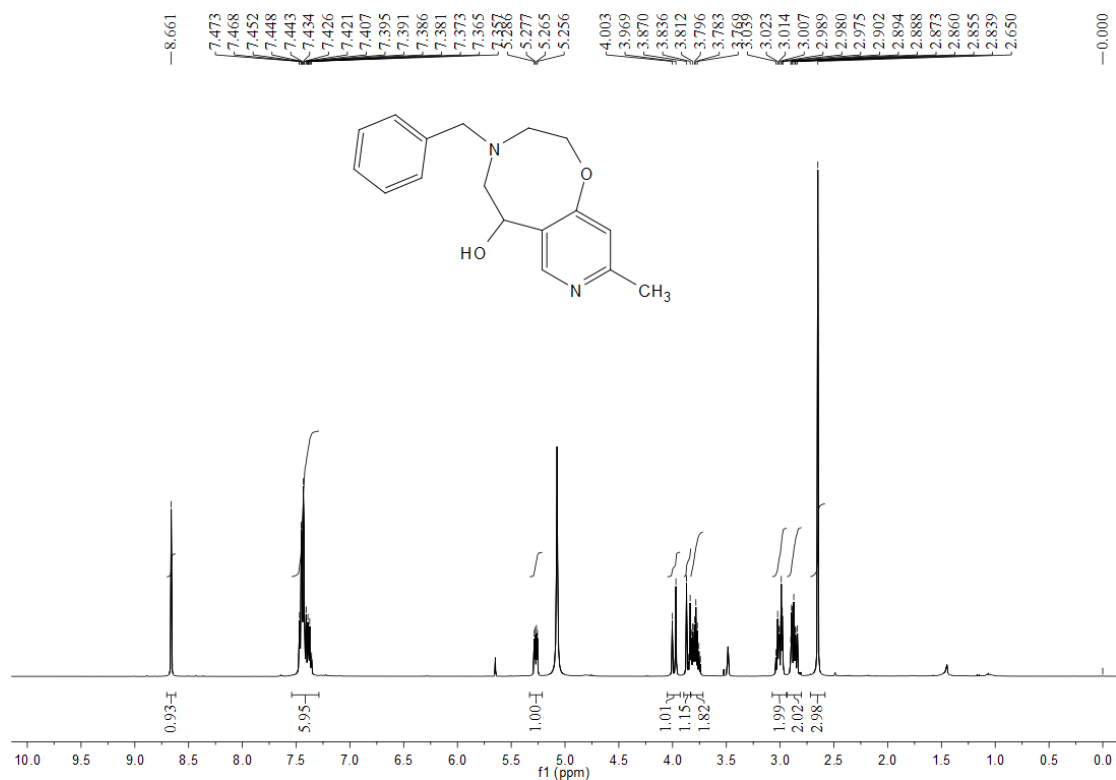

<sup>1</sup>H NMR (400 MHz, CD<sub>3</sub>OD) of **3cl**

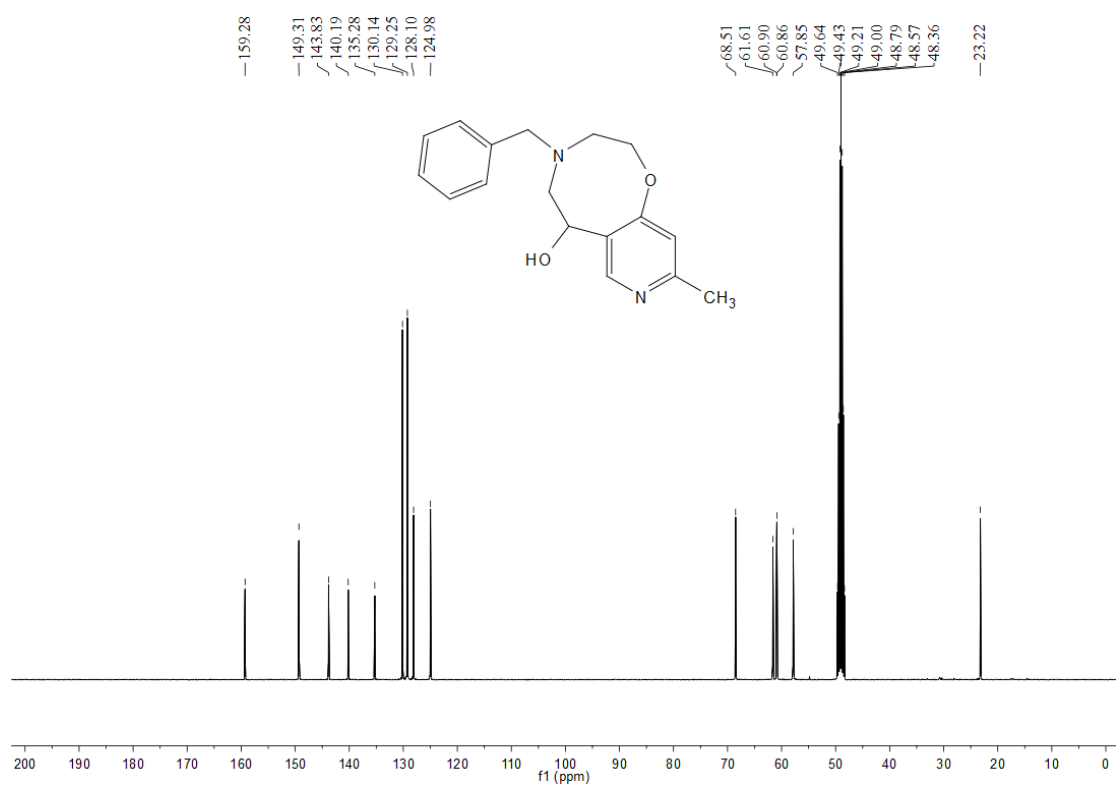

<sup>13</sup>C NMR (100 MHz, CD<sub>3</sub>OD) of **3cl**

**4-benzyl-9-fluoro-3,4,5,6-tetrahydro-2H-pyrido[3,4-g][1,4]oxazocin-6-ol (3dl)**

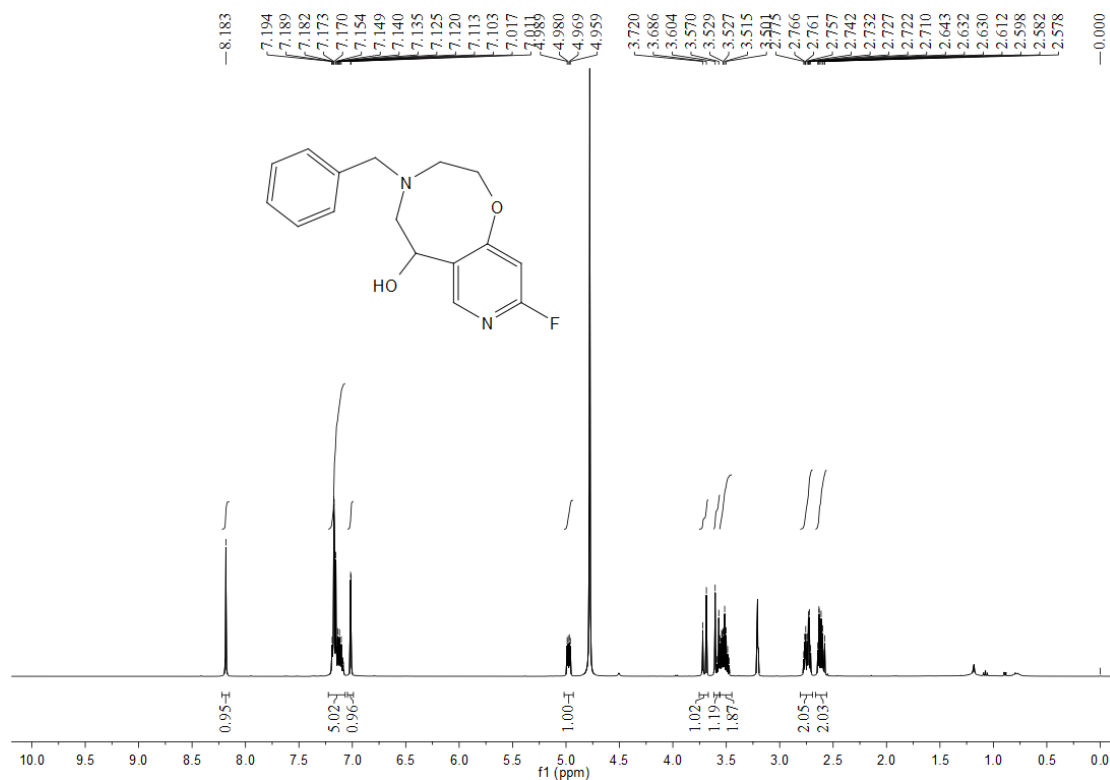

<sup>1</sup>H NMR (400 MHz, CD<sub>3</sub>OD) of **3dl**

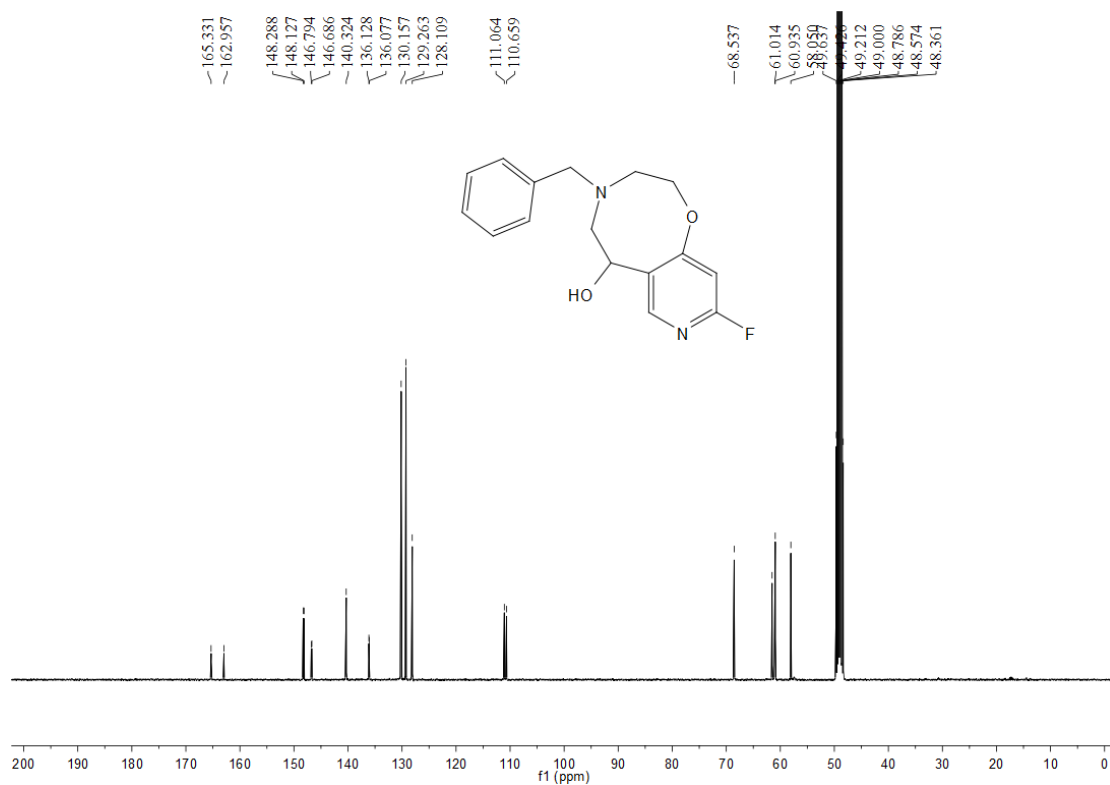

<sup>13</sup>C NMR (100 MHz, CD<sub>3</sub>OD) of **3dl**



**4-benzyl-3,4,5,6-tetrahydro-2H-pyrido[3,2-g][1,4]oxazocin-6-ol (3el)**

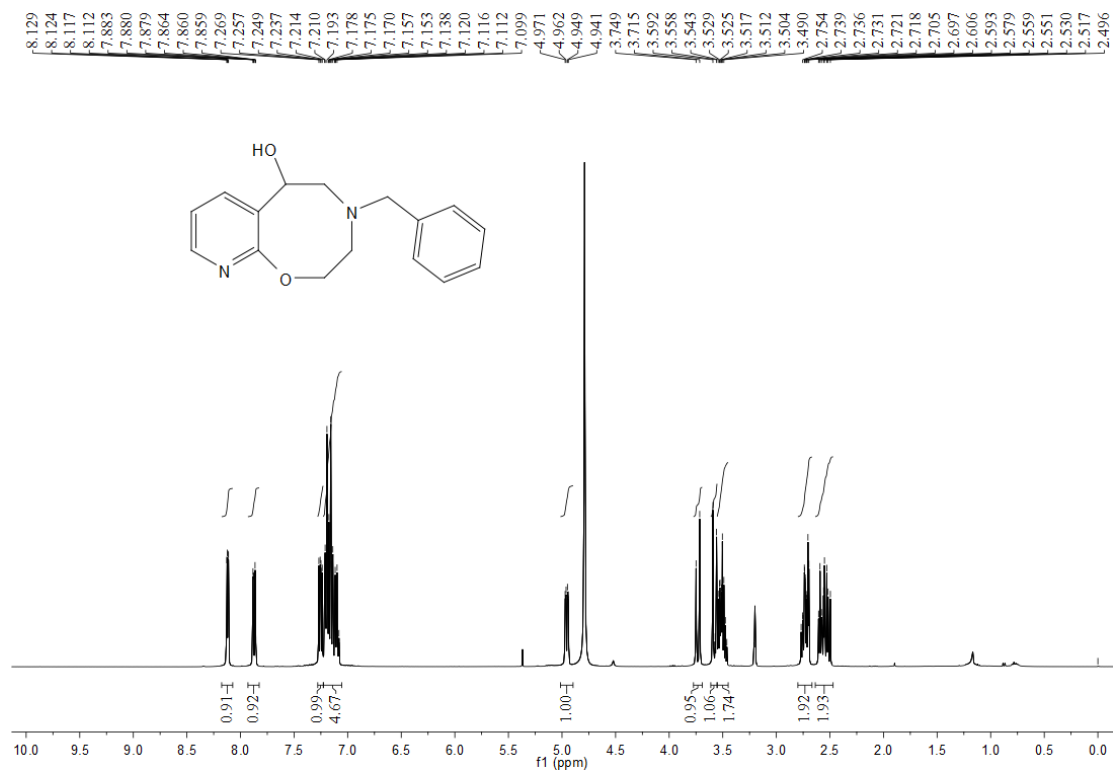

<sup>1</sup>H NMR (400 MHz, CD<sub>3</sub>OD) of 3el

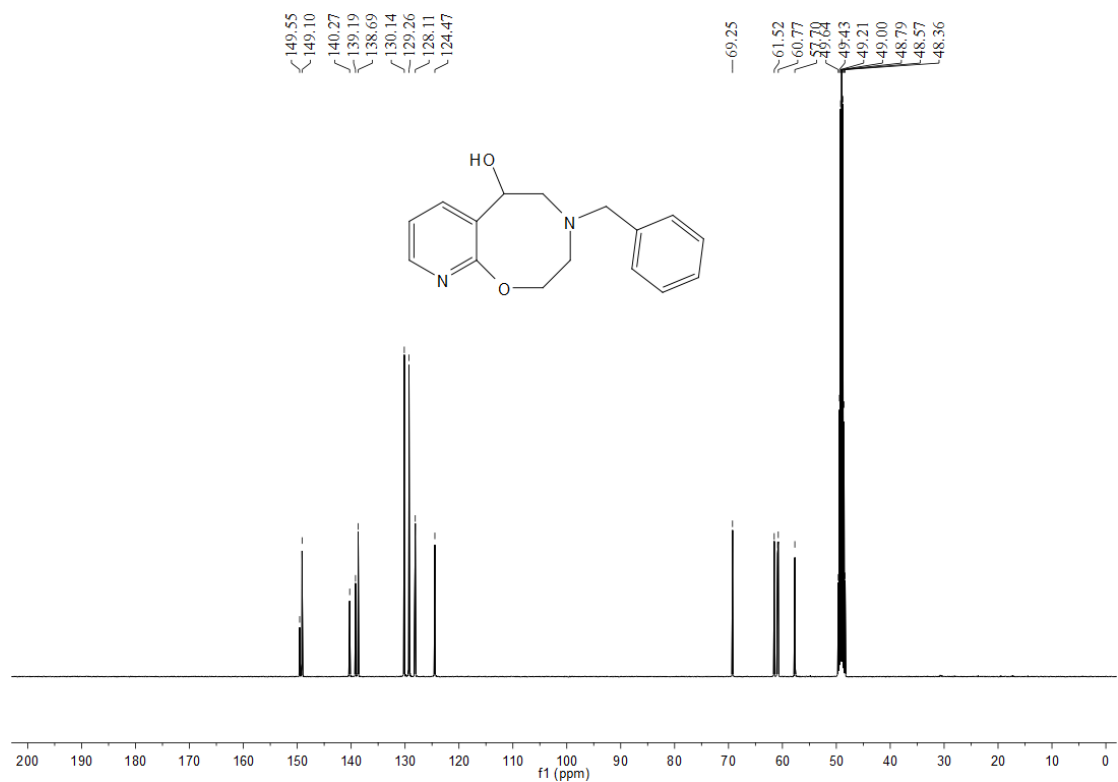

<sup>13</sup>C NMR (100 MHz, CD<sub>3</sub>OD) of 3el

# 4-(thiophen-2-ylmethyl)-3,4,5,6-tetrahydro-2H-pyrido[3,2-g][1,4]oxazocin-6-ol

(3em)

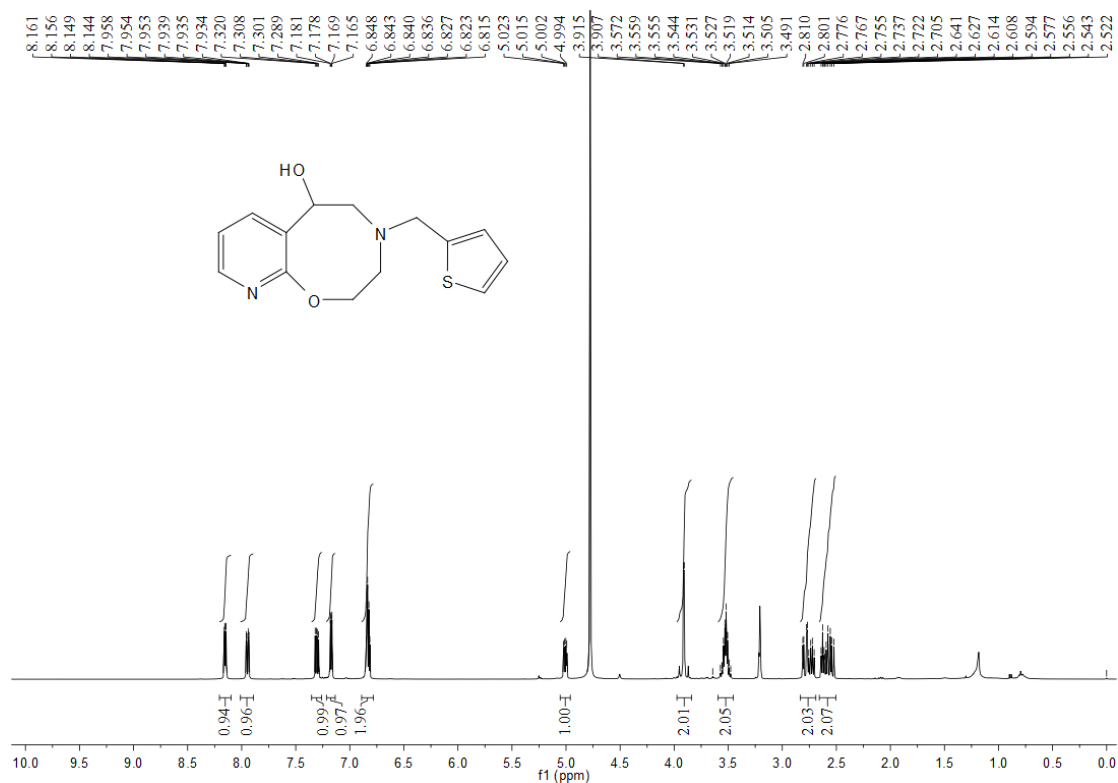

<sup>1</sup>H NMR (400 MHz, CD<sub>3</sub>OD) of **3em**

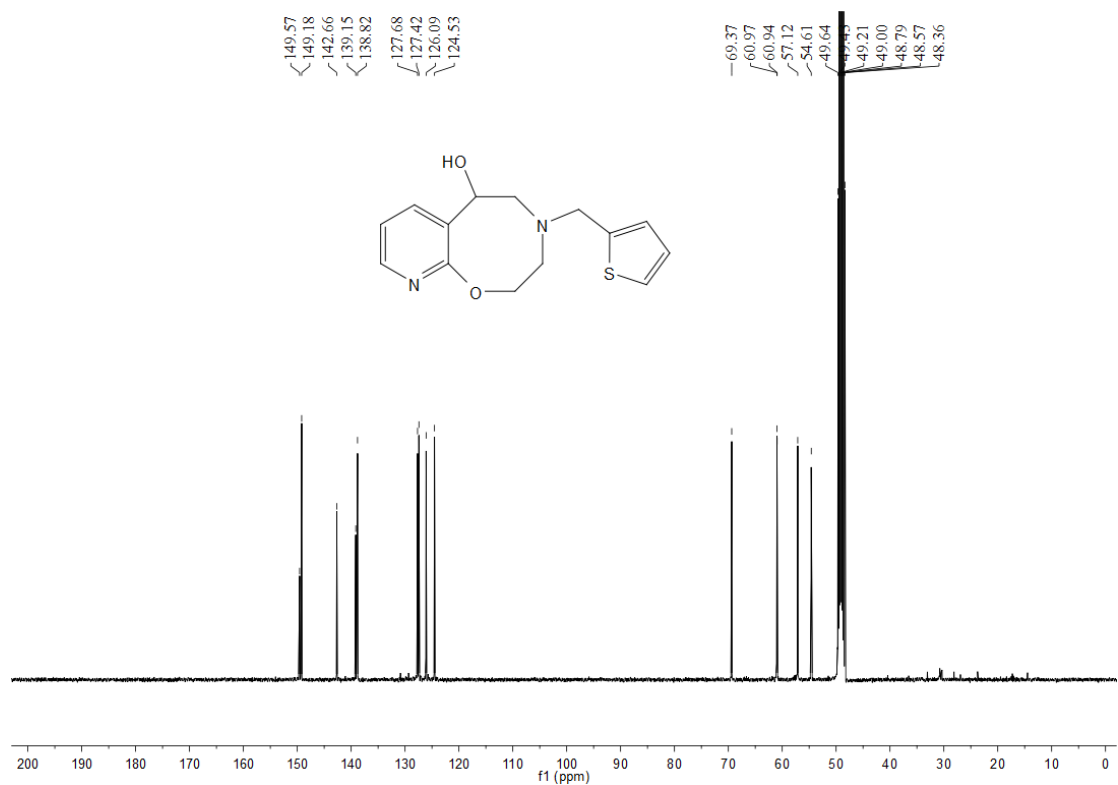

<sup>13</sup>C NMR (100 MHz, CD<sub>3</sub>OD) of **3em**

## 2-phenyl-3,4,5,6-tetrahydro-2H-pyrido[3,2-g][1,4]oxazocin-6-ol (3eu)

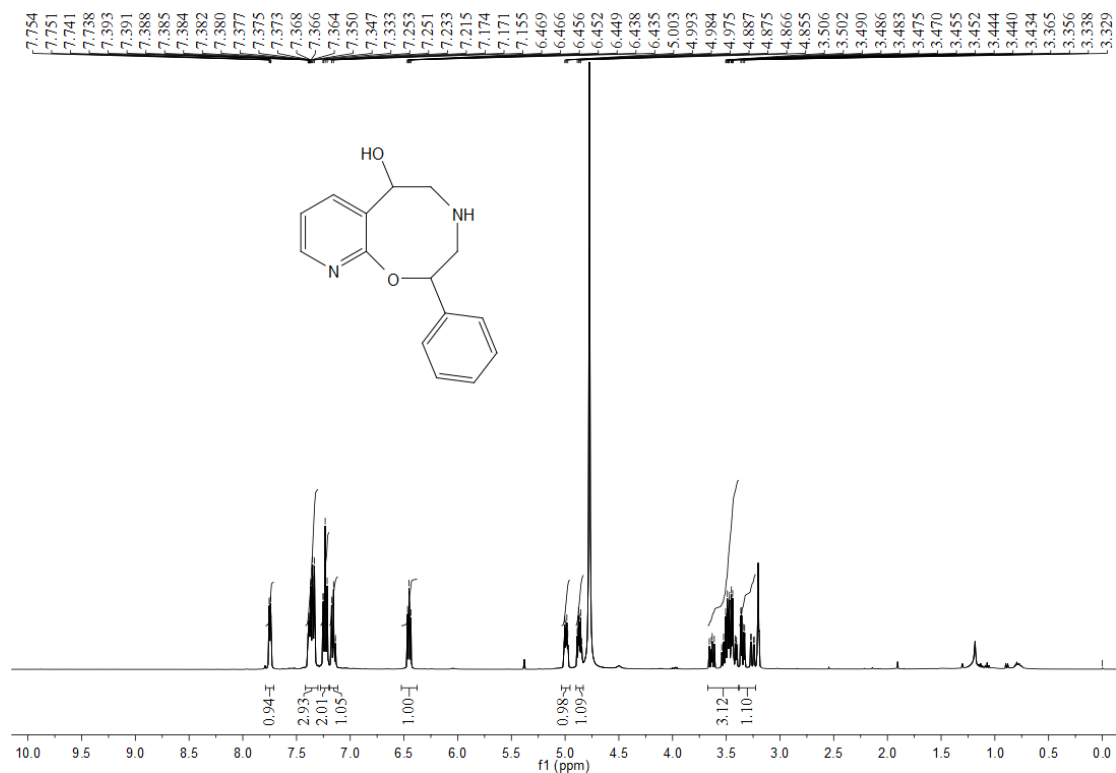

<sup>1</sup>H NMR (400 MHz, CD<sub>3</sub>OD) of **3eu**

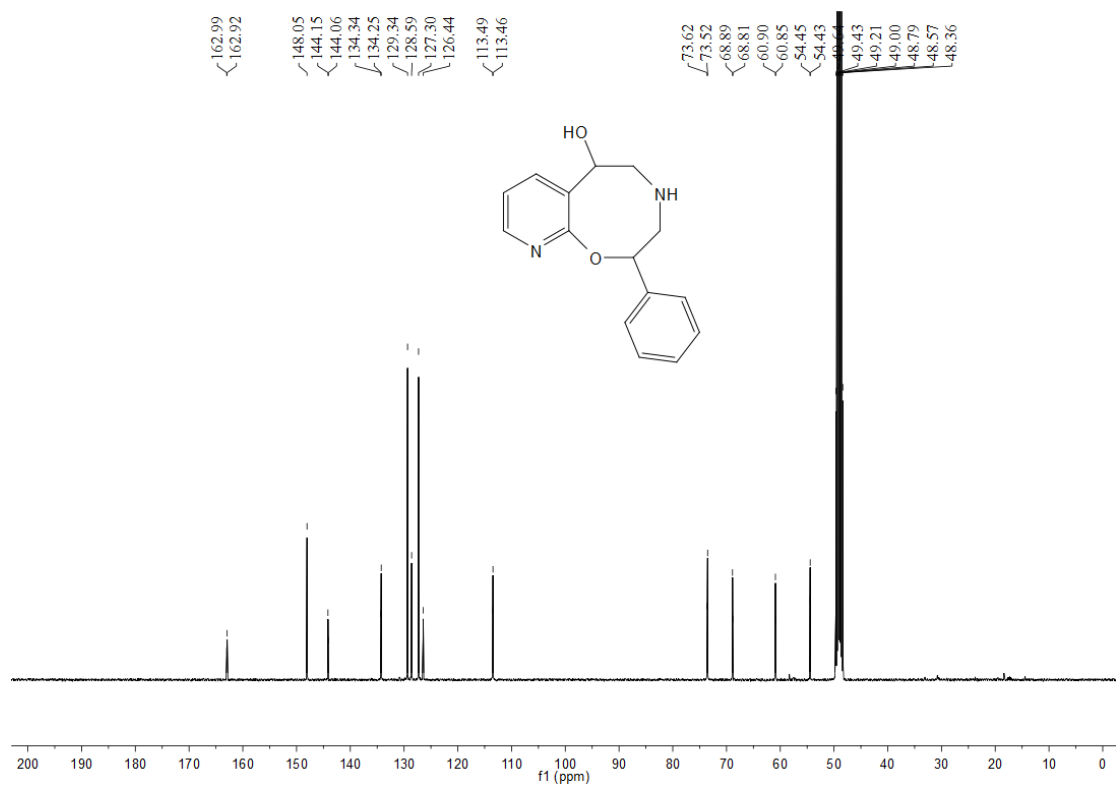

<sup>13</sup>C NMR (100 MHz, CD<sub>3</sub>OD) of **3eu**

***tert*-butyl (*Z*)-9-chloro-3-methyl-2,3-dihydro-4*H*-pyrido[3,4-*g*][1,4]oxazocine-4-carboxylate (**4**)**

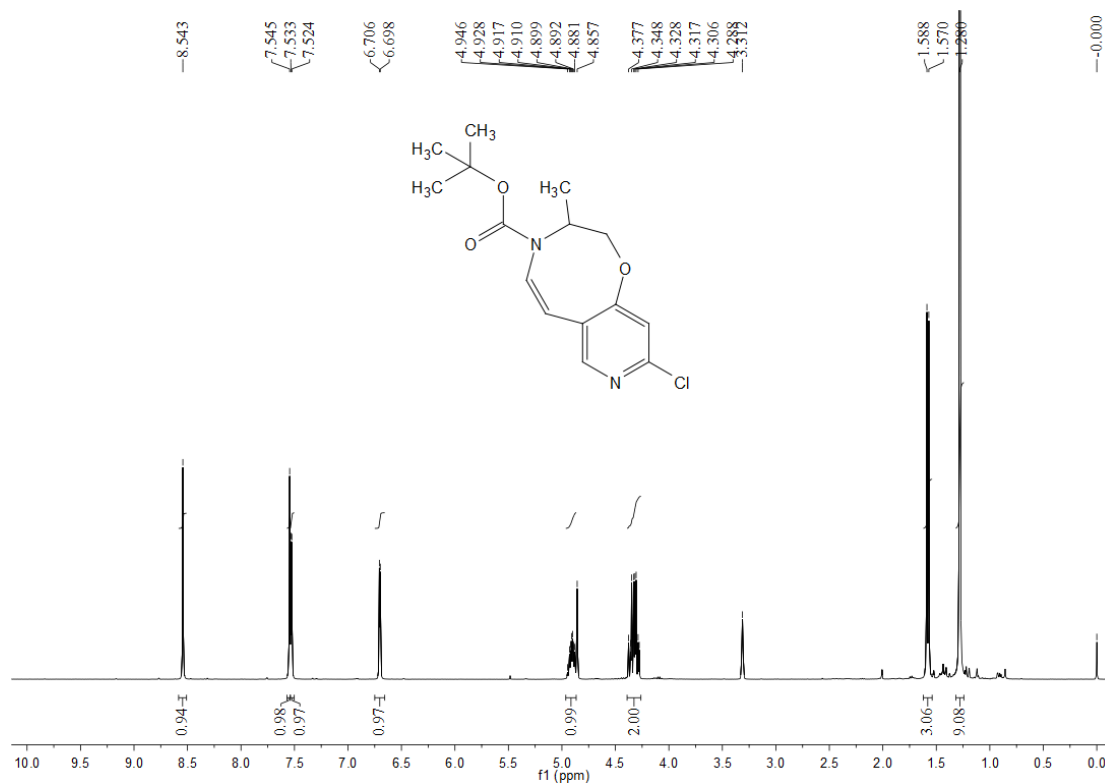

<sup>1</sup>H NMR (400 MHz, CD<sub>3</sub>OD) of **4**

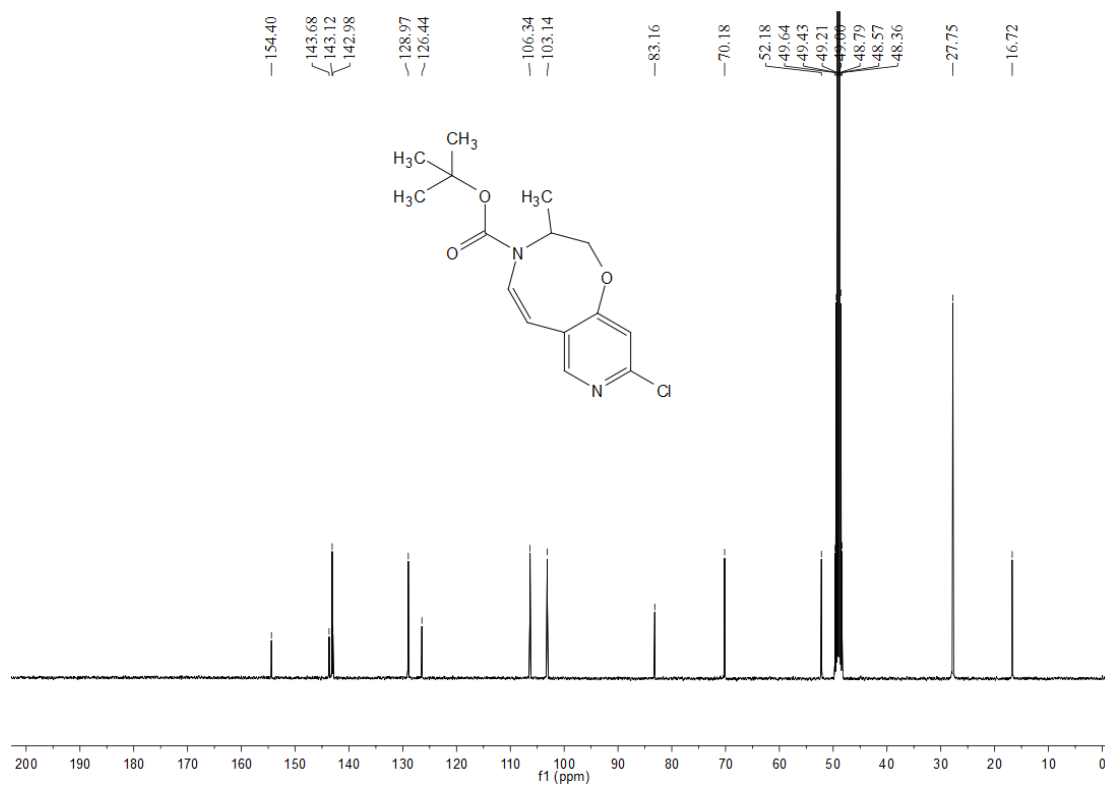

<sup>13</sup>C NMR (100 MHz, CD<sub>3</sub>OD) of **4**

**6-acetoxy-4-benzyl-3,4,5,6-tetrahydro-2H-pyrido[3,2-g][1,4]oxazocin-4-ium  
acetate (5)**

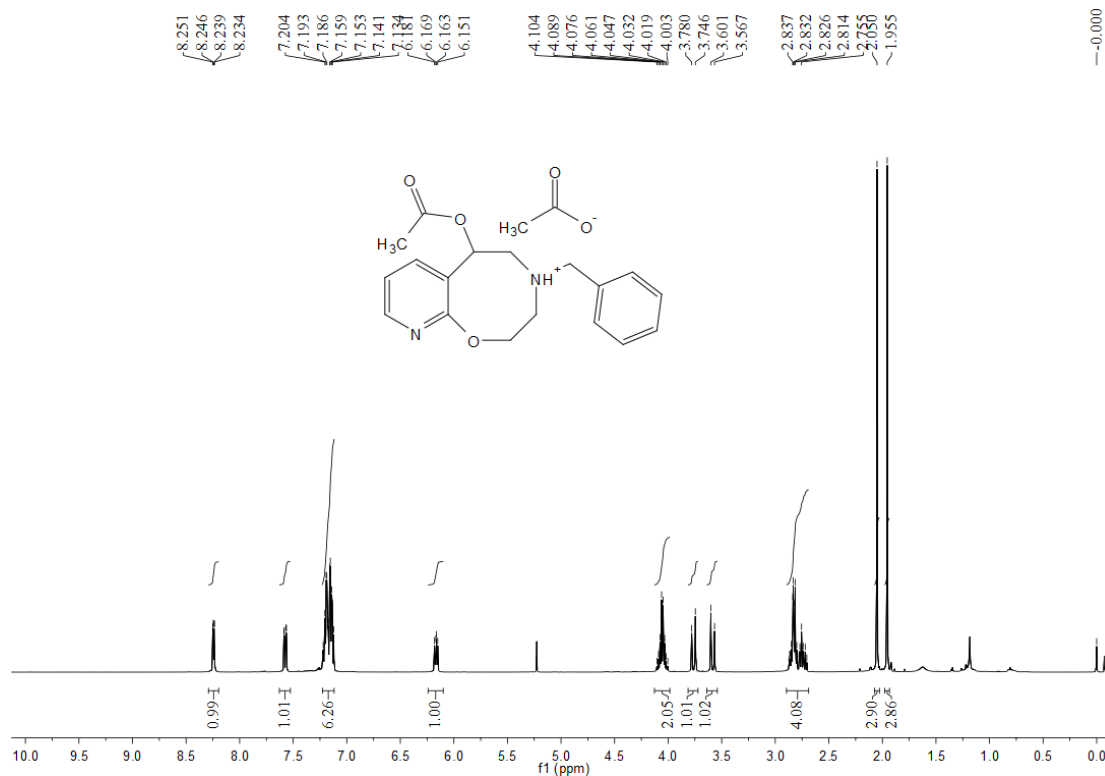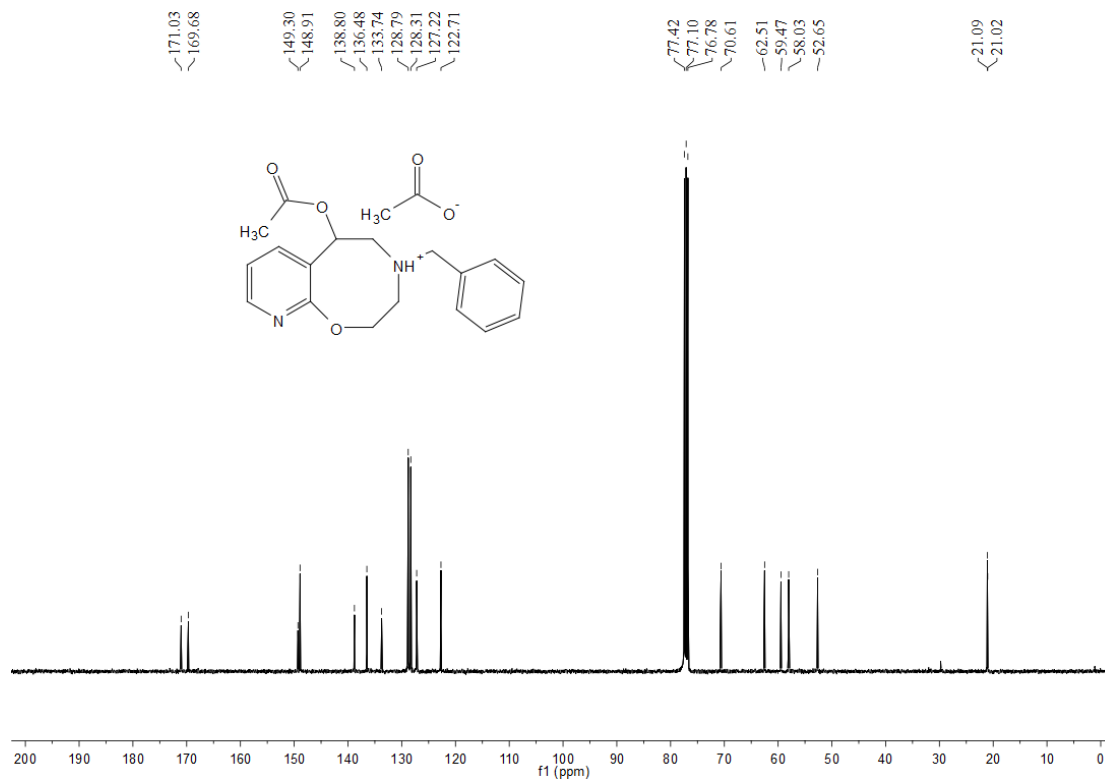

**6-acetoxy-4-benzyl-3,4,5,6-tetrahydro-2H-pyrido[3,2-g][1,4]oxazocin-4-ium  
acetate (5)**

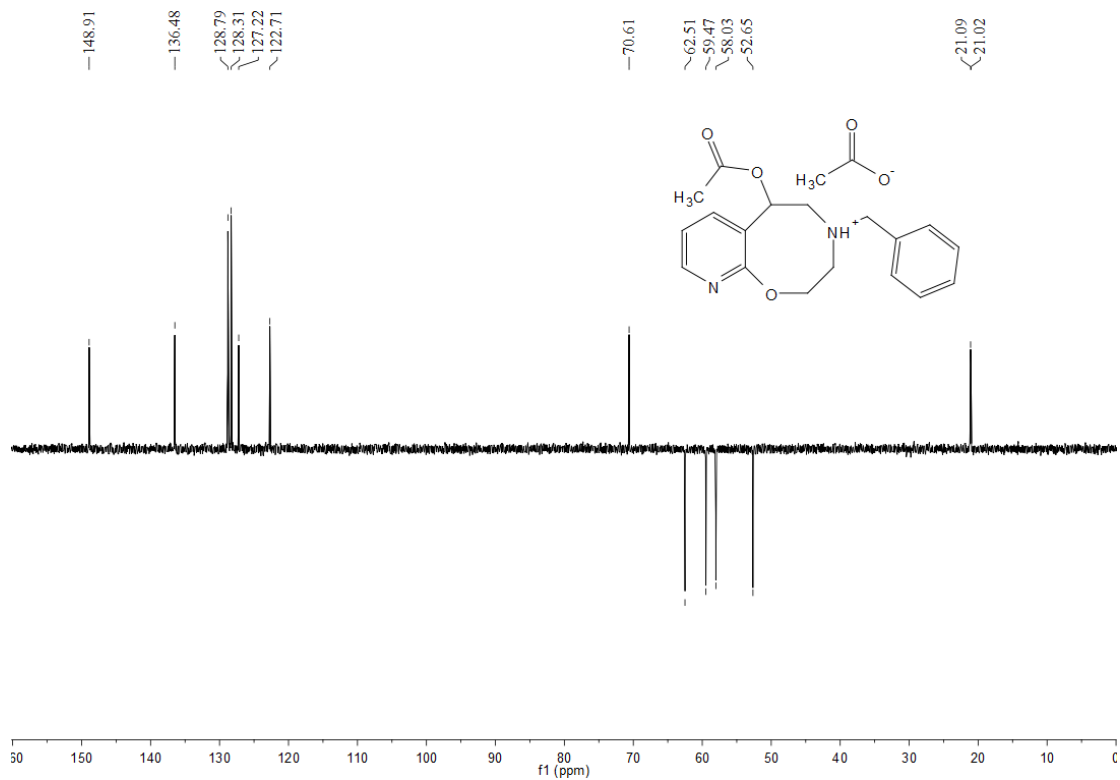

DEPT135 of 5

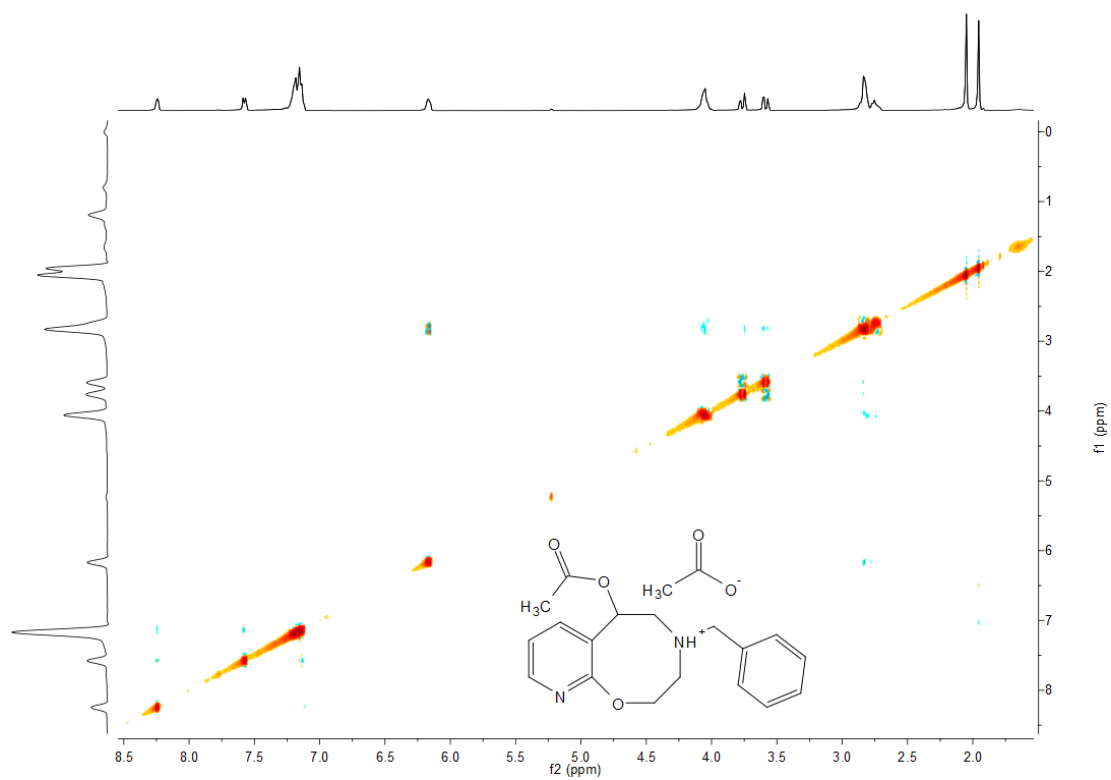

NOESY of 5

**4-benzyl-6-methoxy-3,4,5,6-tetrahydro-2H-pyrido[3,2-g][1,4]oxazocine (6)**

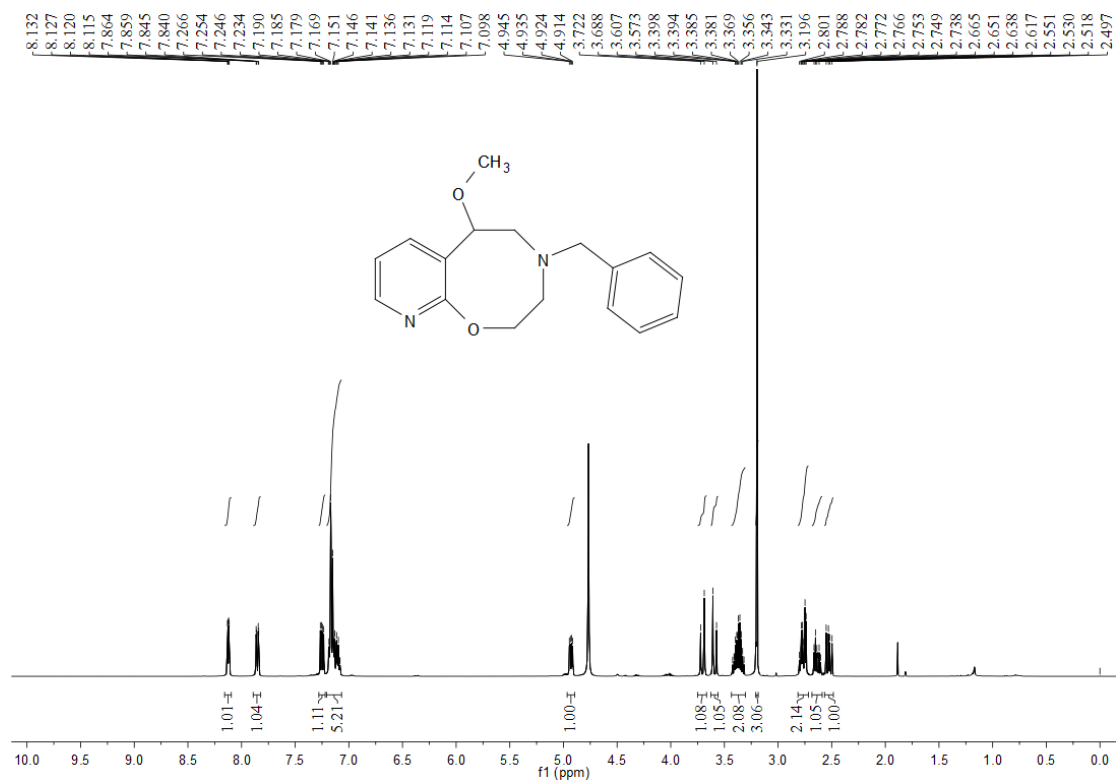

<sup>1</sup>H NMR (400 MHz, CD<sub>3</sub>OD) of **6**

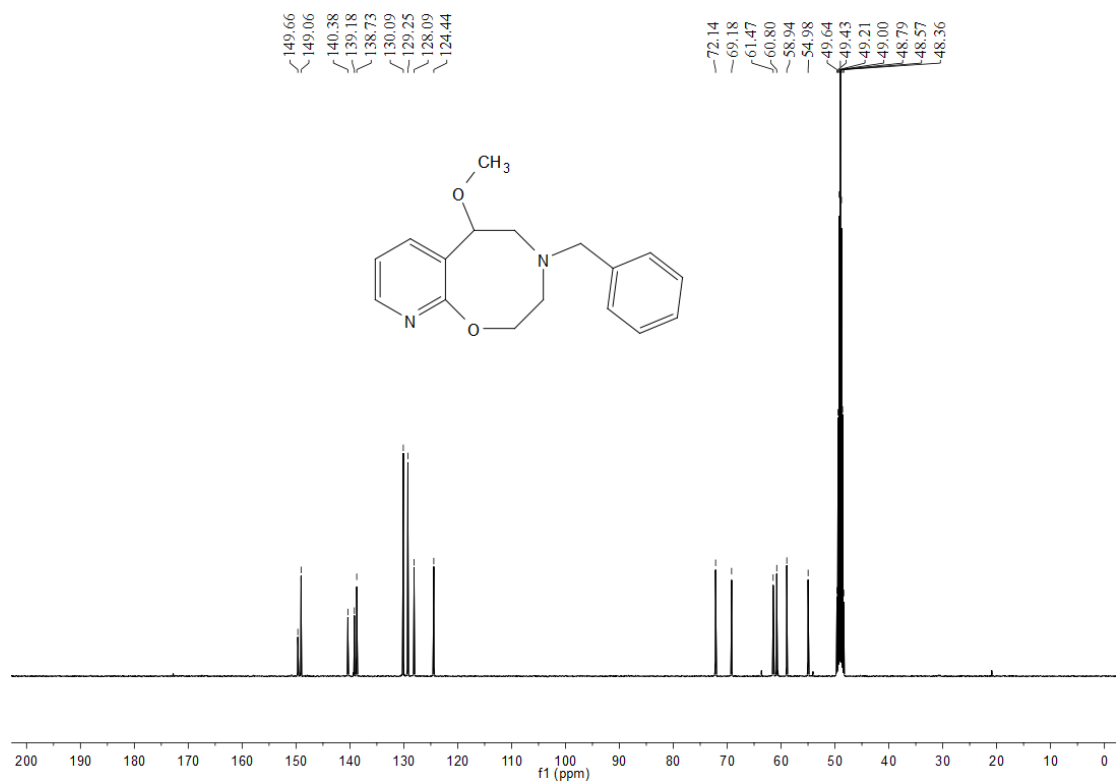

<sup>13</sup>C NMR (100 MHz, CD<sub>3</sub>OD) of **6**

### 3-(4-benzylmorpholin-2-yl)pyridin-2-ol (7)

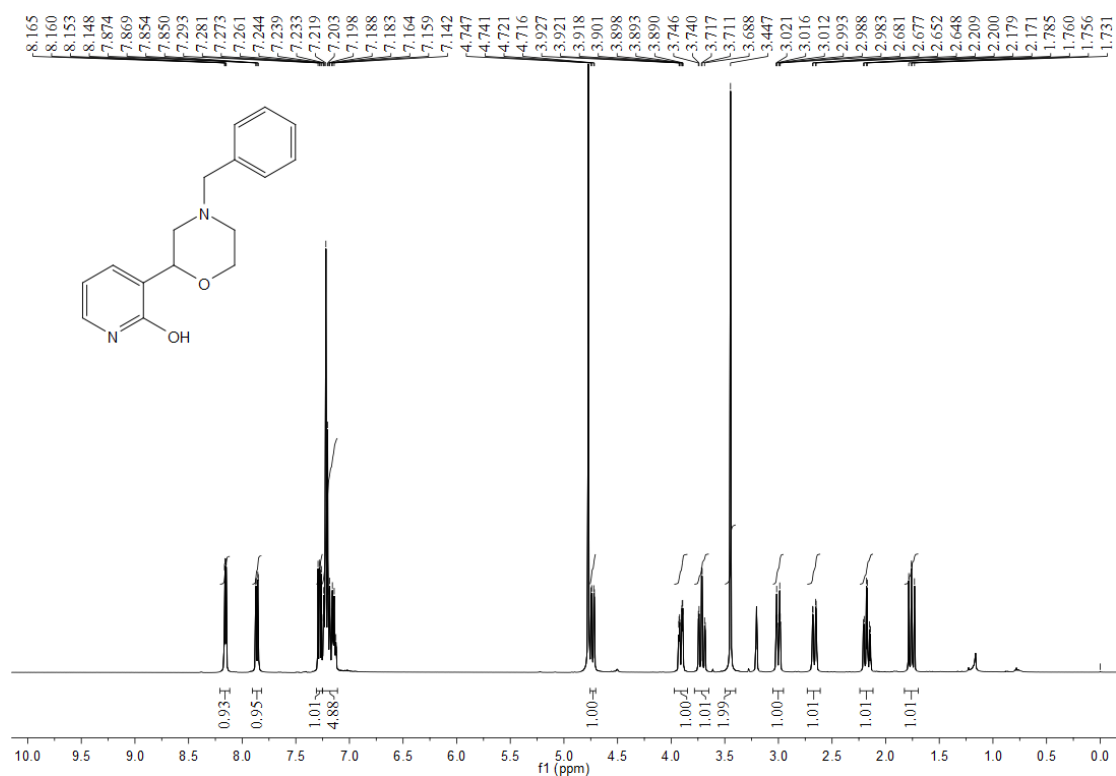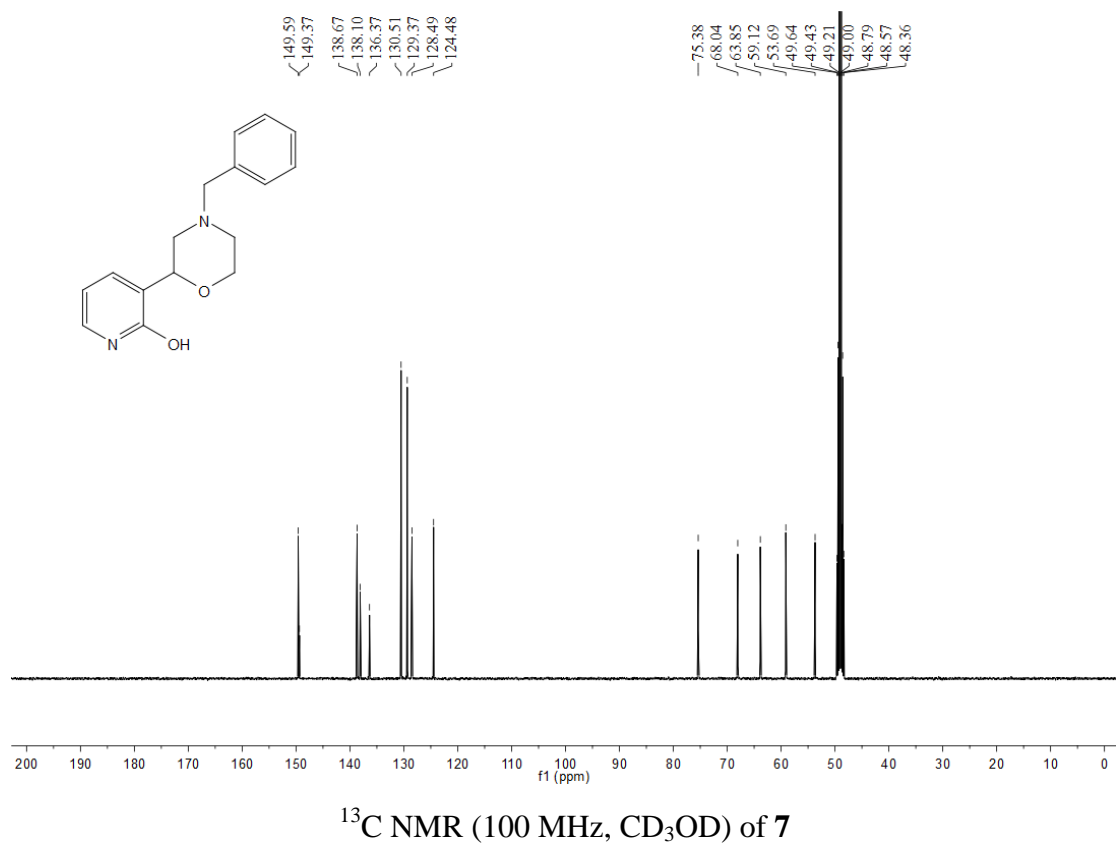



### 3-(4-benzylmorpholin-2-yl)pyridin-2-ol (7)

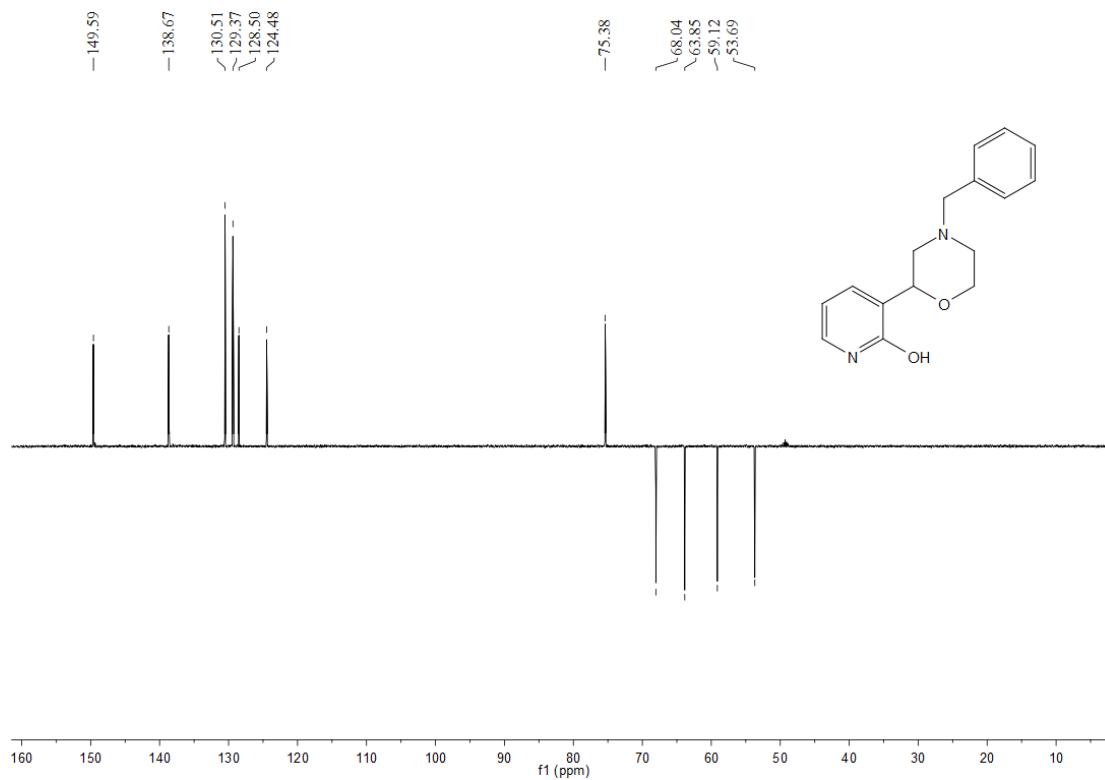

DEPT135 of 7

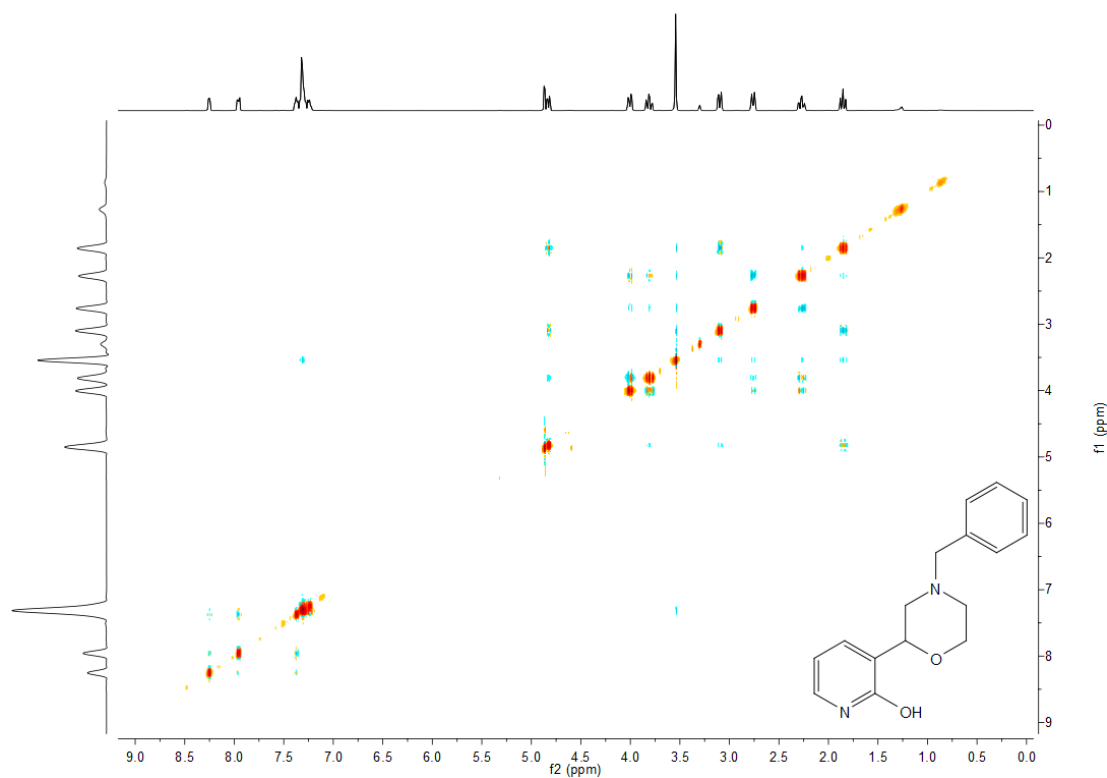

NOESY of 7

### 3-(4-benzylmorpholin-2-yl)pyridin-2-ol (7)

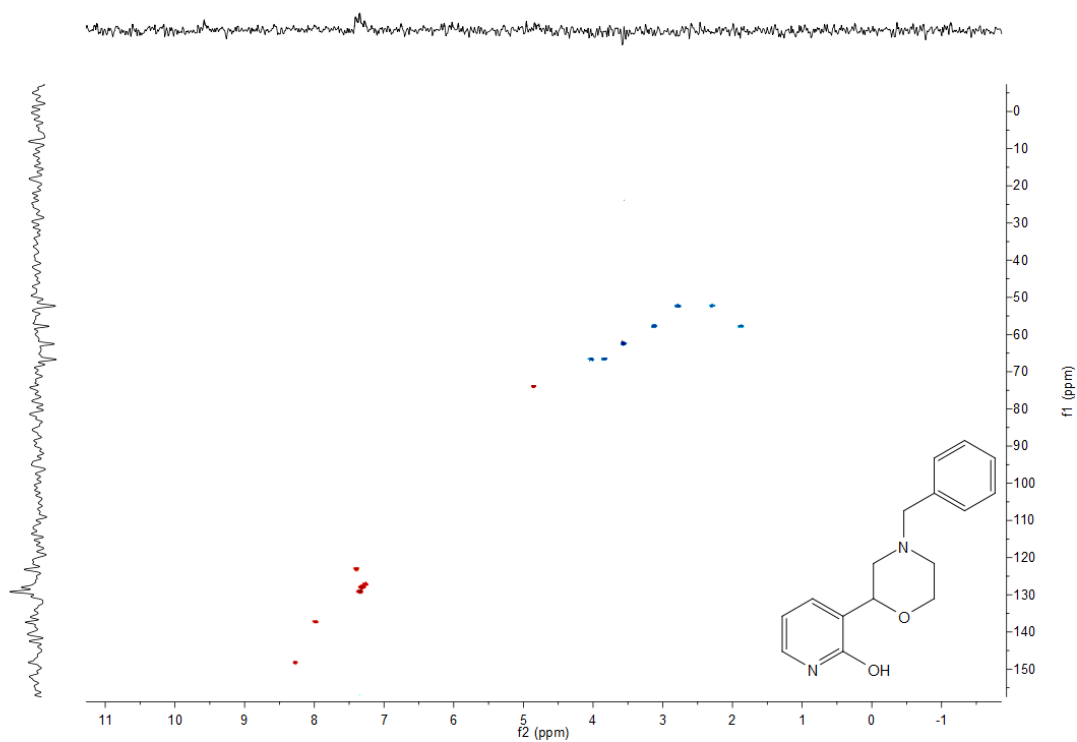

HSQC of 7

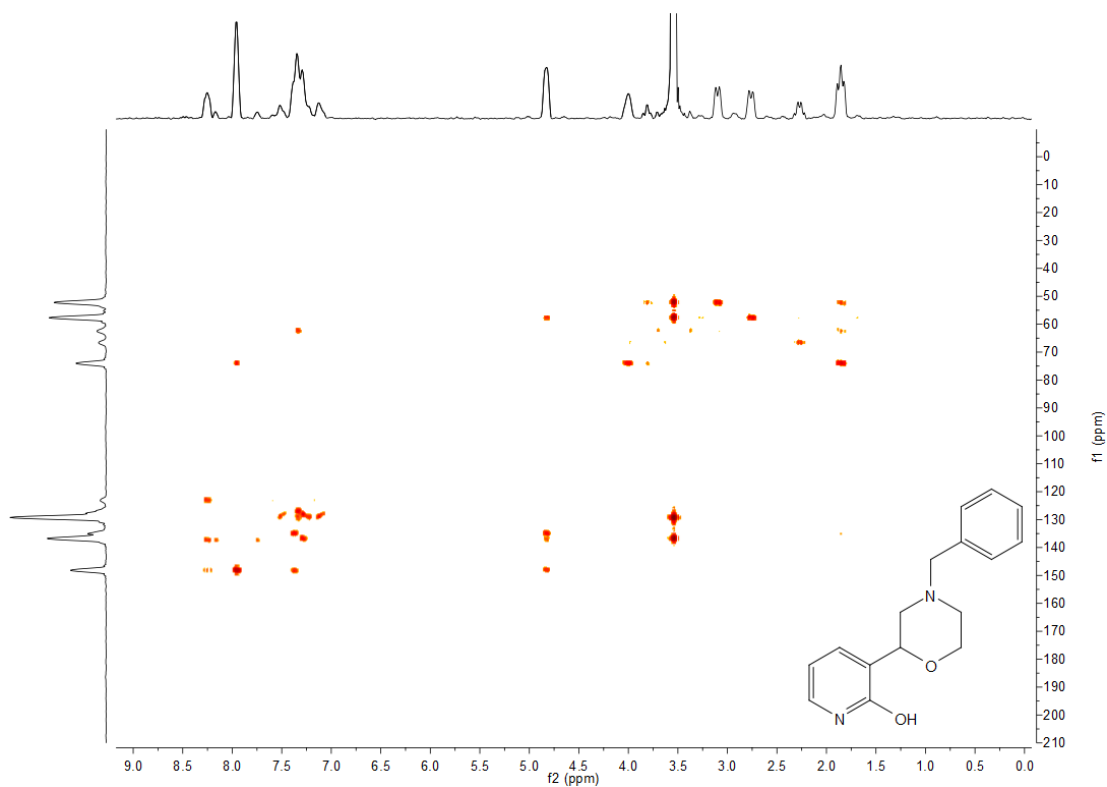

HMBC of 7

**4-methyl-9-(piperidin-1-yl)-3,4,5,6-tetrahydro-2H-pyrido[3,4-g][1,4]oxazocin-6-ol (8)**

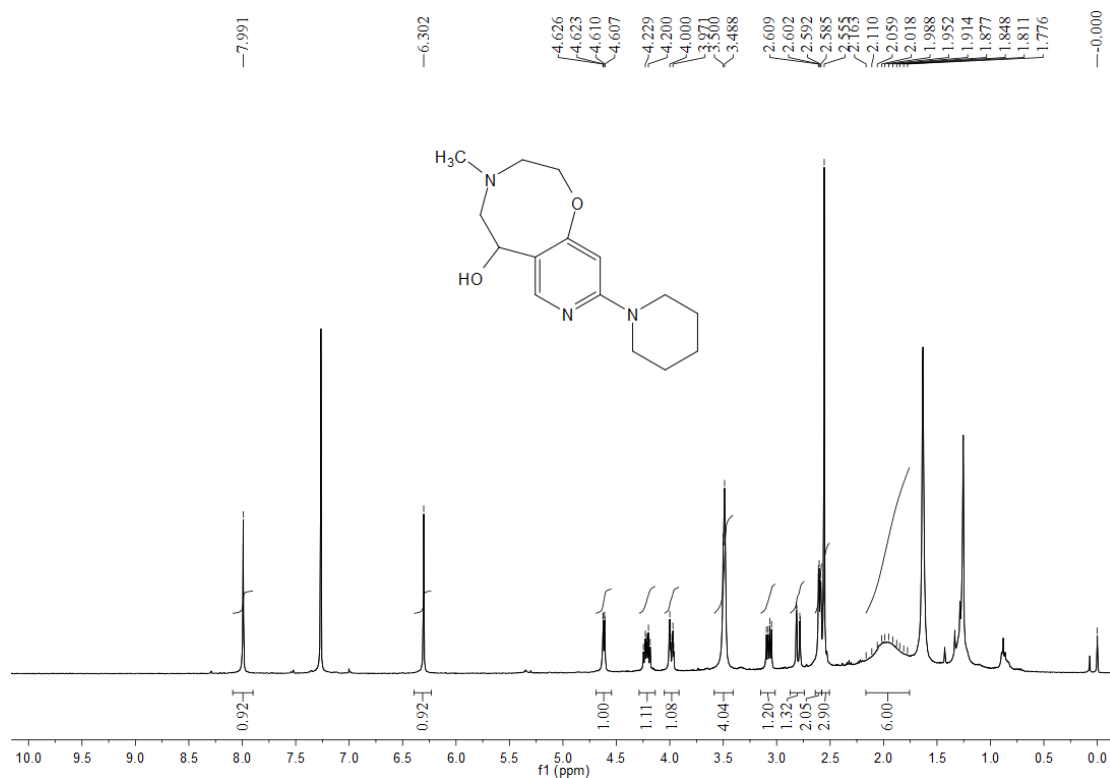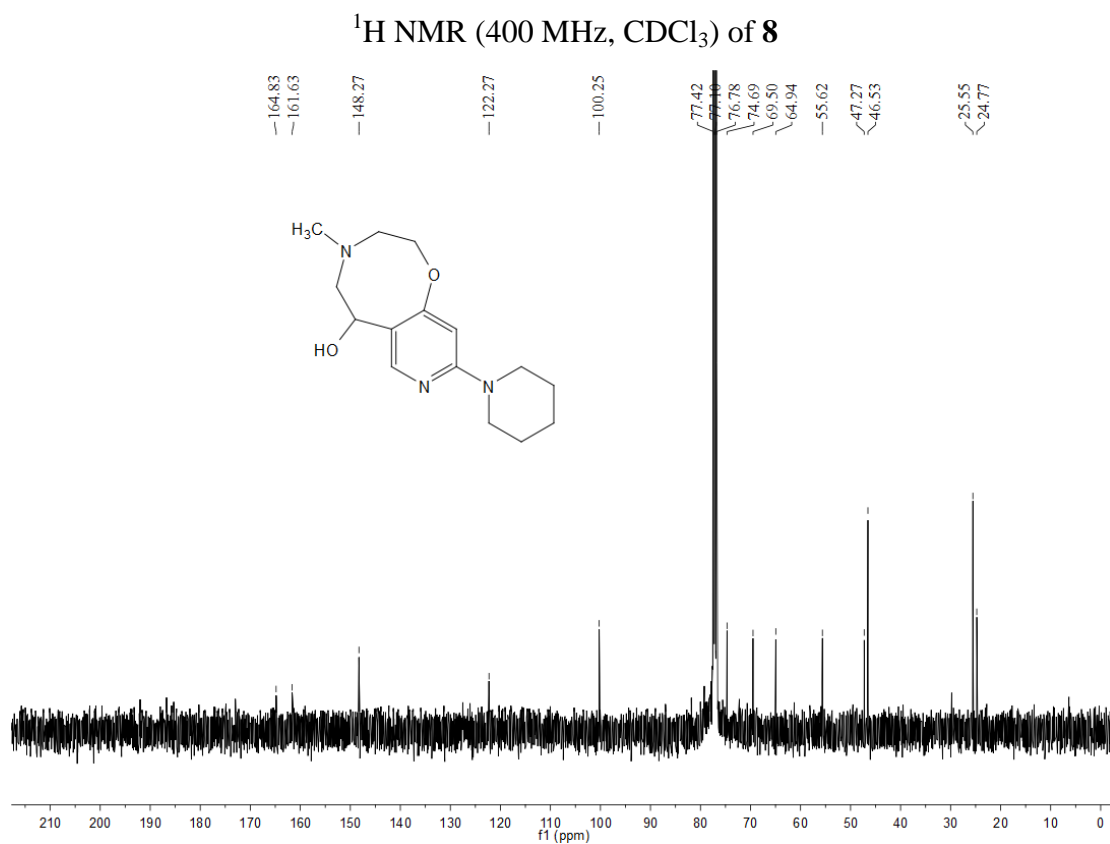

Supplement: d3nj03776b1.pdf [file d3nj03776b1.pdf]
